# Supplementary material for: The ancestral activation promiscuity of ADP-glucose pyrophosphorylases from oxygenic photosynthetic organisms
Source: PubMed Central journal article supplement (PMC3585822; doi:10.1186/1471-2148-13-51), 2013-02-21
Supplement: 1471-2148-13-51-S1.pdf [file 1471-2148-13-51-S1.pdf]

Figure S1

|    | 10        | 20      | 30  | 40      | 50       | 60    | 70          | 80        | 90        | 100       |           |           |        |       |        |        |           |           |
|----|-----------|---------|-----|---------|----------|-------|-------------|-----------|-----------|-----------|-----------|-----------|--------|-------|--------|--------|-----------|-----------|
| 1  | ...       | ...     | ... | ...     | ...      | ...   | ...         | ...       | ...       | ...       |           |           |        |       |        |        |           |           |
| 2  | ...       | ...     | ... | ...     | ...      | ...   | ...         | ...       | ...       | ...       |           |           |        |       |        |        |           |           |
| 3  | ...       | ...     | ... | ...     | ...      | ...   | ...         | ...       | ...       | ...       |           |           |        |       |        |        |           |           |
| 4  | ...       | ...     | ... | ...     | ...      | ...   | ...         | ...       | ...       | ...       |           |           |        |       |        |        |           |           |
| 5  | ...       | ...     | ... | ...     | ...      | ...   | ...         | ...       | ...       | ...       |           |           |        |       |        |        |           |           |
| 6  | ...       | ...     | ... | ...     | ...      | ...   | ...         | ...       | ...       | ...       |           |           |        |       |        |        |           |           |
| 7  | ...       | ...     | ... | ...     | ...      | ...   | ...         | ...       | ...       | ...       |           |           |        |       |        |        |           |           |
| 8  | ...       | ...     | ... | ...     | ...      | ...   | ...         | ...       | ...       | ...       |           |           |        |       |        |        |           |           |
| 9  | ...       | ...     | ... | ...     | ...      | ...   | ...         | ...       | ...       | ...       |           |           |        |       |        |        |           |           |
| 10 | ...       | ...     | ... | ...     | ...      | ...   | ...         | ...       | ...       | ...       |           |           |        |       |        |        |           |           |
| 11 | ...       | ...     | ... | ...     | ...      | ...   | ...         | ...       | ...       | ...       |           |           |        |       |        |        |           |           |
| 12 | ...       | ...     | ... | ...     | ...      | ...   | ...         | ...       | ...       | ...       |           |           |        |       |        |        |           |           |
| 13 | ...       | ...     | ... | ...     | ...      | ...   | ...         | ...       | ...       | ...       |           |           |        |       |        |        |           |           |
| 14 | ...       | ...     | ... | ...     | ...      | ...   | ...         | ...       | ...       | ...       |           |           |        |       |        |        |           |           |
| 15 | ...       | ...     | ... | ...     | ...      | ...   | ...         | ...       | ...       | ...       |           |           |        |       |        |        |           |           |
| 16 | ...       | ...     | ... | ...     | ...      | ...   | ...         | ...       | ...       | ...       |           |           |        |       |        |        |           |           |
| 17 | ...       | ...     | ... | ...     | ...      | ...   | ...         | ...       | ...       | ...       |           |           |        |       |        |        |           |           |
| 18 | ...       | ...     | ... | ...     | ...      | ...   | ...         | ...       | ...       | ...       |           |           |        |       |        |        |           |           |
| 19 | ...       | ...     | ... | ...     | ...      | ...   | ...         | ...       | ...       | ...       |           |           |        |       |        |        |           |           |
| 20 | ...       | ...     | ... | ...     | ...      | ...   | ...         | ...       | ...       | ...       |           |           |        |       |        |        |           |           |
| 21 | ...       | ...     | ... | ...     | ...      | ...   | ...         | ...       | ...       | ...       |           |           |        |       |        |        |           |           |
| 22 | ...       | ...     | ... | ...     | ...      | ...   | ...         | ...       | ...       | ...       |           |           |        |       |        |        |           |           |
| 23 | ...       | ...     | ... | ...     | ...      | ...   | ...         | ...       | ...       | ...       |           |           |        |       |        |        |           |           |
| 24 | ...       | ...     | ... | ...     | ...      | ...   | ...         | ...       | ...       | ...       |           |           |        |       |        |        |           |           |
| 25 | ...       | ...     | ... | ...     | ...      | ...   | ...         | ...       | ...       | ...       |           |           |        |       |        |        |           |           |
| 26 | ...       | ...     | ... | ...     | ...      | ...   | ...         | ...       | ...       | ...       |           |           |        |       |        |        |           |           |
| 27 | NFS--E--L | AFFLE-- | WSG | TRLYLLR | KKRAKPA  | VPIG  | ANYRL--     | NDI       | PVSNCLN-- | SNV--     | SKIYVLT-- | QFNS--    | ASLNR  | HL    | SLRA-- | YASN   | MGGYKNE   |           |
| 28 | SRS--V--L | GIILG-- | SGA | GTRLYPL | TKKRAKPA | VP    | FGANYRL--   | IDI       | PVSNCLN-- | SNI--     | SKIYVLT-- | QFNS--    | ASLNR  | HL    | SLRA-- | YASN   | MGGYKNE   |           |
| 29 | SKS--V--L | GIILG-- | GGG | TRLYPL  | TKKRAKPA | VP    | LGANYRL--   | IDI       | PVSNCLN-- | SNV--     | SKIYVLT-- | QFNS--    | ASLNR  | HL    | SLRA-- | YASN   | MGGYKNE   |           |
| 30 | SRS--V--L | GIILG-- | GGG | TRLYPL  | TKKRAKPA | VP    | LGANYRL--   | IDI       | PVSNCLN-- | SNI--     | SKIYVLT-- | QFNS--    | ASLNR  | HL    | SLRA-- | YASN   | MGGYKNE   |           |
| 31 | SRS--V--L | GIILG-- | GGG | TRLYPL  | TKKRAKPA | VP    | LGANYRL--   | IDI       | PVSNCLN-- | SNI--     | SKIYVLT-- | QFNS--    | ASLNR  | HL    | SLRA-- | YASN   | MGGYKNE   |           |
| 32 | STS--V--L | GIILG-- | GGG | TRLYPL  | TKKRAKPA | VP    | LGANYRL--   | IDI       | PVSNCLN-- | SNV--     | SKIYVLT-- | QFNS--    | ASLNR  | HL    | SLRA-- | YGNN   | IAGYKNE   |           |
| 33 | HDS--V--L | GIILG-- | GGG | TRLYPL  | TKKRAKPA | VP    | LGANYRL--   | IDI       | PVSNCLN-- | SNI--     | SKIYVLT-- | QFNS--    | ASLNR  | HL    | SLRA-- | YGSNI  | GGYKNE    |           |
| 34 | STS--V--L | GIILG-- | GGG | TRLYPL  | TKKRAKPA | VP    | LGANYRL--   | IDI       | PVSNCLN-- | SNI--     | SKIYVLT-- | QFNS--    | ASLNR  | HL    | SLRA-- | YGSNI  | GGYKNE    |           |
| 35 | HDS--V--L | GIILG-- | GGG | TRLYPL  | TKKRAKPA | VP    | LGANYRL--   | IDI       | PVSNCLN-- | SNI--     | SKIYVLT-- | QFNS--    | ASLNR  | HL    | SLRA-- | YGSNI  | GGYKNE    |           |
| 36 | STS--V--L | GIILG-- | GGG | TRLYPL  | TKKRAKPA | VP    | LGANYRL--   | IDI       | PVSNCLN-- | SNI--     | SKIYVLT-- | QFNS--    | ASLNR  | HL    | SLRA-- | YGNN   | IAGYKND   |           |
| 37 | DES--V--L | GIILG-- | GGG | TRLYPL  | TKKRAKPA | VP    | LGANYRL--   | IDI       | PVSNCLN-- | SNI--     | SKIYVLT-- | QFNS--    | ASLNR  | HL    | SLRA-- | YGNNI  | GGYKNE    |           |
| 38 | STS--V--L | GIILG-- | GGG | TRLYPL  | TKKRAKPA | VP    | LGANYRL--   | IDI       | PVSNCLN-- | SNV--     | SKIYVLT-- | QFNS--    | ASLNR  | HL    | SLRA-- | YGNN   | IAGYKNE   |           |
| 39 | STS--V--L | GIILG-- | GGG | TRLYPL  | TKKRAKPA | VP    | LGANYRL--   | IDI       | PVSNCLN-- | SNI--     | SKIYVLT-- | QFNS--    | ASLNR  | HL    | SLRA-- | YGNNI  | GGYKNE    |           |
| 40 | NDS--V--L | GIILG-- | GGG | TRLYPL  | TKKRAKPA | VP    | LGANYRL--   | IDI       | PVSNCLN-- | SNI--     | SKIYVLT-- | QFNS--    | ASLNR  | HL    | SLRA-- | YGSNI  | GGYKNE    |           |
| 41 | STS--V--L | GIILG-- | GGG | TRLYPL  | TKKRAKPA | VP    | LGANYRL--   | IDI       | PVSNCLN-- | SNI--     | SKIYVLT-- | QFNS--    | ASLNR  | HL    | SLRA-- | YGSNI  | GGYKNE    |           |
| 42 | STS--V--L | GIILG-- | GGG | TRLYPL  | TKKRAKPA | VP    | LGANYRL--   | IDI       | PVSNCLN-- | SNI--     | SKIYVLT-- | QFNS--    | ASLNR  | HL    | SLRA-- | YGSNI  | GGYKNE    |           |
| 43 | STS--V--L | GIILG-- | GGG | TRLYPL  | TKKRAKPA | VP    | LRANYRL--   | IDI       | PVSNCLN-- | SNV--     | SKIYVLT-- | QFNS--    | ASLNR  | HL    | SLRA-- | YGNN   | IAGYKNE   |           |
| 44 | STS--V--L | GIILG-- | GGG | TRLYPL  | TKKRAKPA | VP    | LGANYRL--   | IDI       | PVSNCLN-- | SNV--     | SKIYVLT-- | QFNS--    | ASLNR  | HL    | SLRA-- | YGNNI  | GGYKND    |           |
| 45 | IDS--V--L | GIILG-- | GGG | TRLYPL  | TKKRAKPA | VP    | LGANYRL--   | IDI       | PVSNCLN-- | SNI--     | SKIYVLT-- | QFNS--    | ASLNR  | HL    | SLRA-- | YGSNI  | GGYKNE    |           |
| 46 | STS--V--L | GIILG-- | GGG | TRLYPL  | TKKRAKPA | VP    | LGANYRL--   | IDI       | PVSNCLN-- | SNI--     | SKIYVLT-- | QFNS--    | ASLNR  | HL    | SLRA-- | YGSNI  | GGYKNE    |           |
| 47 | STS--V--L | GIILG-- | GGG | TRLYPL  | TKKRAKPA | VP    | LGANYRL--   | IDI       | PVSNCLN-- | SNV--     | SKIYVLT-- | QFNS--    | ASLNR  | HL    | SLRA-- | YGNN   | IAGYKND   |           |
| 48 | DDS--V--L | GIILG-- | GGG | TRLYPL  | TKKRAKPA | VP    | LGANYRL--   | IDI       | PVSNCLN-- | SNI--     | SKIYVLT-- | QFNS--    | ASLNR  | HL    | SLRA-- | YGSNI  | GGYKNE    |           |
| 49 | PKD--V--A | AVILG-- | GGG | EKTLF   | PLTSRT   | TATPA | VPVGGCYRL-- | IDI       | PMSNCIN-- | SAI--     | NKIFVLT-- | QYNS--    | ASLNR  | HL    | SLRA-- | Y-FG   | NGVSVFGD  |           |
| 50 | PKA--V--A | SVILG-- | GGV | GTRLF   | PLTSRR   | AKPA  | VPIGGCYRL-- | IDV       | PMSNCIN-- | SGI--     | RKIFILT-- | QFNS--    | ASLNR  | HL    | SLRA-- | Y-FG   | NGVSVFGD  |           |
| 51 | ART--V--V | AIILG-- | GGG | TRLF    | PLTKRRA  | KPA   | VP          | MGGAYRL-- | IDV       | PMSNCIN-- | SGI--     | NKVYILT-- | QFNS-- | ASLNR | HL     | SLRA-- | Y-FG      | NGVSVTFES |
| 52 | PRT--V--A | SIILG-- | GGG | TRLF    | PLTKRRA  | KPA   | VPIGGAYRL-- | IDV       | PMSNCIN-- | SGI--     | NKVYILT-- | QYNS--    | ASLNR  | HL    | SLRA-- | YNS--  | NGLG      | FGD       |
| 53 | PKN--V--A | SIILG-- | GGG | TRLF    | PLTSKRA  | KPA   | VPIGGCYRL-- | IDI       | PMSNCIN-- | SGI--     | RKIFILT-- | QFNS--    | FSLNR  | HL    | SLRT-- | Y-FG   | NGVSVNFGD |           |
| 54 | PKN--V--A | AIILG-- | GGG | AKLFL   | PLTKRA   | ATPA  | VPVGGCYRM-- | IDI       | PMSNCIN-- | SCI--     | NKIFVLT-- | QFNS--    | ASLNR  | HL    | SLRT-- | Y-FG   | NGVSVNFGD |           |
| 55 | PQN--V--A | AIILG-- | GGG | AKLFL   | PLTKRA   | ATPA  | VPVGGCYRL-- | IDI       | PMSNCIN-- | SCI--     | NKIFVLT-- | QFNS--    | ASLNR  | HL    | SLRT-- | Y-FG   | NGVSVNFGG |           |
| 56 | PKD--V--A | AVILG-- | GGG | EKTLF   | PLTSRT   | TATPA | VPVGGCYRL-- | IDI       | PMSNCIN-- | SAI--     | NKIFVLT-- | QYNS--    | ASLNR  | HL    | SLRT-- | Y-FG   | NGVSVFGD  |           |
| 57 | PKA--V--A | SVILG-- | GGV | GTRLF   | PLTSRR   | AKPA  | VPIGGCYRL-- | IDV       | PMSNCIN-- | SGI--     | RKIFILT-- | QFNS--    | FSLNR  | HL    | SLRT-- | Y-FG   | NGVSVFGD  |           |
| 58 | ART--V--V | AIILG-- | GGG | TRLF    | PLTKRRA  | KPA   | VPIGGAYRL-- | IDV       | PMSNCIN-- | SGI--     | NKVYILT-- | QFNS--    | ASLNR  | HL    | SLRA-- | Y-FG   | NGVSVTFGD |           |
| 59 | PKD--V--A | AVILG-- | GGG | EKTLF   | PLTSRT   | TATPA | VPVGGCYRL-- | IDI       | PMSNCIN-- | SAI--     | NKIFVLT-- | QYNS--    | ASLNR  | HL    | SLRT-- | Y-FG   | NGVSVFGD  |           |
| 60 | PKA--V--A | SVILG-- | GGV | GTRLF   | PLTSRR   | AKPA  | VPIGGCYRV-- | IDV       | PMSNCIN-- | SGI--     | RKIFILT-- | QFNS--    | FSLNR  | HL    | SLRT-- | Y-FG   | NGVSVFGD  |           |
| 61 | SRT--V--A | SIILG-- | GGG | TRLF    | PLTKRRA  | KPA   | VPIGGAYRL-- | IDV       | PMSNCIN-- | SGI--     | NKVYILT-- | QYNS--    | ASLNR  | HL    | SLRA-- | YNS--  | NGV       | FGD       |
| 62 | PKN--V--A | SIILG-- | GGG | TRLF    | PLTSKRA  | KPA   | VPIGGCYRL-- | IDV       | PMSNCIN-- | SGI--     | RKIFILT-- | QFNS--    | FSLNR  | HL    | SLCT-- | Y-FG   | NGVSVNFGD |           |
| 63 | PKN--V--A | AIILG-- | GGG | AKLFL   | PLTKRA   | ATPA  | VPVGGCYRM-- | IDI       | PMSNCIN-- | SGI--     | NKIFVLT-- | QFNS--    | ASLNR  | HL    | SLRT-- | Y-FG   | NGVSVNFGD |           |
| 64 | PQN--V--A | AIILG-- | GGG | AKLFL   | PLTKRA   | ATPA  | VPVGGCYRL-- | IDI       | PMSNCIN-- | SCI--     | NKIFVLT-- | QFNS--    | ASLNR  | HL    | SLRT-- | Y-FG   | NGVSVNFGG |           |
| 65 | PKT--V--A | SIILG-- | GGG | TRLF    | PLTKRRA  | KPA   | VPIGGCYRL-- | VDI       | PMSNCIN-- | SGI--     | NKIFVLT-- | QFNS--    | QSLNR  | HL    | SLRT-- | Y-NW   | GGCINFGG  |           |
| 66 | PRT--V--L | AVILG-- | GGG | TRLF    | PLTKRRA  | KPA   | VPIGGAYRL-- | IDV       | PMSNCIN-- | SGI--     | NKVYILT-- | QFNS--    | ASLNR  | HL    | SLRA-- | YNS    | NGV       | TFGD      |
| 67 | PEN--V--A | AIILG-- | GGG | TRLF    | PLTSR    | AKQAV | PIGGCYRL--  | IDI       | PMSNCIN-- | SGI--     | RKIFILT-- | QFNS--    | ASLNR  | HL    | SLRT-- | Y-FG   | NGVSVNFGG |           |
| 68 | PEN--V--V | AIILG-- | GGG | TRLF    | PLTSR    | AKQAV | PIGGCYRL--  | IDI       | PMSNCIN-- | SGI--     | RKIFILT-- | QFNS--    | FSLNR  | HL    | SLRT-- | Y-FG   | NGVSVNFGG |           |
| 69 | PEN--V--V | AIILG-- | GGG | TRLF    | PLTSR    | AKQAV | PIGGCYRL--  | IDI       | PMSNCIN-- | SGI--     | RKIFILT-- | QFNS--    | FSLNR  | HL    | SLRT-- | Y-FG   | NGVSVNFGG |           |
| 70 | PKN--V--V | SIILG-- | GGG | PIQLF   | PLTKRA   | ATPA  | VPVGGCYRL-- | IDI       | PMSNCIN-- | SGI--     | NKIFVLT-- | QFNS--    | ASLNR  | HL    | SLRT-- | Y-FG   | NGVSVNFGD |           |
| 71 | PKN--V--V | SVILG-- | GGG | PIQLF   | PLTKRA   | ATPA  | VPVGGCYRL-- | IDV       | PMSNCIN-- | SGI--     | NKIFVLT-- | QFNS--    | ASLNR  | HL    | SLRT-- | Y-FG   | NGVSVNFGD |           |
| 72 | PRT--V--V | AVILG-- | GGG | TRLF    | PLTKRRA  | KPA   | VPIGGAYRL-- | IDV       | PMSNCIN-- | SGI--     | NKVYILT-- | QFNS--    | ASLNR  | HL    | SLRA-- | YNS    | NGV       | TFGD      |

73 PKS--V--ASIILG--GGAGTRFLPFLTGRRAKPAVPIGGCYRL--IDIPMSNCIN--SGI--RKIFILT--QFNS--FSLNRHLSRA--YFSGNGMTFGD  
74 PKN--V--VSIILG--GGPGTQLFPLTKRAATPAVPVGGCYRL--IDIPMSNCIN--SGI--NKIFVLT--QFNS--ASLNRHILART--Y-FGNGINFGD  
75 PKS--V--ASIILG--GGAGTRFLPFLTGRRAKPAVPIGGCYRL--IDIPMSNCIN--SGI--RKIFILT--QFNS--FSLNRHLSRA--YFSGNGITFGD  
76 PKN--V--ISIILG--GGPGTQLFPLTKRAATPAVPVGGCYRL--IDIPMSNCIN--SGI--NKIFVLT--QFNS--ASLNRHILART--Y-FGNGINFGD  
77 PKT--V--ASIILG--GGAGTRFLPFLTQRRAKPAVPIGGCYRL--VDIPMSNCIN--SGI--NKIYVLT--QFNS--QSLNRHIAQT--YNLGGCINFGG  
80 PKN--V--ASIVLG--GGPGVQLFPLTKRAATPAVPVGGCYRL--IDIPMSNCIN--SGI--NKIFVLT--QFNS--ASLNRHILART--Y-FGNGINFGD  
81 PKT--V--AAIILG--GGAGTRFLPFLTRRAKPAVPIGGCYRL--IDVPMSNCIN--SGI--NKIYILT--QFNS--QSLNRHILART--YNQNGVDFGD  
82 PKN--V--ASIILG--GGAGTQLFPLTRRAATPAVPLGGCYRL--IDIPMSNCIN--SGI--NKIFVLT--QFNS--TSLNRHILART--Y-FGNGIIFGD  
84 PRT--V--VAVILG--GGAGTRFLPFLTKRRAKPAVPIGGSYRL--IDVPMSNCIN--SGI--NKVYILT--QYNS--ASLNRHLARA--YNLNGVVSFGD  
87 PRT--V--VAIILG--GGAGTRFLPFLTKRRAKPAVPIGGAYRL--IDVPMSNCIN--SGI--NKVYILT--QFNS--ASLNRHLARA--YFNFGVNFSGD  
88 PKT--V--ASIILG--GGAGTRFLPFLTRTRAKPAVPIGGCYRL--IDVPMSNCIN--SGI--NKIYILT--QFNS--QSLNRHILART--YNSGVNFSGD  
89 PKN--V--ASIILG--GGAGTQLFPLTRRAATPAVPVGGCYL--IDIPMSNCIN--SGI--NKIFVLT--QFNS--ASLNRHILART--Y-FGNGINFGD  
90 PKK--V--ASIILG--GGAGTRFLPFLTSKRAKPAVPIGGCYRL--IDIPMSNCIN--SGI--RKIFIMT--QFNS--FSLNRHLART--YFNFGVNFSGD  
91 PSS--V--AAIILG--GGAGTRFLPFLTSRRAKPAVPIGGCYRL--IDVPMSNCIN--SGI--RKIFILT--QFNS--ASLNRHLART--YFNFGVNFSGD  
92 PKT--V--ASIILG--GGAGTRFLPFLTKSRAKPAVPIGGCYRL--IDVPMSNCIN--SGI--NKIYILT--QFNS--QSLNRHILART--YNLGSVNFSGD  
94 PRT--V--VAVILG--GGAGTRFLPFLTKRRAKPAVPIGGSYRL--IDVPMSNCIN--SGI--NKVYILT--QFNS--ASLNRHLARA--YFNHGVNFSGD  
95 PKN--V--ASIILG--GGAGTQLFPLTIRQATPAVPVGGCYRL--IDIPMSNCIN--SNI--NKIFILT--QFNS--ASLNRHILART--Y-FGNGVNFSGD  
96 PGN--V--ASIILG--GGAGTRFLPFLTSKRAKPAVPIGGCYRL--IDIPMSNCIN--SGI--KKIFILT--QFNS--ASLNRHLART--Y-FGNGINFGD  
97 PKN--V--ASIILG--GGAGTQLFPLTRRAATPAVPVGGCYRL--IDIPMSNCIN--SGI--NKIFVLT--QFNS--ASLNRHLART--Y-FGNGINFGD  
98 PSN--V--ASIILG--GGAGTRFLPFLTSRRAKPAVPIGGCYRL--IDIPMSNCIN--SGI--KKIFILT--QFNS--FSLNRHLART--YFNFGVVSFGD  
99 SKT--V--VAVILG--GGAGTRFLPFLTRRAKPAVPIGGAYRL--IDVPMSNCIN--SGI--NKVYILT--QFNS--QSLNRHLSRA--YDFSNGVAIGD  
100 ANR--V--SAIILG--GGTGSQFLPFLSTRATPAVPVGGCYRL--IDIPMSNCFN--SGI--NKIFVMS--QFNS--TSLNRHILART--YLE-GGINFAD  
101 PNE--V--AAVILG--GGTGTQLFPLTSTRATPAVPVGGCYRL--IDIPMSNCFN--SGI--NKIFVMT--QFNS--ASLNRHILART--YLG-GGINFTD  
102 PDT--V--ASIILG--GGAGTRFLPFLTRTRAKPAVPIGGCYRL--IDIPMSNCIN--SKI--NKIYVLT--QFNS--QSLNRHILART--YFNHGVNFSGD  
103 PNE--V--AAVILG--GGTGTQLFPLTSTRATPAVPVGGCYRL--IDIPMSNCFN--SGI--NKIFVMT--QFNS--ASLNRHILART--YLG-GGINFTD  
104 PDT--V--ASIILG--GGAGTRFLPFLTRTRAKPAVPIGGCYRL--IDIPMSNCIN--SKI--NKIYVLT--QFNS--QSLNRHILART--YFNHGVNFSGD  
105 ART--V--VAVILG--GGAGTRFLPFLTKRRAKPAVPIGGAYRL--IDVPMSNCIN--SGI--NKVYVLT--QFNS--ASLNRHLSRA--YFNHGVNFSGD  
106 SKT--V--VAVILG--GGAGTRFLPFLTKRRAKPAVPIGGAYRL--IDVPMSNCIN--SGI--NKVYILT--QFNS--ASLNRHLSRA--YFNHGVNFSGD  
107 PNE--V--AAVILG--GGTGTQLFPLTSTRATPAVPVGGCYRL--IDIPMSNCFN--SGI--NKIFIMT--QFNS--ASLNRHILART--YLG-GGINFTD  
108 PDT--V--ASIILG--GGAGTRFLPFLTRTRAKPAVPIGGCYRL--IDIPMSNCIN--SKI--NKIYVLT--QFNS--ASLNRHILART--YFNHGVNFSGD  
109 ASH--V--SAVILG--GGTGVQLFPLTSTRATPAVPVGGCYRL--IDIPMSNCFN--SGI--NKIFVMT--QFNS--ASLNRHILART--YLG-GGINFTD  
110 PNE--V--AAVILG--GGTGTQLFPLTSTRATPAVPVGGCYRL--IDIPMSNCFN--SGI--NKIFVMT--QFNS--ASLNRHILART--YLG-GGINFTD  
111 ANH--V--SAIILG--GGTGSQFLPFLTSTRATPAVPVGGCYRL--IDIPMSNCFN--SGI--NKIFVMT--QFNS--TSLNRHILART--YLG-GEINFAD  
112 SRT--V--VAVILG--GGAGTRFLPFLTKRRAKPAVPIGGAYRL--IDVPMSNCIN--SGI--NKVYILT--QFNS--QSLNRHLSRA--YDCTNGVAFGD  
113 PNE--V--AAVILG--GGTGTQLFPLTSTRATPAVPVGGCYRL--IDIPMSNCFN--SGI--NKIFVMT--QFNS--ASLNRHILART--YLG-GGINFTD  
114 PRT--V--VAVILG--GGAGTRFLPFLTKRRAKPAVPIGGAYRL--IDVPMSNCIN--SGI--NKVYVLT--QFNS--ASLNRHLFRA--YFNHGVNFSGD  
115 RPS--V--AAVILG--GGTGTQLFPLTSTRATPAVPVGGCYRL--IDIPMSNCFN--SGI--NKIFVMT--QFNS--ASLNRHILART--YLG-GGINFTD  
116 PRT--V--VAVILG--GGAGTRFLPFLTRQRAKPAVPIGGAYRL--IDVPMSNCIN--SGI--NKVYILT--QFNS--ASLNRHLARA--YFNHGVNFSGD  
117 PNE--V--AAVILG--GGTGTQLFPLTSTRATPAVPVGGCYRL--IDIPMSNCFN--SGI--NKIFVMT--QFNS--ASLNRHILART--YLG-GGINFTD  
118 PRT--V--VAVILG--GGAGTRFLPFLTKRRAKPAVPIGGAYRL--IDVPMSNCIN--SGI--NKVYVLT--QFNS--ASLNRHLSRA--YFNHGVNFSGD  
119 PNE--V--AAVILG--GGTGTQLFPLTSTRATPAVPVGGCYRL--IDIPMSNCFN--SGI--NKIFVMT--QFNS--ASLNRHILART--YLG-GGINFTD  
120 PNE--V--AAVILG--GGTGTQLFPLTSTRATPAVPVGGCYRL--IDIPMSNCFN--SGI--NKIFVMT--QFNS--ASLNRHILART--YLG-GGINFTD  
121 MKR--V--LAIILG--GGAGTRFLPFLTKMRAKPAVPLAGKYRL--IDIPISNCIN--SNI--TKMYVLT--QFNS--ASLNRHLSQT--YDLSA--GFGQ  
122 MKQ--V--LAVILG--GGAGTRFLPFLTKMRAKPAVPLAGKYRL--IDIPISNCIN--SEI--LKIYILT--QFNS--ASLNRHILART--YFNFS--GFTD  
123 MKK--V--LAIILG--GGAGTRFLPFLTKMRAKPAVPLAGKYRL--IDIPVSNCFN--SEI--FKIYVLT--QFNS--ASLNRHILART--YFNFT--GFNE  
124 MKK--V--LAIILG--GGAGTRFLPFLTKLRAKPAVPLAGKYRL--IDIPVSNCFN--AEI--LKIYVLT--QFNS--ASLNRHLART--YFNFT--GFHD  
125 MNN--V--LSIILG--GGAGTRFLPFLTKRRAKPAVPLAGKYRL--IDIPVSNCFN--SSI--HKIYVLT--QFNS--ASLNRHLSRS--YFNFS--GFGQ  
126 MKR--V--LAIILG--GGAGTRFLPFLTKMRAKPAVPLAGKYRL--IDIPISNCIN--SGI--NKMYVLT--QFNS--ASLNRHLTQS--YNLSS--GFGQ  
127 MKR--V--LAIILG--GGAGTRFLPFLTKMRAKPAVPLAGKYRL--IDIPISNCIN--SDI--NKMYVLT--QFNS--ASLNRHLTQS--YNLSS--GFGQ  
128 MKR--V--LAIILG--GGAGTRFLPFLTKMRAKPAVPLAGKYRL--IDIPISNCIN--SGI--NKIYVLT--QFNS--ASLNRHLTQS--YNLSA--GFGQ  
129 MKK--V--LSIILG--GGAGTRFLPFLTKLRAKPAVPLAGKYRL--IDIPVSNCFN--SEI--LKIYVLT--QFNS--ASLNRHLSRA--YFNFS--GFTD  
130 MKR--V--LAIILG--GGAGTRFLPFLTKMRAKPAVPLAGKYRL--IDIPISNCIN--SSI--TKMYVLT--QFNS--ASLNRHLSQT--YDLSA--GFGQ  
131 MKR--V--LAIILG--GGAGTRFLPFLTKMRAKPAVPLAGKYRL--IDIPISNCIN--SDI--HKMYVMT--QFNS--ASLNRHLSQT--FNLSN--SFGG  
132 MKR--V--LAIILG--GGAGTRFLPFLTKMRAKPAVPLAGKYRL--IDIPISNCIN--SNI--NKMYVLT--QFNS--ASLNRHLSQT--YNLSA--GFGQ  
133 MRQ--V--TAMILG--GGGRTRFLPFLTKRRAKPAVPIGGCYRL--IDIPVSNCFN--SGI--QHIYILT--QFNS--ASLNRHVSQT--YQFS--RFSB  
134 MKR--V--LAIILG--GGKGSRLYPLTKMRAKPAVPLAGKYRL--IDIPISNCIN--SGI--NKMYVLT--QFNS--ASLNRHIGRT--YNLSA--PFGQ  
135 MKR--V--LAIILG--GGKGSRLYPLTKMRAKPAVPLAGKYRL--IDIPISNCIN--SNI--TKMYVLT--QFNS--ASLNRHLAQT--YNLSS--PFAQ  
136 MKR--V--LAIILG--GGAGTRFLPFLTKRRAKPAVPLAGKYRL--IDIPVSNCFN--SEI--HNIYVLT--QFNS--ASLNRHILART--YTFP--GLTG  
137 MKK--V--LAIILG--GGAGTRFLPFLTKLRAKPAVPLAGKYRL--IDIPVSNCFN--SEI--LKIYVLT--QFNS--ASLNRHLART--YFNFT--GFSD  
138 MKK--V--LSIILG--GGAGTRFLPFLTKLRAKPAVPLAGKYRL--IDIPVSNCFN--SEI--FKIYVLT--QFNS--ASLNRHILART--YFNFT--GFNE  
139 MKR--V--LAIILG--GGAGTRFLPFLTKMRAKPAVPLAGKYRL--IDIPISNCIN--SNI--NKMYVLT--QFNS--ASLNRHLGQS--YNLSA--AFGQ  
140 MRD--V--LAIILG--GGGRTRFLPFLTKRRAKPAVPLAGKYRL--IDIPVSNCFN--SDI--EKIYVLT--QFNS--ASLNRHIVNT--YRLS--PFTG  
141 MRD--V--LAIILG--GGGRTRFLPFLTKRRAKPAVPLAGKYRL--IDIPVSNCFN--SDI--DKIYVLT--QFNS--ASLNRHILART--YRMS--PFTG  
142 MKR--V--LAIILG--GGAGTRFLPFLTKMRAKPAVPLAGKYRL--IDIPISNCIN--SSI--NKMYVLT--QFNS--ASLNRHLGQS--YNLSA--AFGQ  
143 MKR--V--LAIILG--GGAGTRFLPFLTKMRAKPAVPLAGKYRL--IDIPISNCIN--SNI--NKMYVMT--QFNS--ASLNRHLSQT--FNLSA--SFGG  
144 MKK--V--LAIILG--GGAGTRFLPFLTKLRAKPAVPLAGKYRL--IDIPVSNCFN--SEI--FKIYVLT--QFNS--ASLNRHILART--YFNFS--GFSE  
145 MKR--V--LAIILG--GGKGSRLYPLTKMRAKPAVPLAGKYRL--IDIPISNCIN--SNI--HKMYVLT--QFNS--ASLNRHLSQT--YNLSS--PFAQ  
146 MKR--V--LAIILG--GGKGSRLYPLTKMRAKPAVPLAGKYRL--IDIPISNCIN--SGI--KKMYVLT--QFNS--ASLNRHIGRT--YNLNG--PFGQ  
147 MKR--V--LAIILG--GGKGSRLYPLTKMRAKPAVPLAGKYRL--IDIPISNCIN--SDI--SKMYVLT--QFNS--ASLNRHLAQT--YNLSC--PFGQ  
148 MKR--V--LAIILG--GGKGSRLYPLTKMRAKPAVPLAGKYRL--IDIPISNCIN--SGI--EKMYVLT--QFNS--ASLNRHIGRT--YNLNG--PFGQ  
149 MKR--V--LAIILG--GGKGSRLYPLTKMRAKPAVPLAGKYRL--IDIPISNCIN--SGI--NKMYVLT--QFNS--ASLNRHIGRT--YNLSA--PFGQ  
150 MKR--V--LAIILG--GGAGTRFLPFLTKMRAKPAVPLAGKYRL--IDIPISNCIN--SSI--NKMYVLT--QFNS--ASLNRHLSQT--YNLNA--GFGQ  
151 MKR--V--LAIILG--GGAGTRFLPFLTKLRAKPAVPLAGKYRL--IDIPVSNCFN--SEI--TKIYVLT--QFNS--ASLNRHLSRT--YFNFT--GFND  
152 MKR--V--LAIILG--GGKGSRLYPLTKMRAKPAVPLAGKYRL--IDIPISNCIN--SGI--EKMYVLT--QFNS--ASLNRHIGRT--YNLNG--PFGQ  
153 VKR--V--LAIILG--GGAGTRFLPFLTKLRAKPAVPLAGKYRL--IDIPVSNCFN--SEI--VKIYVLT--QFNS--ASLNRHLSRA--YFNFS--GFQE  
154 MKK--V--LAIILG--GGAGTRFLPFLTKLRAKPAVPLAGKYRL--IDIPVSNCFN--SEI--LKIYVLT--QFNS--ASLNRHLART--YFNFT--GFSD  
155 MKN--V--LAIILG--GGAGSRLYPLTKQRAKPAVPLAGKYRL--IDIPVSNCFN--ADI--NKIYVLT--QFNS--ASLNRHLSQT--YNLSS--GFGN



23 G---FVEVLAA--QQS--PENPNWFQ--TADAVR--QYL--WLF--EH---NV--LEFLVLAGDHL--YRMDY--ERFIQAHRE--TDA--DITVAA  
24 G---FVEVLAA--QQS--PENPNWFQ--TADAVR--QCL--WLF--EH---NV--LEFLVLAGDHL--YRMDY--EKFIQAHRE--TDA--DITVAA  
25 G---FVEVLAA--QQS--PENPNWFQ--TADAVR--QYL--WLF--EH---NV--LEFLVLAGDHL--YRMDY--ERFIQAHRE--TDA--DITVAA  
26 G---FVEVLAA--QQS--PENPNWFQ--TADAVR--QYL--WLF--EH---NV--LEFLVLAGDHL--YRMDY--ERFIQAHRE--TDA--DITVAA  
27 G---FVEVFAA--QQS--PENPNWFQ--TADAVR--QYL--WLF--EH---DV--LEYLVLAGDHL--YRMDY--EKVQSHRE--TDA--DITVAA  
28 G---FVEVLAA--QQS--PENPNWFQ--TADAVR--QYL--WLF--EH---NV--LEFLVLAGDHL--YRMDY--ERFIQAHRE--TDA--DITVAA  
29 G---FVEVLAA--QQS--PENPNWFQ--TADAVR--QYL--WLF--EH---NV--LEYLVLAGDHL--YRMDY--EKFIQVHRE--SDA--DITVAA  
30 G---FVEVLAA--QQS--PENPNWFQ--TADAVR--QYL--WLF--EH---NV--LEYLVLAGDHL--YRMDY--ERFIQAHRE--SDA--DITVAA  
31 G---FVEVLAA--QQS--PENPNWFQ--TADAVR--QYL--WLF--EH---NV--LEYLVLAGDHL--YRMDY--EKFIQAHRE--SDA--DITVAA  
32 G---FVEVLAA--QQS--PENPNWFQ--TADAVR--QYL--WLF--EH---NV--MEFLILAGDHL--YRMDY--EKFIQAHRE--TDA--DITVAA  
33 G---FVEVLAA--QQS--PDNPNWFQ--TADAVR--QYL--WLF--EH---NV--MEFLILAGDHL--YRMDY--EKFIQAHRE--TNA--DITVAA  
34 G---FVEVLAA--QQS--PDNPNWFQ--TADAVR--QYL--WLF--EH---NV--MEFLILAGDHL--YRMDY--EKFIQAHRE--TNA--DITVAA  
35 G---FVEVLAA--QQS--PDNPNWFQ--TADAVR--QYL--WLF--EH---NV--MEFLILAGDHL--YRMDY--EKFIQAHRE--TNA--DITVAA  
36 G---FVEVLAA--QQS--PDNPNWFQ--TADAVR--QYL--WLF--EH---NV--MEFLILAGDHL--YRMDY--EKFIQAHRE--TDA--DITVAA  
37 G---FVEVLAA--QQS--PDNPNWFQ--TADAVR--QYL--WLF--EH---NV--MEFLILAGDHL--YRMDY--EKFIQAHRE--TDS--DITVAA  
38 G---FVEVLAA--QQS--PENPNWFQ--TADAVR--QYL--WLF--EH---NV--MEFLILAGDHL--YRMDY--QKFIQAHRE--TNA--DITVAA  
39 G---FVEVLAA--QQS--PDNPNWFQ--TADAVR--QYL--WLF--EH---NV--MEFLILAGDHL--YRMDY--EKFIQAHRE--TDS--DITVAA  
40 G---FVEVLAA--QQS--PDNPNWFQ--TADAVR--QYL--WLF--EH---NV--MEFLILAGDHL--YRMDY--EKFIQAHRE--TDA--DITVAA  
41 G---FVEVLAA--QQS--PDNPNWFQ--TADAVR--QYL--WLF--EH---NV--MEFLILAGDHL--YRMDY--EKFIQAHRE--TDA--DITVAA  
42 G---FVEVLAA--QQS--PDNPNWFQ--TADAVR--QYL--WLF--EH---NV--MEYLILAGDHL--YRMDY--EKFIQAHRE--TDA--DITVAA  
43 G---FVEVLAA--QQS--PENPNWFQ--TADAVR--QYM--WLF--EH---NI--MEFLILAGDHL--YRMDY--QKFIQAHRE--TDA--DITVAA  
44 G---FVEVLAA--QQS--PENPNWFQ--TADAVR--QYL--WLF--EH---NV--MEFLILAGDHL--YRMDY--QKFIQAHRE--TDA--DITVAA  
45 G---FVEVLAA--QQS--PDNPNWFQ--TADAVR--QYL--WLF--EH---NV--MEYLILAGDHL--YRMDY--EKFIQAHRE--TDA--DITVAA  
46 G---FVEVLAA--QQS--PDNPNWFQ--TADAVR--QYL--WLF--EH---NV--MEYLILAGDHL--YRMDY--EKFIQAHRE--TDA--DITVAA  
47 G---FVEVLAA--QQS--PESPDWFQ--TADAVR--QYL--WLF--EH---NV--MEFLILAGDHL--YRMDY--QKFIQAHRE--TDA--DITVAA  
48 G---FVEVLAA--QQS--PDNPNWFQ--TADAVR--QYL--WLF--EH---NV--MEYLILAGDHL--YRMDY--EKFIQAHRE--TDA--DITVAA  
49 G---FVEVLAA--TQTPGEAGKWFQ--TADAVR--KFI--WVFE--DAK--NKN--ENIVLISGDHL--YRMDY--MELVQNHID--RNA--DITLSC  
50 G---FVEVLAA--TQTPGELGKRWFG--TADAVR--QFH--WLF--DAR--SKDI--EDVLILSGDHL--YRMDY--LHFVQSHRQ--SGA--DITISS  
51 G---YVEVLAA--TQTPGELGKRWFG--TADAVR--QFH--WLF--DAR--SKDI--EDVLILSGDHL--YRMDY--LHFVQSHRQ--SGA--DITISS  
52 G---YVEVLAA--TQTPGESGKRWFG--TADAVR--QFH--WLF--DAR--SKDI--EDVLILSGDHL--YRMDY--MDFVQKHID--TNA--DITVSC  
53 G---FVEVLAA--TQTPGELGKRWFG--TADAVR--QFH--WVFE--DAK--TKNV--EHLVILSGDHL--YRMDY--MNFVQKHIE--SNA--DITVSC  
54 G---FVEVLAA--TQTPGEAGKWFQ--TADAVR--KFL--WVFE--DAK--NRNI--ENIILISGDHL--YRMDY--MDFVQHHVD--SKA--DITLSC  
55 G---FVEVLAA--TQTPGEAGKWFQ--TADAVR--KFL--WVFE--DAK--NRNI--ENIILISGDHL--YRMDY--MDFVQSHVD--SNA--DITLSC  
56 G---FVEVLAA--TQTPGEAGKWFQ--TADAVR--KFI--WVFE--DAK--NKN--ENIILISGDHL--YRMDY--MELVQNHID--RNA--DITLSC  
57 G---FVEVLAA--TQTPGELGKRWFG--TADAVR--QFH--WVFE--DAK--NKN--ENIILISGDHL--YRMDY--MDFVQKHID--ANA--DITVSC  
58 G---YVEVLAA--TQTPGELGKRWFG--TADAVR--QFH--WLF--DAR--SKDI--EDVLILSGDHL--YRMDY--LHFVQSHRQ--SGA--DITISS  
59 G---FVEVLAA--TQTPGEAGKWFQ--TADAVR--KFI--WVFE--DAK--NKN--ENIILISGDHL--YRMDY--MELVQNHID--RNA--DITLSC  
60 G---FVEVLAA--TQTPGELGKRWFG--TADAVR--QFH--WVFE--DAK--NKN--ENIILISGDHL--YRMDY--MDFVQKHID--ANA--DITVSC  
61 G---FVEVLAA--TQTPGESGKRWFG--TADAVR--QFH--WLF--DAR--SKDI--EDVLILSGDHL--YRMDY--MDFVQKHID--SGA--DITISS  
62 G---FVEVLAA--TQTPGELGKRWFG--TADAVR--QFH--WVFE--DAK--TKNV--EHLVILSGDHL--YRMDY--MNFVQKHIE--SNA--DITVSC  
63 G---FVEVLAA--TQTPGEAGKWFQ--TADAVR--KFL--WVFE--DAK--NRNI--ENIILISGDHL--YRMDY--MDFVQHHVD--SKA--DITLSC  
64 G---FVEVLAA--TQTPGEAGKWFQ--TADAVR--KFL--WVFE--DAK--NRNI--ENIILISGDHL--YRMDY--MDFVQSHVD--SNA--DITLSC  
66 G---FVEVLAA--TQTPGESGKWFQ--TADAVR--QFL--WLF--DAD--HRNI--ENIILISGDHL--YRMDY--MDFVQKHID--SCA--DITVSC  
67 G---FVEVLAA--TQTPGEAGKWFQ--TADAVR--QFH--WLF--DPR--SKDI--EDVLILSGDHL--YRMDY--MELVQNHRE--SGA--DITLSC  
68 G---FVEVLAA--TKTPGESGKWFQ--TADAVR--RFT--WVFE--DAK--NKDI--ENIILISGDHL--CRMDY--MKLLEKHIG--TNA--DITVSC  
69 G---FVEVLAA--TLTNGEAGKWFQ--TADAVR--RFS--WVFE--DAK--NKN--ENIILISGDHL--CRMDY--MKLLEKHIG--TNA--DITVSC  
70 G---CVEVLAA--TQTPGELGKRWFG--TADAVR--QFT--WVFE--DAK--HTNI--ENVLILAGDHL--YRMDY--MDLVQSHVD--RNA--DITVSC  
71 G---CVEVLAA--TQTPGEAGNWFQ--TADAVR--QFT--WVFE--DAK--HANI--ENVLILAGDHL--YRMDY--MDLVQSHVD--RNA--DITVSC  
72 G---YVEVLAA--TQTPGEAGKWFQ--TADAVR--QFH--WLF--DPR--SKDI--EDVLILSGDHL--YRMDY--MDFVQNHRE--SGA--DITLSC  
73 G---FVEVLAA--TQTPGEAGKWFQ--TADAVR--QFT--WVFE--DAK--NKN--ENIILISGDHL--YRMDY--MDFVQRHVD--TNA--DITVSC  
74 G---IVEVLAA--TQTPGEAGKWFQ--TADAVR--QFT--WVFE--DAK--NTNV--ENVLILAGDHL--YRMDY--MDLVQSHVD--RNA--DITVSC  
75 G---FVEVLAA--TQTPGEAGKWFQ--TADAVR--QFT--WVFE--DAK--NKN--ENIILISGDHL--YRMDY--MNFVQRHVD--TNA--DITVSC  
76 G---IVEVLAA--TQTPGEAGKWFQ--TADAVR--QFT--WVFE--DAK--NTNV--ENVLILAGDHL--YRMDY--MDLVQSHVD--RNA--DITVSC  
77 G---FVEVLAA--TQTPGESGKWFQ--TADAVR--QFL--WLF--DAD--HRNI--ENIILISGDHL--YRMDY--MEIVQRHIN--SCA--DISVSC  
80 G---YVEVLAA--TQTPGEAGKWFQ--TADAVR--QFT--WVFE--DAK--NTNI--ENIILISGDHL--YRMDY--MDLVQSHID--RNA--DITVSC  
81 G---FVEVLAA--TQTPGESGKWFQ--TADAVR--QFT--WLF--DAR--HRNI--ENIILISGDHL--YRMDY--MDFLQKHIE--SGA--DICVSC  
82 G---FVEVLAA--TQTPGEAGKWFQ--TADAVR--QFT--WVFE--DAK--NRNI--ENIILISGDHL--YRMDY--MDFVQHHID--SNA--DFTISC  
84 G---FVEALAA--TQTPGEAGKWFQ--TADAVR--QFH--WLF--GPR--SKEI--EDVLILSGDHL--YRMDY--MDFVQNHRO--GGA--DITLSC  
87 G---FVEVLAA--TQTPGEAGKWFQ--TADAVR--QFH--WLF--DAR--SKDI--DDVLILSGDHL--YRMDY--MDFVQNHRO--SGA--DITISC  
88 G---FVEVLAA--TQTPGESGKWFQ--TADAVR--QFL--WLF--DAK--HSHI--ENIILISGDHL--YRMDY--MDFLQKHID--SGA--DITVSC  
89 G---FVEVLAA--TQTPGEAGMWFQ--TADAVR--QFT--WVFE--DAK--NRNV--ENIILISGDHL--YRMDY--MDFVQHHVD--SNA--DITISC  
90 G---FVEVLAA--TKTPGEAGKWFQ--TADAVR--QFT--WVFE--DAK--NKN--ENVLILSGDHL--YRMDY--MEFVQKHID--SGA--DITVSC  
91 G---FVEVLAA--TQTPGEAGKWFQ--TADAVR--QFT--WVFE--DAK--NKN--ENIILISGDHL--YRMDY--MDFVQKHID--SNA--DITVSC  
92 G---FVEVLAA--TQTPGESGKWFQ--TADAVR--QFT--WLF--DAR--HRNI--ENIILISGDHL--YRMDY--MEFVQKHID--SDA--DISVSC  
94 G---YVEALAA--TQTPGEAGKWFQ--TADAVR--QFH--WLF--DQR--SKEI--EDVLILSGDHL--YRMDY--MDFVQNHRO--SGA--DITISC  
95 G---FVEVLAA--TQTPGEAGKWFQ--TADAVR--KFI--WVFE--DAK--NRNI--ENIILISGDHL--YRMDY--MDLVQNHID--RKA--DITVSC  
96 G---FVEVLAA--TQTPGETGKWFQ--TADAVR--QFT--WVFE--DAR--NKN--EHLVILSGDHL--YRMDY--MEFVQKHID--TNA--DVTVSC  
97 G---FVEVLAA--TQTPGEAGKWFQ--TADAVR--QFT--WVFE--DAK--RSI--ENIILISGDHL--YRMDY--MDFVQHHVD--SNA--DITISC  
98 G---FVEVLAA--TQTPGEAGKWFQ--TADAVR--QFT--WVFE--DAR--TKNV--EHLVILSGDHL--YRMDY--MEFVQKHID--TNA--DITVSC  
99 G---FVEVLAA--TQTPGESGKWFQ--TADAVR--QFD--WLF--DAK--SKDI--EDVLILSGDHL--YRMDY--MDFVQSHRQ--RGA--GISICC  
100 G---SVOVLA--TQMPPEAG--WFG--TADAVR--KFI--WVLE--DYKHKAI--DNIVLISGDHL--YRMDY--MELVQKHVE--DDA--DITISC  
101 G---SVEVLAA--TQMPGEAAG--WFG--TADAVR--KFI--WVLE--DYKHKAI--ENIILISGDHL--YRMDY--MELVQKHVD--DNA--DITLSC  
102 G---SVEVLAA--TQTAGESGKWFQ--TADAVR--QFL--WLF--DAR--LHCI--ENIILISGDHL--YRMDY--MDFVQKHVD--SGA--DISVAC  
103 G---SVEVLAA--TQMPGEAAG--WFRG--TADAVR--KFI--WVLE--DYKHKAI--ENIILISGDHL--YRMDY--MELVQKHVD--DNA--DITLSC  
104 G---FVEVLAA--TQTAGESGKWFQ--TADAVR--QFL--WLF--DAR--LKRI--ENIILISGDHL--YRMDY--MDFVQKHVD--SGA--DISVAC  
105 G---FVEVLAA--TQTPGESGKWFQ--TADAVR--QFD--WLF--DAK--AKDI--EDVILISGDHL--YRMDY--MDFVQSHRQ--RDA--GISICC  
106 G---FVEVLAA--TQTPGESGKWFQ--TADAVR--QFD--WLF--DAK--AKDI--EDVILISGDHL--YRMDY--MDFVQSHRQ--RGA--DISICC  
107 G---SVEVLAA--TQMPGEAAG--WFG--TADAVR--KFI--WVLE--DYKHKAI--ENIILISGDHL--YRMDY--MELVQKHVD--DNA--DITLSC

108 G---FVEVLAA--TQTTGEGSKRWFQG--TADAVR--QFL--WLF--DAR-LKRI--ENILILSGDHL--YRMDY--MDFVQKHVD--KGA--DISVAC  
109 G---SVOVLAA--TQMPDEPAG-WFQG--TADAIR--KFM--WILE--DHYNQNNI--EHVVILCGDQL--YRMDY--MELVQKHVD--DNA--DITLSC  
110 G---SVEVLAA--TQMPGEAAG-WFQG--TADAVR--KFI--WVLE--DYYKHKAI--EHILILSGDQL--YRMDY--MELVQKHVD--DNA--DITLSC  
111 G---SVOVLAD--TQMPDEPDG-WFQG--TADSVR--KFI--WVLE--DYYNHKSI--EHIVILSGDQL--YQMDY--MELVQKHVE--DNA--DITVSC  
112 G---FVEVLAA--TQRPGESEKRWFGQ--TADAVR--QFD--WLF--DAK-SKDI--EDVLILSGDHL--YRMDY--MDFVQSHRQ--RGA--GISICC  
113 G---SVEVLAA--TQMPGEAAG-WFRG--TADAVR--KFI--WVLE--DYYKHKSI--EHILILSGDQL--YRMDY--MELVQKHVD--DNA--DITLSC  
114 G---FVEVLAA--TQRPGESEKRWFGQ--TADAVR--QFA--WLF--DAK-SKDI--EDVLILSGDHL--YRMDY--MDFVQSHRQ--RDA--GISICC  
115 G---SVEVLAA--TQMPGEAAG-WFRG--TADAVR--KFI--WVLE--DYYKHKSI--EHILILSGDQL--YRMDY--MELVQKHVD--DNA--DITLSC  
116 G---FVEVLAA--TQTPGEAGKWFQG--TADAVR--QFH--WLF--DAK-GKEI--EDVLILSGDHL--YRMDY--MDFVQSHRQ--SGA--DITLSC  
117 G---SVEVLAA--TQMPGEAAG-WFRG--TADAVR--KFI--WVLE--DYYKHKSI--EHILILSGDQL--YRMDY--MELVQKHVD--DNA--DITLSC  
118 G---FVEVLAA--TQRPGESEKRWFGQ--TADAVR--QFA--WLF--DAK-SKDI--EDVLILSGDHL--YRMDY--MDFVQSHRQ--RDA--GISICC  
119 G---SVEVLAA--TQMPGEAAG-WFRG--TADAVR--KFI--WVLE--DYYKHKSI--EHILILSGDQL--YRMDY--MELVQKHVD--DNA--DITLSC  
120 G---SVEVLAA--TQMPGEAAG-WFRG--TADAVR--KII--WVLE--DYYKHKSI--EHILILSGDQL--YRMDY--MELVQKHVD--DNA--DITLSC  
121 G---FVEVLAA--QQT--E--PSPS-WFEG--TADAVR--KYQ--WLFQ--EW---DV--DEYLILSGDQL--YRMDY--SLFVEHHRQ--SGA--DLTVAA  
122 G---FAEVLAA--QQT--SVTNPWFGQ--TADAVR--QYL--WLM--EW---DV--EHFLILSGDHL--YRMDY--RDFVQRHID--TGA--DITLSV  
123 G---FVEVLAA--QQT--PENPNWFQG--TADAVR--QYL--WLLN--EW---DA--DEYLILSGDHL--YRMDY--RQFIQRHRE--TGA--DITLSV  
124 G---FVEVLAA--QQT--TENPSWFQG--TADAVR--QYG--WLF--EW---DV--DEYLILSGDHL--YRMDY--SDFVQRHRE--TGA--DITLSV  
125 G---FVEILAA--QQT--PENMNWFQG--TADAVR--QYL--WLF--RA---EA--DEYLILSGDHL--YRMDY--RDFIQRHRE--TNA--DITLSV  
126 G---FVEVLAA--QQT--PSPS-WFEG--TADAVR--KYQ--WLFQ--EW---DV--DHYLILSGDQL--YRMDY--STFVDHHA--TGA--DVSIGA  
127 G---FVEVLAA--QQT--PSPS-WFEG--TADAVR--KYQ--WLFQ--EW---DV--DHYLILSGDQL--YRMDY--SEFVNHHA--TGA--DISIGA  
128 G---FVEVLAA--QQT--PDSPTWFEG--TADAVR--KYQ--WLFQ--EW---DV--DQYLILSGDQL--YRMDY--SRFVHHIQ--SGA--DLTVGA  
129 G---FTEVLAA--QQT--ASNPNWFQG--TADAVR--QYL--WLF--RA---EA--DYFLILSGDHL--YRMDY--REFVQRHID--TKA--DITLSV  
130 G---FVEVLAA--QQT--PSPS-WFEG--TADAVR--KYQ--WLFQ--EW---DV--DEYLILSGDQL--YRMDY--SLFVEHHRK--SGA--DLTVAA  
131 G---FVEVLAA--QQT--PDSPTWFEG--TADAVR--KYQ--WLFQ--EW---DV--DEYLILSGDQL--YRMDY--SLFLEHHR--TGA--KLTVAA  
132 G---FVEVLAA--QQT--PSPS-WFEG--TADAVR--KYQ--WLFQ--EW---DV--DEYLILSGDQL--YRMDY--SLFINHHR--TGA--DLTVAA  
133 G---FCEILAA--EQT--DENPNWFQG--TADAVR--QYL--WLE--PS---GS--TEYLILSGDHL--YRMDY--SKFVRHRE--TNA--DVTIAV  
134 G---FVEVLAA--QQT--PDSPKWFEG--TADAVR--KYQ--WLFQ--EW---DV--DEYLILSGDQL--YRMDY--SLFVQHRD--NKA--DLTVAA  
135 G---FVEVLAA--QQT--PSPS-WFEG--TADAVR--KYQ--WLFQ--EW---DV--DEYLILSGDQL--YRMDY--SLFVEHHR--TGA--DLTVAA  
136 G---FVEVLAA--QQT--PENPNWFQG--TADAVR--QYL--WLLA--DW---DV--DEYLILSGDHL--YRMDY--RLFVQRHRE--TGA--DVTLSV  
137 G---FVEVLAA--QQT--AENPKWFQG--TADAVR--QYL--WAFQ--EW---DI--DEYLILSGDHL--YRMDY--RDFIQRHRE--TGA--DITLSV  
138 G---FVEVLAA--QQT--PENPNWFQG--TADAVR--QYL--WLE--EW---DV--EYLILSGDHL--YRMDY--RQFIQRHRE--TGA--DITLSV  
139 G---FVEVLAA--QQT--PSPS-WFEG--TADAVR--KYQ--WLFQ--EW---DV--DEYLILSGDQL--YRMDY--SLFVEHHR--SGA--DLTVAA  
140 G---FVDVLA--QQT--PDNDFWFQG--TADAVR--QYL--WLM--SW---KP--RDFILILSGDHL--YRMDY--RFFIHHHRQ--VGA--DVTLAV  
141 G---FVDILAA--QQT--PDNDFWFQG--TADAVR--QYL--WLM--SW---KP--RDFILILSGDHL--YRMDY--RFFIHHHRQ--TGA--DVTLAV  
142 G---FVEVLAA--QQT--PSPS-WFEG--TADAVR--KYQ--WLFQ--EW---DV--DEYLILSGDQL--YRMDY--SLFVEHHR--SGA--DLTVAA  
143 G---FVEVLAA--QQT--PDSPTWFEG--TADAVR--KYQ--WLFQ--EW---DV--DEYLILSGDQL--YRMDY--SLFVEHHR--TGA--DLTVAA  
144 G---FVEVLAA--QQT--PENPNWFQG--TADAVR--QYL--WMLQ--EW---DV--DEFLILSGDHL--YRMDY--RLFIQRHRE--TNA--DITLSV  
145 G---FVEVLAA--QQT--PSPS-WFEG--TADAVR--KYQ--WLFQ--EW---DV--DEYLILSGDQL--YRMDY--SQFVNHHR--TGA--DLTVAA  
146 G---FVEVLAA--QQT--PDSPKWFEG--TADAVR--KYQ--WLFQ--EW---DV--DEYLILSGDQL--YRMDY--SLFVQHRD--NGA--DLTVAA  
147 G---FVEVLAA--QQT--PETPSWFEG--TADAVR--KYQ--WLFQ--EW---DV--DEYLILSGDQL--YRMDY--SLFVEQHRK--TGA--DLTVAA  
148 G---FVEVLAA--QQT--PDSPKWFEG--TADAVR--KYQ--WLFQ--EW---DV--DEYLILSGDQL--YRMDY--SLFVQHRD--NGS--DLTVAA  
149 G---FVEVLAA--QQT--PSPKWFEG--TADAVR--KYQ--WLFQ--EW---DV--DEYLILSGDQL--YRMDY--SLFVQHRD--NGA--DLTVAA  
150 G---FVEVLAA--QQT--LDSPSWFEG--TADAVR--QYL--TLF--EW---DV--DEYLILSGDQL--YRMDY--SRFVEHHR--TGA--DLTVAA  
151 E---FVEVLAA--QQT--AENPSWFQG--TADAVR--QYL--WLM--EW---DV--DEYLILSGDHL--YRMDY--REYIQRHRE--TKA--DITLSV  
152 G---FVEVLAA--QQT--PDSPKWFEG--TADAVR--KYQ--WLFQ--EW---DV--DEYLILSGDQL--YRMDY--SLFVQHRD--NGA--DLTVAA  
153 G---FVEVLAA--QQT--KDNDFWFQG--TADAVR--QYL--WLF--EW---DV--DEYLILSGDHL--YRMDY--AQFVQRHRE--TNA--DITLSV  
154 G---FVEVLAA--QQT--AENPKWFQG--TADAVR--QYL--WAFQ--EW---DI--DEYLILSGDHL--YRMDY--RDFIQRHRE--TGA--DITLSV  
155 G---FVEVLAA--QIT--PENPNWFQG--TADAVR--QYL--WLIK--EW---DV--DEYLILSGDHL--YRMDY--SQFIQRHRE--TNA--DITLSV  
156 G---FVEVLAA--QQT--PENDFWFQG--TADAVR--QYL--WLLS--DW---EV--DYLLILSGDHL--YRMDY--RLFVQRHRE--TNA--DITLSV  
157 G---FVEVLAA--QIT--PENPNWFQG--TADAVR--QYL--WLIK--EW---DV--DEYLILSGDHL--YRMDY--SQFIQRHRE--TNA--DITLSV  
158 G---FVEVLAA--QQT--PDSPTWFEG--TADAVR--KYQ--WLFQ--EW---DV--DEYLILSGDQL--YRMDY--SLFIQHHR--SGA--DLTVAA  
159 G---FVEVLAA--QQT--PDSPTWFEG--TADAVR--KYQ--WLFQ--EW---DV--DEYLILSGDQL--YRMDY--SLFLEHHR--TGA--DLTVAA  
160 G---FVEVLAA--QQT--PDNSWFEG--TADAVR--QYL--QLLQ--EW---DV--DEYLILSGDHL--YRMDY--SRFVQRHRE--TNA--DITLSV  
161 G---FAEVLAA--QQT--PENPNWFQG--TADAVR--QYM--WMA--EQR---DV--DEILILSGDHL--YRMDY--SVFIERHRE--TNA--DITLSV  
162 G---FVEVLAA--QQT--KDNPEWFQG--TADAVR--KYI--WLFK--EW---DI--DYLLILSGDHL--YRMDY--RDFVQRHID--TKA--DITLSV  
163 G---FVEVLAA--QQT--PENPNWFQG--TADAVR--QYL--WMLQ--EW---DV--DEFLILSGDHL--YRMDY--RLFIQRHRE--TNA--DITLSV  
164 G---FVEILAA--QQT--PENMNWFQG--TADAVR--QYL--WLF--RA---EA--DEYLILSGDHL--YRMDY--RDFIQRHRE--TNA--DITLSV  
165 G---FVEVLAA--QQT--TENPSWFQG--TADAVR--QYG--WLF--EW---DV--DEYLILSGDHL--YRMDY--SDFVQRHRE--TGA--DITLSV  
166 G---FTEVLAA--QQT--KENPWFQG--TADAVR--QYS--WLE--DW---DV--DEYLILSGDHL--YRMDY--REFIQRHRE--TGA--DITLSV  
167 G---FVEVLAA--QQT--PDSPKWFEG--TADAVR--KYQ--WLFQ--EW---DV--DEYLILSGDQL--YRMDY--SLFVQHRD--NEA--DLTVAA  
168 G---FVEVLAA--QQT--PETPSWFEG--TADAVR--KYQ--WLFQ--EW---DV--DEYLILSGDQL--YRMDY--SLFVEQHR--TGA--DLTVAA  
169 G---FVEVLAA--QQT--PDSPTWFEG--TADAVR--KYE--WLLQ--EW---DI--DEVLILSGDQL--YRMDY--AHFVAQHR--SGA--DLTVAA  
170 G---FVEVLAA--QQT--PSPS-WFEG--TADAVR--KYQ--WLFQ--EW---DV--DEYLILSGDQL--YRMDY--SLFINHHR--TGA--DLTVAA  
171 G---FVEVLAA--QQT--MENPWFGQ--TADAVR--QYI--WTM--DW---DI--DEYLILSGDHL--YRMDY--SKFIERHRE--TNA--DITLSV  
172 G---FVEVLAA--QQT--PDSPKWFEG--TADAVR--KYQ--WLFQ--EW---DV--DEYLILSGDQL--YRMDY--SLFVQHRD--NEA--DLTVAA  
173 G---FVEVLAA--QQT--PDSPTWFEG--TADAVR--KYQ--WLFQ--EW---DV--DHYLILSGDQL--YRMDY--SRFVQHRD--TGA--DLSVGA  
174 E---FVEVLAA--QQT--PENPNWFQG--TADAVR--QYL--WLM--EW---DI--DEYLILSGDHL--YRMDY--RQFIQRHRE--TNA--DITLSV  
175 G---FVEVLAA--QQT--PENPNWFQG--TADAVR--QYI--WMLQ--DW---DV--DEFLILSGDHL--YRMDY--RLFIQRHRE--TNA--DITLSV  
176 G---FVEILPA--QKT--AENPSWFQG--TADAVR--QYL--WLFN--CW---DV--DEYLILSGDHL--YRMDY--RLFVQRHRE--TGA--DITLSV  
177 G---FVEVLAA--QQT--PENLSWFQG--TADAVR--QYL--WLF--EW---DV--DEYLILSGDHL--YRMDY--RQFIQRHRE--TGA--DITLSV  
178 G---FVEVLAA--QQT--PENPWFQG--TADAVR--QYG--WLF--EW---DV--DEYLILSGDHL--YRMDY--SDFVQRHRE--TGA--DITLSV  
179 G---FVEILAA--QQT--PENMNWFQG--TADAVR--QYL--WLF--RA---EA--DEYLILSGDHL--YRMDY--RDFIQRHRE--TNA--DITLSV  
180 G---FVEVLAA--QQT--LDSPTWFEG--TADAVR--QYL--TLF--EW---DV--DEYLILSGDQL--YRMDY--SRFVEHHR--TGA--DLTVAA  
181 G---FVEVLAA--QQT--KENPSWFQG--TADAVR--QYL--WLFN--EW---DV--DEYLILSGDHL--YRMDY--DDFIQHR--TGA--DITLAV  
182 G---FVEVLAA--QQT--QENPNWFQG--TADAVR--QYL--SLE--QW---DV--DEYLILSGDHL--YRMDY--QKVFQRHRE--TNA--DITLSV  
183 G---FVEVLAA--QQT--KENPNWFQG--TADAVR--QYL--WLF--EW---DI--DHYLILSGDHL--YRMDY--REFVQRHRE--TKA--DITLSV  
184 G---FVEVLAA--QQT--PENPNWFQG--TADAVR--QYI--WMLQ--EW---DV--DEFLILSGDHL--YRMDY--RLFIQRHRE--TNA--DITLSV

185 G---FVEVLAA--QQT--PENPNWFQG--TADAVR--QYI--WMLE--EW---DV--DEFLLILSGDHL--YRMDY--RLFVQRHRE--TNA--DITLSV
186 G---FAEVLAA--QQT--SVTNPQWFQG--TADAVR--QYL--WLME--EW---DV--EHFLILSGDHL--YRMDY--RDFVQRHID--TGA--DITLSV
187 G---FVEVLAA--QQT--AENPSWFQG--TADAVR--QYL--WLFQ--EW---DV--DQYLILSGDHL--YRMDY--SDFVRRHQE--TGA--DITLSV
188 G---FVEVLAA--QQT--PDSPTWFEG--TADAVR--KYQ--WLFQ--EW---DV--DEYLILSGDQL--YRMDY--SLFIEHHRH--SGA--DLTVAA
189 SG---FVEVLAA--TQTPGLGKKEWFQG--TADAVR--QYS--WLFE--DVK--NKDV--QDVLVLSGDHL--YRMDY--MAFVDRHRE--VNA--DITIGC
190 G---FVEVLAA--QQS--SANKSNWFQG--TADAVR--QYM--WLFE--ES---KC--EYIILSGDHL--YRMDY--KFFILKHRK--TGA--DITVSA
191 NG--FVEVLAA--TQTPGLGKKEWFQG--TADAVR--QYS--WLFE--DIK--NKDV--QDVLVLSGDHL--YRMDY--MAFVARHRE--VNA--DITIGC
192 G---FVEVLAA--QQS--PKNKDFQG--TADAVR--QYI--WLFN--ES---KC--DEYIILSGDHL--YRMDY--KFFILKHRQ--TKA--DITVSA
193 DG--FVEVLAA--TQTP--TD--KEWFQG--TADAVR--QYS--WLFE--DTK--NRAI--EDVLVLSGDHL--YRMDY--MKFVNHYRE--TNA--DITIGC
194 G---FVEVLAA--QQS--SANKSNWFQG--TADAVR--QYM--WLFE--EAV--REGV--EDFLILSGDHL--YRMDY--KDFVQRHNR--SGA--AITVAA
195 NG--FVEVLAA--TQTPGOGGKEWFQG--TADAVR--QYS--WLFE--DVK--NKDV--EDIVILAGDHL--YRMDY--MKFVEAHRE--SNA--DISVGT
196 G---FVEVLAA--QQS--PVNKAWFQG--TADAVR--QYL--WLFE--ES---KC--EYLILSGDHL--YRMDY--RPFIMKHRE--TEA--AITVAA
197 G---FVEVLAA--SQS--SANKSNWFQG--TADAVR--QYM--WLFE--EAV--REGV--EDFLILSGDHL--YRMDY--RDFVQRHRE--SGA--AITVAA
198 DG--FVEVLAA--TQTP--TD--KEWFQG--TADAVR--QYS--WLFE--DTK--NRAI--EDVLVLSGDHL--YRMDY--MKFVNHYRE--TNA--DITIGC
199 NG--FVEVLAA--TQTPGOGGKEWFQG--TADAVR--QYS--WLFE--DVK--NKDV--EDIVILAGDHL--YRMDY--MKFVEAHRE--SNA--DITVGT
200 G---FVEVLAA--QQS--PINKAWFQG--TADAVR--QYL--WLFA--ES---GC--EYLILSGDHL--YRMDY--RPFIRDHRA--KNA--DITVAA
201 G---FVEVLAA--TQTPGEAGMNWFQG--TADAVR--QFT--WVFE--DTR--SKEI--ENVLVLSGDHL--YRMDY--MEFIQKHQD--TGA--DITIGC
202 G---FVEVLAA--QQS--PENPNWFQG--TADAVR--QYM--WLFE--EQ---PV--MEYLILAGDHL--YRMDY--QKFIQAHRH--TDA--DITVAA
203 G---FVEVLAA--QQS--PENPNWFQG--TADAVR--QYM--WLFE--EQ---PV--MEYLILAGDHL--YRMDY--QKFIQAHRH--TDA--DITVAA
204 G---FVEVLAA--QQS--PENPNWFQG--TADAVR--QYM--WLFE--EQ---PV--MEYLILAGDHL--YRMDY--QKFIQAHRH--TDA--DITVAA
206 G---FVEVLAA--TQTPGESGMNWFQG--TADAVR--QFT--WVFE--DVR--NKDV--DYVLVLSGDHL--YRMDY--MDFVQKHKD--SGA--DITISC
207 G---FVEVLAA--TQTPGESGMNWFQG--TADAVR--QFT--WVFE--DVR--NKDV--DYVLVLSGDHL--YRMDY--MDFVQKHKD--SGA--DITISC
208 G---FVEVLAA--TQTPGEAGMNWFQG--TADAVR--QFT--WVFE--DTR--SKEI--ENVLVLSGDHL--YRMDY--MEFIQKHQD--TGA--DITIGC
209 G---FVEVLAA--TQTPGEAGMNWFQG--TADAVR--QFT--WVFE--DTR--SKEI--ENVLVLSGDHL--YRMDY--MEFIQKHQD--TGA--DITIGC

210 220 230 240 250 260 270 280 290 300
1 LPM--D--EK RAT--A--FGLMKID--EE--GRIIEFAEK--PKG--EQLQA--MKVDTTILGLDDKR--AKEMP--FIASM--G--IYVISK--DVM
2 LPM--D--EK RAT--A--FGLMKID--EE--GRIIEFAEK--PKG--EQLQA--MKVDTTILGLDDKR--AKEMP--LVASM--G--IYVISK--DVM
3 LPM--D--EK RAT--A--FGLMKID--EE--GRIIEFAEK--PKG--EQLQA--MKVDTTILGLDDKR--AKEMP--FIASM--G--IYVISK--DVM
4 LPM--D--EK RAT--A--FGLMKID--EE--GRIIEFAEK--PKG--EQLQA--MKVDTTILGLDDKR--AKEMP--FIASM--G--IYVISK--DVM
5 LPM--D--EK RAT--A--FGLMKID--EE--GRIIEFAEK--PKG--EHLKA--MKVDTTILGLDDQR--AKEMP--FIASM--G--IYVSR--DVM
6 LPM--D--EK RAT--A--FGLMKID--EE--GRIIEFAEK--PKG--EHLKA--MKVDTTILGLDDKR--AKEMP--YIASM--G--IYVSR--DVM
7 LPM--D--EK RAT--A--FGLMKID--EE--GRIIEFSEK--PKG--DQLQA--MKVDTTILGLDDER--AKEMP--FIASM--G--IYVISK--NVM
8 LPM--D--E ARAT--A--FGLMKID--EE--GRIIEFAEK--PKG--EQLKA--MKVDTTILGLDDER--AKEMP--YIASM--G--IYVSK--HVM
9 LPM--D--E ARAT--A--FGLMKID--EE--GRIIEFAEK--PKG--EQLKA--MKVDTTILGLDDER--AKEMP--YIASM--G--IYVSK--NVM
10 LPM--D--EK RAT--A--FGLMKID--EE--GRIIEFAEK--PKG--EQLKA--MKVDTTILGLDDER--AKEMP--YIASM--G--IYVSK--NVM
11 LPM--D--EK RAT--A--FGLMKID--EE--GRIIEFAEK--PKG--EQLKA--MKVDTTILGLDDER--AKEMP--YIASM--G--IYVSK--NVM
12 LPM--D--EK RAT--A--FGLMKID--EE--GRIIEFAEK--PKG--EQLKA--MKVDTTILGLDDER--AKEMP--YIASM--G--IYVSK--NVM
13 LPM--D--EK RAT--A--FGLMKID--EE--GRIIEFAEK--PKG--EQLKA--MKVDTTILGLDDER--AKEMP--YIASM--G--IYVSK--DVM
14 LPM--D--EK RST--A--FGLMKID--DE--GRIIEFAEK--PKG--EQLKA--MKVDTTILGLDDER--AKEIP--FIASM--G--IYVSK--NVM
15 LPM--D--EK RAT--A--FGLMKID--EE--GRIIEFAEK--PKG--EQLKA--MKVDTTILGLDDER--AKEMP--FIASM--G--IYVSK--DVM
16 LPM--D--E ARAT--A--FGLMKID--EE--GRIVEFSEK--PKG--EQLKA--MKVDTTILGLDDER--AKEMP--YIASM--G--IYVSK--HVM
17 LPM--D--EK RAT--A--FGLMKID--EE--GRIIEFAEK--PKG--EQLKA--MKVDTTILGLDDER--AKEMP--FIASM--G--IYVSK--NVM
18 LPM--D--E LRAT--A--FGLMKID--EE--GRIIEFAEK--PKG--EQLKA--MKVDTTILGLDEER--AKEMP--YIASM--G--IYVSK--HVM
19 LPM--D--EK RAT--A--FGLMKID--EE--GRIIEFAEK--PKG--DQLNA--MKVDTTILGLDDER--AKEMP--FIASM--G--IYVSK--NVM
20 LPM--D--EK RAT--A--FGLMKID--EE--GRIIEFAEK--PKG--EQLKT--MKVDTTILGLDDAR--GKEMP--FIASM--G--IYVSK--DVM
21 LPM--D--EK RAT--A--FGLMKID--EE--GRIIEFAEK--PKG--EQLKA--MKVDTTILGLDDER--AKEMP--YIASM--G--IYVSK--DVM
22 LPM--D--E K LAT--A--FGLMKID--EE--GRIIEFSEK--PKG--EQLKA--MKVDTTILGLDDAR--GKEMP--FIASM--G--IYVSK--DVM
23 LPM--D--EK RAT--A--FGLMKID--EE--GRIIEFSEK--PKG--EQLKA--MKVDTTILGLDDER--AKEMP--YIASM--G--IYVSK--DVM
24 LPM--D--EK RAT--A--FGLMKID--DE--GRIIEFAEK--PKG--EQLKA--MKVDTTILGLDDER--AKEMP--YIASM--G--IYVSK--NVM
25 LPM--D--EK RAT--A--FGLMKID--EE--GRIIEFAEK--PKG--EQLKA--MKVDTTILGLDDQR--AKEMP--YIASM--G--IYVSK--DVM
26 LPM--D--EK RAT--A--FGLMKID--EE--GRIIEFAEK--PKG--EQLKA--MKVDTTIFGLDDQR--AKELP--FIASM--G--IYVSK--NVM
27 LPM--D--EK RAT--A--FGLMKID--DE--GRIIEFSEK--PKG--EALKA--MRVDTTILGLDDER--AKEMP--YIASM--G--IYVSK--NAM
28 LPM--D--E KRPT--A--FGLMKID--EE--GRIIEFAEK--PKG--EQLKA--MKVDTTILGLDDKR--AKEMP--YIASM--G--IYVSK--DVM
29 LPM--D--E NRAT--A--FGLMKID--EE--GRIIEFAEK--PKG--EQLKA--MKVDTTIFGLDDER--AKEMP--YIASM--G--IYVSK--NVM
30 LPM--D--E ARAT--A--FGLMKID--EE--GRIIEFSEN--PKG--EQLKA--MKVDTTILGLDDDR--AKEMP--YIASM--G--IYVSK--HVM
31 LPM--D--EK RAT--A--FGLMKID--EE--GRIIEFAEK--PKG--EQLKA--MKVDTTILGLDDER--AKEMP--FIASM--G--IYVSK--NVM
32 LPM--D--E QRAT--A--FGLMKID--DE--GRIVEFAEK--PKG--EK LRS--MMVDTTILGLDPER--AKELP--YIASM--G--IYVSK--DVM
33 LPM--D--EK RAT--A--FGLMKID--EE--GRIIEFAEK--PKG--EQLKA--MMVDTTILGLDDVR--AKEMP--YIASM--G--IYVSK--DVM
34 LPM--D--EK RAT--A--FGLMKID--EE--GRIIEFAEK--PKG--EQLKA--MMVDTTILGLDDVR--AKEMP--YIASM--G--IYVSK--DVM
35 LPM--D--EK RAT--A--FGLMKID--EE--GRIIEFAEK--PKG--EQLKA--MMVDTTILGLDDVR--AKEMP--YIASM--G--IYVSK--DVM
36 LPM--D--EK RAT--A--FGLMKID--EE--GRIIEFAEK--PKG--DQLKA--MMVDTTILGLDDER--AKEMP--YIASM--G--IYVSK--DVM
37 LPM--D--EK RAT--A--FGLMKID--EE--GRIVEFAEK--PKG--EQLKA--MMVDTTILGLDDVR--AKEMP--YIASM--G--IYVSK--NVM
38 LPM--D--E ERAT--A--FGLMKID--DE--GRIIEFAEK--PKG--EKLKS--MMVDTTILGLDTER--AKELP--YIASM--G--IYVSK--DVM
39 LPM--D--EK RAT--A--FGLMKID--EE--GRIVEFAEK--PKG--EQLKA--MMVDTTILGLDDVR--AKEMP--YIASM--G--IYVSK--NVM
41 LPM--D--E ERAT--A--FGLMKID--EE--GRIIEFAEK--PKG--EQLKA--MMVDTTILGLDDVR--AKEMP--YIASM--G--IYVSK--HVM
42 LPM--D--E ERAT--A--FGLMKID--EE--GRIVEFAEK--PKG--EQLKA--MMVDTTILGLDDVR--AKEMP--YIASM--G--IYVSK--HVM
43 LPM--D--E QRAT--A--FGLMKID--DE--GRIVEFAEK--PKG--EK LRS--MMVDTTILGLDPER--AKELP--YIASM--G--IYVSK--DVM
44 LPM--D--E ERAT--A--FGLMKID--DE--GRIVEFSEK--PKG--EK LKA--MMVTTILGLDSER--AKELP--YIASM--G--IYVSK--DAM
45 LPM--D--E ERAT--A--FGLMKID--EE--GRIIEFAEK--PKG--EQLKA--MMVDTTILGLEDA--AKEMP--YIASM--G--IYVSK--HVM
46 LPM--D--E ERAT--A--FGLMKID--EE--GRIVEFAEK--PKG--EQLKA--MMVDTTILGLEDA--AKEMP--YIASM--G--IYVSK--HVM
47 LPM--D--E ERAT--A--SGLMKID--DE--GRIVEFSEK--PKG--EK LKA--MMVDTTILGLDSER--AKELP--YIASM--G--IYVSK--DAM
48 LPM--D--E ERAT--A--FGLMKID--EE--GRIIEFAEK--PKG--EQLKA--MMVDTTILGLDDAR--AKEMP--YIASM--G--IYVSK--HVM
49 APA--E--D SRAS--D--FGLVKID--SR--GRVVFQFAEK--PKG--FDLKA--MQVDTTILVGLSPQD--AKKSP--YIASM--G--VYVFT--DVL
50 VPM--D--D GRAS--D--FGLMKID--ET--GAIQFAEK--PKG--PALKA--MQVDTTILGLSEQE--ASNFP--YIASM--G--VYVFT--DVL
51 LPI--D--D SRAS--D--FGLMKID--DT--GRVMSFSEK--PKG--DDLKA--MAVDTTILGLSPEE--AKEKP--YIASI--G--VYVFK--DIL
52 IPI--D--D RRAS--D--FGLMKID--DK--GRVISFSEK--PKG--DDLKA--MAVDTTILGLSKEE--AKEKP--YIASI--G--VYVFK--EIL

53 LPM--D--ESRAS--D--FGLLKID--QS--GRIIQFSEK--PKG--DDLKA--MQVDTISILGLPPE--AAESP--YIASM--G--VYVFRK--EVL  
54 APV--D--ESRAS--E--YGLVNIID--RS--GRVVFHSEK--PTG--IDLKS--MQVDTTMMHGLSHQE--AAKSP--YIASM--G--VYCFKT--EAL  
55 APV--S--ESRAS--N--FGLVKID--RG--GRVIHFSEK--PTG--VDLKS--MQVDTTMLGSLHQE--ATDSP--YIASM--G--VYCFKT--EAL  
56 APA--E--DSRAS--D--FGLVKID--SR--GRVVQFAEK--PKG--FDLKA--MQVDTTLVGLSPQD--AKKSP--YIASM--G--VYVFKT--DVL  
57 VPM--D--DGRAS--D--FGLMKID--ET--GRIIQFAEK--PKG--PALKV--MQVDTISILGLSEQE--ASNFP--YIASM--G--VYVFKT--DVL  
58 LPI--D--DSRAS--D--FGLMKID--DT--GRVMSFSEK--PKG--DDLKA--MQVDTTLVGLSPEE--AKEKP--YIASM--G--VYVFKK--DIL  
59 APA--E--DSRAS--D--FGLVKID--SR--GRVVQFAEN--QR--FELKA--MLVDTSLVGLSPQD--AKKSP--YIASM--G--VYVFKT--DVL  
60 VPM--D--DGRAS--D--FGLMKID--ET--GRIIQFVEK--PKG--PALKV--MQVDTISILGLSEQE--ASNFP--YIASM--G--VYVFKT--DVL  
61 IPI--D--DRRAS--D--FGLMKID--DK--GRVISFSEK--PRG--DELKA--MAVDTTILGLSKEE--AEKPP--YIASM--G--VYVFKK--EIL  
62 LPM--D--ESRAS--D--FGLLKID--QS--GRIIQFSEK--PKG--DDLKA--MQVDTISILGLPPE--AAESP--YIASM--G--VYVFRK--EVL  
63 APV--D--ESRAS--D--YGLVNIID--RS--GRVVFHSEK--PTG--IDLKS--MQVDTTMMHGLSHQE--AAKSP--YIASM--G--VYCFKT--EAL  
64 APV--S--ESRAS--N--FGLVKID--RG--GRVIHFSEK--PTG--VDLKS--MQVDTTMLGSLHQE--ATDSP--YIASM--G--VYCFKT--EAL  
66 LPV--D--GSRAS--D--FGLVKVD--ER--GQIQFLEK--PKG--ELLRS--MHVDTISIFGLSAQE--ARFPP--YIASM--G--IYVFKI--DVL  
67 LPM--D--DSRAS--D--FGLMRID--NK--GRILSFSEK--PKG--EELKA--MQVDTTLVGLSKDE--AQKPP--YIASM--G--VYVFKK--EIL  
68 VPM--D--ESRAS--D--YELMKID--RK--GQITQFVEK--PEG--SDLQA--MHVDTTLGLTAE--AQYTP--YIAPM--G--VSVFRT--ETL  
69 VPM--D--ESRAS--D--YELMKID--RK--GRIQFVEK--PEG--SDLKA--MHVDTTLGLTAE--AQYTP--YIAPM--G--VSVFRT--ETL  
70 AAV--G--ESRAS--D--YGLVKAD--GR--GRIIQFSEK--PKG--ADLKA--MQVDTSVLGLPPE--AKRSP--YIASM--G--VYVFKT--DVL  
71 AAV--G--ESRAS--D--YGLVKAD--AR--GRIIQFSEK--PNG--ADLKA--MQVDTSVLGLPPE--AKRSP--YIASM--G--VYVFKT--DVL  
72 LPM--D--DSRAS--D--FGLMKID--NK--GRVLSFSEK--PKG--EELKA--MQVDTTLVGLSKDE--AQKPP--YIASM--G--VYVFKK--EIL  
73 VPM--D--DSRAS--D--YGLMKID--KT--GRIIQFAEK--PKG--SDLKA--MRVDTTLGLLPQE--AEKHP--YIASM--G--VYVFKT--ETL  
74 AAV--G--DSRAS--D--YGLVKVD--DR--GRIIQFSEK--PKG--DDLKA--MQADTSLLGLSSQD--ALESP--YIASM--G--VYVFKT--DVL  
75 VPM--D--DSRAS--D--YGLMKID--KT--GRIIQFAEK--PKG--SDLKA--MRVDTTLGLSPQE--AEKYP--YIASM--G--VYVFKT--ETL  
76 AAV--G--DSRAS--D--YGLVKVD--DR--GRIIQFSEK--PNG--DDLKA--MQADTSLLGLSPQD--ALKSP--YIASM--G--VYVFKT--DVL  
77 LPV--D--GSRAS--D--FGLVKVD--ER--GQIQFLEK--PKG--ELLRS--MHVDTISIFGLSAQE--ARFPP--YIASM--G--IYVFKI--DVL  
80 AAV--G--DSRAS--D--YGLVKVD--SG--GRIIQFSEK--PKG--ADLKS--MQADTSIFGLSNQD--ALRSP--YIASM--G--VYVFKT--DVL  
81 LPV--N--DSRAS--D--FGLVKID--ET--GQIQFLEK--PKG--ENLKS--MQVDTTLVGLSAQE--ANFPP--YIASM--G--IYMFKT--DVL  
82 AAV--G--ESRAS--D--YGLVKID--GR--GQVQFAEK--PKG--SELRE--MRVDTTLGLSPQD--AMKSP--YIASM--G--VYVFKT--DIL  
84 LPM--D--DSRAS--D--FGLMKID--NK--GRVLSFSEK--PKG--VDLKA--MEVDTTLVGLSKEE--ALKPP--YIASM--G--VYVFKK--EIL  
87 LPM--D--DSRAS--D--FGLMNID--NK--GRVLSFSEK--PKG--ADLKA--MAVDTTLVGLSKEE--AEKPP--YIASM--G--VYVFKK--EIL  
88 LPV--D--ESRAS--D--FGLKID--ET--GQIQFLEK--PKG--ESLKS--MRVDTTLGLSISD--ARKLP--YIASM--G--IYMFKT--DVL  
89 AAV--G--ESRAS--D--YGLVKID--SR--GRIVHFAEK--PGG--AELKS--LKADTTQLGLSPQD--ALKSP--YIASM--G--VYVFKT--EIL  
90 VPM--D--DSRAS--D--YGLMKID--NT--GRIIQFAEK--PKG--LDLKA--MQIDTKLLGLSKQD--ALQYP--YIASM--G--VYVFKT--EVL  
91 VPM--D--DSRAS--D--YGLMKID--NT--GRIIQFSEK--PKG--PNLKA--MKVNTTLGLSKEE--AEKCP--YIASM--G--IYVFKT--DVL  
92 LPM--D--ESRAS--D--FGLKID--EM--GQIQFLEK--PKG--ETLKS--MRVDTTLGLSPVE--AKKFP--YIASM--G--IYVFKT--DVL  
94 LPM--D--DSRAS--D--FGLMKID--NK--GRVLSFSEK--PKG--EDLKA--MEVDTKVLGLSREE--AEKPP--YIASM--G--VYVFKK--EIL  
95 VPV--G--ESRAS--D--YGLLKID--NR--GRIIQFAEK--PKG--ADLKA--MKVDTTLGLSPQE--AMKSP--YIASM--G--VYVFKT--DIL  
96 VPM--D--DSRAS--D--YGLMKID--NT--GRIVQFAEK--PKG--PDLKA--MQVDTTLGLSROE--AMQFP--YIASM--G--VYVFKT--DVL  
97 VAV--G--ESRAS--D--YGLVKID--SK--GQIFTEK--PKG--SELRE--MQVDTTLGLSPQD--ALKSP--YIASM--G--VYVFKT--DIL  
98 VPM--D--DSRAS--D--YGLMKID--ST--GRIIQFAEK--PKG--TDLKA--MQVDTTLGLSROE--AMQFP--YIASM--G--VYVFKT--DVL  
99 LPI--D--GSRAS--D--FGLMKID--DT--GRVISFSEK--PKG--DELKA--MQVDTTLVGLSKEE--AENKP--YIASM--G--IYVFKK--DIL  
100 APV--D--ESRAS--K--NGLVKID--HT--GRVLFQFEK--PKG--ADLNS--MRVETNFLSYAIDD--AQKYP--YIASM--G--IYVFKK--DAL  
101 APV--G--ESRAS--D--YGLVKFD--SS--GRVIQFSEK--PKG--AALEE--MKVDTSFNFAIDTLP--AEYK--YIASM--G--VYVFKR--DVL  
102 VPM--D--ESRAS--D--FGLMKAD--RN--GRITDFLEK--PKG--ADLES--MQVDMGLFGLSPEF--ASTYK--YIASM--G--IYVFKR--DVL  
103 APV--G--ESRAS--E--YGLVKFD--SS--GRVIQFSEK--PKG--VDLEA--MKVDTSFNFAIDD--PAKFP--YIASM--G--VYVFKR--DVL  
104 VPM--D--ESRAS--D--FGLMKID--RN--GRITDFLEK--PKG--ESLKS--MVVDMEIFGLSPEV--ANVYN--YIASM--G--IYVFKT--DVL  
105 LPI--D--DSRAS--D--FGLMKID--DT--GRVISFSEK--PKG--DDLKA--MQVDTTLVGLSKEE--AEKPP--YIASM--G--VYVFKK--EIL  
106 LPI--D--DSRAS--D--FGLMKID--DT--GRVIAFSEK--PKG--DDLKA--MQVDTTLVGLPQDE--AKEKP--YIASM--G--VYVFKK--EIL  
107 APV--G--ESRAS--D--YGLVKFD--SS--GRVIQFSEK--PKG--TDLEA--MKVDTSFNFAIDD--PTKFP--YIASM--G--VYVFKR--DVL  
108 VPV--D--ESRAS--D--FGLMKID--KN--GRITDFLEK--PKG--ESLKS--MQLDMGTFLRPEV--ADTCK--YIASM--G--IYVFKT--DIL  
109 API--D--GSRAS--D--YGLVKFD--DS--GRVIFLEK--PEG--ADLES--MKVDTSFNFAIDD--KQKYP--YIASM--G--IYVFKK--DVL  
110 APV--G--ESRAS--D--YGLVKFD--SS--GRVIQFSEK--PKG--AALEE--MKVDTSFNFAIDD--PTKYP--YIASM--G--VYVFKR--DVL  
111 APV--D--ESRAS--N--NGLVKCD--HT--GRVLFQFEK--PKG--ADLNS--MRVDTNFLSYAIGD--AQKYP--YIASM--G--IYVFKK--DAL  
112 LPI--D--DSRAS--D--FGLMKID--DT--ARVISFSEK--PKG--DELKA--MQVDTTLVGLSKEE--AEKPP--YIASM--G--VYVFKK--DIL  
113 APV--G--ESRAS--E--YGLVKFD--SS--GRVIQFSEK--PKG--DDLEA--MKVDTSFNFAIDD--PAKYP--YIASM--G--VYVFKR--DVL  
114 LPI--D--DSRAS--D--FGLMKID--DT--GRVISFSEK--PKG--ADLKA--MQVDTTLGLLPKEE--AEKPP--YIASM--G--VYVFKK--EIL  
115 APV--G--ESRAS--E--YGLVKFD--SS--GRVIQFSEK--PKG--DDLEA--MKVDTSFNFAIDD--PAKYP--YIASM--G--VYVFKR--DVL  
116 VPM--D--VSRAS--D--FGLMKID--NN--GRVLSFSEK--PKG--QELKA--MEVDTSVLGLSREQ--AKKTP--YIASM--G--VYVFKK--EIL  
117 APV--G--ESRAS--E--YGLVKFD--SS--GRVIFSEK--PKG--DDLEA--MKVDTSFNFAIDD--PAKYP--YIASM--G--VYVFKR--DVL  
118 LPI--D--GSRAS--D--FGLMKID--DT--GRVISFSEK--PRG--ADLKA--MQVDTTLGLLPKEE--AEKPP--YIASM--G--VYVFKK--EIL  
119 APV--G--ESRAS--E--YGLVKFD--SS--GRVVQFSEK--PKG--DDLEA--MKVDTSFNFAIDD--PAKYP--YIASM--G--VYVFKR--DVL  
120 APV--G--ESRAS--E--YGLVKFD--SS--GRVVQFSEK--PKG--DDLEA--MKVDTSFNFAIDD--PAKYP--YIASM--G--VYVFKR--DVL  
121 LPV--D--PQAE--A--FGLMRID--AH--GTIQFSEK--PKG--DSLKE--MAVDTSRFGLSPES--AEQPP--YIASM--G--IYVFSR--KAL  
122 LPV--D--EKRAS--S--FGLMKID--EST--GRIIDFSEK--PKG--EALKQ--MAVDTSTLGLSPEE--AAESP--YIASM--G--IYVFKK--DVL  
123 IPI--D--KSRAS--D--FGLMKID--QS--GRVIDFSEK--PKG--DELDR--MQVDTSVLGLSPEQ--AKLQP--YIASM--G--IYVFKK--DVL  
124 VPI--D--EKRAS--S--FGLMKIN--DN--GRIVDFSEK--PKG--EELKQ--MQVDTISILGLNPEQ--AKESP--YIASM--G--IYVFKK--KAL  
125 LPV--D--EKQAS--S--FGLMKID--DT--GRIIDFSEK--PKG--DDLKR--MQVDTTTLGLSABE--SKIKP--YIASM--G--IYVFKK--EVL  
126 LPV--D--AAQAE--G--FGLMHTN--EH--GRIFREFREK--PKG--EALKE--MWVDTSKLGLSADE--ALRPP--YIASM--G--IYVFSR--ETL  
127 LPV--D--APQAE--A--FGLMHTD--EK--GKIREFREK--PKG--DALKE--MWVDTSRGLSPEE--AEKRP--YIASM--G--IYVFSR--ETL  
128 LPV--D--AEQAE--G--FGLMRID--LD--GRIFREFREK--PKG--AALEA--MKVDTARLGLAEAE--ATRRP--YIASM--G--IYVFSR--DIL  
129 LPI--D--EKRAS--D--FGLMKIN--DT--GRIIDFSEK--PKG--DALKK--MAVDTTTLGLSABE--AKESP--YIASM--G--IYVFNK--EVL  
130 LPV--D--PQAE--A--FGLMRID--EH--GTIQFSEK--PKG--DSLKE--MAVDTSRFGLSPES--AQSKP--YIASM--G--IYVFSR--KAL  
131 LPV--D--AKQAE--S--FGLMRID--SE--GNIQEFREK--PKG--DSLLE--MAVDTSRFGLSPES--AQERP--YIASM--G--IYVFSR--ETL  
132 LPV--D--AKQAE--A--FGLMRID--QD--GRILEFSEK--PKG--DSLLE--MAVDTSRFGLSADS--AKERP--YIASM--G--IYVFSR--DIL  
133 LPC--D--LERAS--D--FGLIKTD--AD--GRVIFTEK--PKG--AELER--MRVDTTTLGLTLEE--AERRP--YIASM--G--IYVFRH--DVM  
134 LPV--D--ESQAE--G--FGLMRID--DL--GNIKFSEK--PTG--EKLKS--MAVDTSKFGLTKES--ASEKP--YIASM--G--IYVFSR--KIL  
135 LPV--D--GAQAE--G--FGLMRID--ND--GNIREFSEK--PSG--EALKA--MAVDTSRFGLSPDS--AKERP--YIASM--G--IYVFSR--STL  
136 LPV--E--EKAAS--G--FGLLKVD--GT--GRVDFREK--PTG--DALRD--MRVDTTRYGLTIEE--AHRKP--YIASM--G--IYVFKR--QVL

137 VPI--D--EERAS--S--FGLMKID--DH--GRVDFSEK--PKG--DELKQ--MQVDTTVLGLTPEQ--AKESP--YIASM--G--IYVFKK--EVL  
138 IPI--D--ERRAS--D--FGLMKID--DS--GRIIDFSEK--PKG--EALTO--MQVDTSVLGLTKEQ--AQKQP--YIASM--G--IYVFKK--EVL  
139 LPV--D--AEQAE--G--FGLMRTD--SD--GNIQEFREK--PKG--ESLKA--MAVDTSRFGLSAES--AKNKP--YLASM--G--IYVFSR--ATL  
140 LPC--E--EKVAS--G--FGLLKID--EN--GRIVDFEKE--PTG--DLLKA--CQVDTQALGLSPEE--AKAKP--YIASM--G--IYVFKR--EAL  
141 LPC--E--EKVAS--G--FGLLKID--AD--GRIVDFEKE--PKG--ELLKA--CQVDTQALGLSPEE--AKAKP--YIASM--G--IYVFSR--EAL  
142 LPV--D--AEQAE--G--FGLMRTD--SD--GNIQEFREK--PKG--ESLKA--MAVDTSRFGLSAES--ARNKP--YLASM--G--IYVFSR--ATL  
143 LPV--D--PKQAE--A--FGLMRTD--GD--GDIKEFREK--PKG--DSLLE--MAVDTSRFGLSANS--AKERP--YLASM--G--IYVFSR--DTL  
144 IPI--D--DRRAS--D--FGLMKID--NS--GRVIDFSEK--PKG--EALTK--MRVDTTVLGLTPEQ--AASQP--YIASM--G--IYVFKR--DVL  
145 LPV--D--SSQAE--A--FGLMRTD--GE--GNIKEFREK--PTG--DSLKA--MAVDTSRFGLTQAS--AKERP--YLASM--G--IYVFSR--ATL  
146 LPV--D--EAQAE--G--FGLMRTD--DL--GNIKEFSEK--PTG--EKLKA--MAVDTSKFGLSKES--AAEKP--YLASM--G--IYVFSR--NTL  
147 LPV--D--SAQAE--A--FGLMRTD--EA--GNIKEFREK--PTG--DSLKA--MAVDTSRFGLEANE--AKEKP--YLASM--G--IYVFSR--STL  
148 LPV--D--EAQAE--G--FGLMRTD--DV--GNIKEFSEK--PSG--EKLKA--MAVDTSKFGLSKES--AAEKP--YLASM--G--IYVFSR--NTL  
149 LPV--D--EAQAE--G--FGLMRTD--DL--GNIKEFSEK--PTG--EKLKS--MAVDTSKFGLTKEA--ALEKP--YLASM--G--IYVFSR--KTL  
150 LPV--D--AAQAE--A--FGLMRTD--EV--GNIKEFREK--PKG--DSLKA--MAVDTSRFGLSVES--SKERP--YLASM--G--IYVFSR--KTL  
151 VPI--D--EKRAS--S--FGLMKID--DN--ARVDFSEK--PKG--EALRQ--MQVDTSVLGLSPEQ--ARKNP--YIASM--G--IYIFNR--EVL  
152 LPV--D--EAQAE--G--FGLMRTD--DL--GNIKEFSEK--PTG--EKLKA--MAVDTSKFGLTKEA--AAEKP--YLASM--G--IYVFSR--NTL  
153 VPV--D--DRKAP--E--LGLMKID--AQ--GRITDFSEK--PKG--EALRA--MQVDTSVLGLSPEE--AKLNP--YIASM--G--IYVFKK--EVL  
154 VPI--D--EERAS--D--FGLMKID--DH--GRVDFSEK--PKG--DELKQ--MQVDTTVLGLTPEQ--AKESP--YIASM--G--IYVFKK--EVL  
155 LPI--D--EKRAS--D--FGLMKID--GS--GRVDFSEK--PKG--DELRA--MQVDTTILGLDPVA--AAQAP--FIASM--G--IYVFKR--DVL  
156 LPV--E--EQVAS--S--FGLLQVD--HS--GRVDFSEK--PKG--EALTR--MRVDTTDFGLTPAE--AAHQP--YLASM--G--IYVFNK--QVL  
157 LPI--D--EKRAS--D--FGLMKID--GS--GRVDFSEK--PKG--DELRA--MQVDTTILGLDPVA--AAQAP--FIASM--G--IYVFKR--DVL  
158 LPV--D--PKQAE--A--FGLMRTD--EN--GSIKEFREK--PKG--DSLLE--MAVDTSRFGLSVES--AKERP--YLASM--G--IYVFSR--QTL  
159 LPV--D--AKQAE--S--FGLMRTD--SD--GNIQEFREK--PKG--DSLRE--MAVDTSRFGLTPEA--AQERP--YLASM--G--IYVFSR--DTL  
160 VPM--D--ERRAS--A--FGLMKID--ES--GRVDFSEK--PSG--DELTO--MQVDTTILGLSPEE--AQEQP--YIASM--G--IYVFKK--EVL  
161 LPI--D--AYRAP--A--FGLMKID--ESS--GRVDFSEK--PKG--EELER--MKVDTTILGLTPEE--AQEQP--FIASM--G--IYVFKK--DVL  
162 LPI--D--ERAS--E--FGVMKID--NS--GRVIDFSEK--PKG--NALKA--MAVDTSILGVSPET--ATKQP--YIASM--G--IYVFNK--DAM  
163 IPI--D--DRRAS--D--FGLMKID--NS--GRVIDFSEK--PKG--EALTK--MRVDTTVLGLTPEQ--AASQP--YIASM--G--IYVFKK--DVL  
164 LPV--D--EKQAS--S--FGLMKID--NT--GRIIDFSEK--PKG--DDLKR--MEVDTTKLGLSQAQ--AKMKP--YIASM--G--IYLFKR--EVL  
165 VPI--D--EKRAS--S--FGLMKID--DN--GRVDFSEK--PKG--EELKQ--MQVDTSVLGLNPEQ--AKESP--YIASM--G--IYVFKK--KAL  
166 VPV--G--EKVAP--A--FGLMKID--AN--GRVDFSEK--PTG--EALKA--MQVDTQSLGLDPEQ--AKEKP--YIASM--G--IYVFKK--QVL  
167 LPV--D--EGQAE--G--FGLMRTD--DL--GNIKEFSEK--PTG--KLLKA--MAVDTSKFGLSKYS--AAEKP--YLASM--G--IYVFSR--NTL  
168 LPV--D--PAQAE--A--FGLMRTD--EI--GNIKEFREK--PTG--DSLKA--MAVDTSRFGLEANE--AKEKP--YLASM--G--IYVFSR--STL  
169 LPV--D--REQAE--S--FGLMHTG--AE--ASITKFEK--PKG--EALDE--MSCDTASMGLSAAE--AHRP--FLASM--G--IYVFKR--DVL  
170 LPV--D--AKQAE--A--FGLMRTD--ED--GRILEFREK--PKG--DSLLE--MAVDTSRFGLSAES--AKERP--YLASM--G--IYVFSR--DTL  
171 VPI--D--ERRAS--A--FGVMKIN--DS--GRIVDFYK--PKG--AELER--MRVDTTILGLSPEQ--ARQSP--YIASM--G--IYVFKK--NVL  
172 LPV--D--EGQAE--G--FGLMRTD--DL--GNIKEFSEK--PTG--EKLKA--MAVDTSKFGLSKDS--AAKPP--YLASM--G--IYVFSR--NTL  
173 LPV--D--PVQAE--A--FGLMRTD--GE--GHIQEFREK--PKG--EALKA--MRVDTQSLGLSPEE--AAKPP--HLASM--G--IYVFSR--DTL  
174 VPI--D--EKRAS--S--FGLMKID--DN--GRVIDFSEK--PKG--DALQO--MQVDTTILGLSPEQ--ARKSP--YIASM--G--IYVFKK--DVL  
175 IPI--D--DYRAS--D--FGLMKID--NS--GRVIDFSEK--PKG--EALAQ--MRVDTTVLGLTKEQ--AELQP--YIASM--G--IYVFKK--DVL  
176 VPI--D--ETRAS--S--FGLMQIN--DR--GRVIDFREK--PTG--ELLKQ--MQVDTTVLGLTPEE--ARNSP--YIASM--G--IYVFSK--AVM  
177 IPI--D--ERRAS--D--FGLMKIN--ES--GRVDFSEK--PKG--EALKK--MRVDTTVLGLNPEQ--AEQPP--YIASM--G--IYVFKK--DVL  
178 VPI--D--EKRAS--S--FGLMKID--DN--GRVDFSEK--PKG--EELKQ--MQVDTSVLGLNPEQ--AKESP--YIASM--G--IYVFNK--KAL  
179 LPV--D--EKQAS--S--FGLMKID--NT--GRIIDFSEK--PKG--DDLKR--MEVDTTKLGLSQAQ--AKMKP--YIASM--G--IYLFKR--EVL  
180 LPV--D--AAQAE--A--FGLMRTD--ND--GNIKEFREK--PKG--DSLKE--MAVDTSRFGLSAES--SKERP--YLASM--G--IYVFSR--KTL  
181 VPV--N--KTRAS--C--LGLTKIN--NQ--GRVDFSEK--PSE--NELNQ--MQCKSSILGLSKEQ--AIKPP--YIASM--G--IYVFNK--KVL  
182 LPM--D--EKRAS--D--FGLMKID--DK--GRVDFSEK--PKG--DALQO--MQVDTTILGLTPEQ--AQESP--YIASM--G--IYVFKK--EVL  
183 LPM--D--DKRAS--D--FGLMKID--ED--GRVDFSEK--PKG--EALKE--MQVDTTILGLTAEQ--AKESP--YIASM--G--IYVFNK--DVL  
184 IPI--D--GRRAS--D--FGLMKID--SA--GRVIDFSEK--PKG--EALAK--MQVDTTVLGLTSEE--ARSQP--YIASM--G--IYVFKK--DVL  
185 IPI--D--GRRAS--D--FGLMKID--NG--GRVIDFSEK--PKG--EALAK--MQVDTTILGLTSEE--ARSQP--YIASM--G--IYVFKK--DVL  
186 LPV--D--EKRAS--A--FGLMKID--EST--GRIIDFSEK--PKG--EALQO--MAVDTSILGLSPEE--AAESP--YIASM--G--IYVFKK--DVL  
187 VPI--D--ERRAS--S--FGLMKID--DS--GRVDFSEK--PKG--DALQO--MQVDTSVLGLNPEQ--AKESP--YIASM--G--IYVFNK--KAL  
188 LPV--D--PKQAE--A--FGLMRTD--EN--GSIKEFREK--PKG--DSLLE--MAVDTSRFGLSADS--AKERP--YLASM--G--IYVFSR--KTL  
189 LPM--D--GERAS--D--FGLMKID--KT--GRITFAEK--PEG--NDLLA--MQVDTTVLGLSPEE--SQASP--YIASM--G--IYVFKK--SAL  
190 VPM--D--AARAE--A--FGLMKID--DS--GRIIDFAEK--PKG--KELEA--MAVDTTILGLDCKL--AKEMP--YIASM--G--IYVFKK--SAM  
191 LPM--D--DKRAS--D--FGLMKID--DT--GRITFAEK--PNG--DALKA--MEVDTTILGLTAE--ATSSP--YIASM--G--IYVFKK--SAL  
192 VPM--D--EERAA--A--FGLMKID--DT--GRIIDFAEK--PTG--DALKA--MMVDTTILGLDAER--AKEMP--YIASM--G--IYVFNK--RAM  
193 IAY--G--SDRAK--E--FGLMKID--EK--RRVTSFAEK--PKTQ--EALDA--MKVDTTVLGLTPEE--AAEKP--YIASM--G--IYVFKK--SVL  
194 LPC--A--EKEAS--A--FGLMKID--EE--GRVDFSEK--PKG--EALTK--MRVDTGILGVDPAT--AAAKP--YIASM--G--IYVMSA--KAL  
195 LPI--D--EARAS--D--FGLMKID--ST--GRVDFSEK--PKG--DALQA--MQVDTTVLGLTAE--AKEKP--FIASM--G--IYVFKK--SAL  
196 LPC--D--EKRAS--S--FGLMKID--NT--GRVDFSEK--PKG--AELQA--MKVDTTVLGLDADK--AQEMP--FIASM--G--IYVFDK--KKM  
197 LPC--A--EKEAS--A--FGLMKID--DA--GRVDFSEK--PKG--EALQR--MKVDTSVLGLDADK--AQSKP--FIASM--G--IYVMSA--KAL  
198 IAY--G--SDRAK--E--FGLMKID--DK--RRVTSFAEK--PKTQ--EALDA--MKVDTTVLGLTPEE--AADKP--YIASM--G--IYVFKK--SVL  
199 LPI--D--EERAS--D--FGLMKID--SS--GRVDFSEK--PKG--DALQA--MQVDTTILGLTAE--AEAKP--FIASM--G--IYVFKK--SML  
200 LPT--D--EKRAS--S--FGLMKIN--EH--ATIEFSEK--PKG--DALKA--MQCDTILGLDAER--AKEMP--YIASM--G--IYVFNK--KAM  
201 VPM--D--DSRAS--D--FGLMKID--AN--GQILYFSEK--PKG--ADLKA--MQVDTTVLGLTPEE--AIEKP--YIASM--G--IYVFKK--DIL  
202 LPM--D--EKRTA--A--FGLMKID--DE--GRITFAEK--PKG--SALKA--MEVDTTILGLDPER--AKEMP--YIASM--G--IYVFSK--DVM  
203 LPM--D--EKRTA--A--FGLMKID--DE--GRITFAEK--PKG--SALKA--MEVDTTILGLDPER--AKEMP--YIASM--G--IYVFSK--DVM  
204 LPM--D--EKRTA--A--FGLMKID--DE--GRITFAEK--PKG--SALKA--MEVDTTILGLDPER--AKEMP--YIASM--G--IYVFSK--DVM  
206 VPV--D--ESRAS--D--FGLVKT--AR--GRIISFSEK--PKG--MDLKA--MQVDTTALGLSREE--AKMP--YIASM--G--IYVFRK--DVL  
207 VPV--D--ESRAS--D--FGLVKT--AR--GRIISFSEK--PKG--MDLKA--MQVDTTALGLSREE--AKMP--YIASM--G--IYVFRK--DVL  
208 VPM--D--DSRAS--D--FGLMKID--AN--GQILYFSEK--PKG--ADLKA--MQVDTTVLGLTPEE--AIEKP--YIASM--G--IYVFKK--DIL  
209 VPM--D--DSRAS--D--FGLMKID--AN--GQILYFSEK--PKG--ADLKA--MQVDTTVLGLTPEE--AIEKP--YIASM--G--IYVFKK--DIL

310 320 330 340 350 360 370 380 390 400  
1 LNLLRD--KFPGANDFGSE--VIPGATS--LGM--RVQAYLY--DGYW--EDI--GT--IEAFYANLGI--TKKVPDFSFYDRSAPIYTQPRYL  
2 LNLLRD--KFPGANDFGSE--VIPGATS--LGM--RVQAYLY--DGYW--EDI--GT--IEAFYANLGI--TKKVPDFSFYDRSAPIYTQPRYL  
3 LNLLRD--KFPGANDFGSE--VIPGATS--LGM--RVQAYLY--DGYW--EDI--GT--IEAFYANLGI--TKKVPDFSFYDRSAPIYTQPRYL



4 LNLLRD--KFPGANDFGSE--VIPGATS---LGM---RVQAYLY---DGYW---EDI---GT---IEAFYANLGI---TKKVPVDFSFYDRSAPIYTQPRYL  
5 LDLLRN--QFPGANDFGSE--VIPGATS---LGL---RVQAYLY---DGYW---EDI---GT---IEAFYANLGI---TKKVPVDFSFYDRSAPIYTQPRYL  
6 LELLRD--KFPGANDFGSE--VIPGATS---LGL---RVQAYLY---DGYW---EDI---GT---IEAFYANLGI---TKKVPVDFSFYDRSAPIYTQPRYL  
7 LDLLRD--QFPGANDFGSE--VIPGATS---IGK---RVQAYLY---DGYW---EDI---GT---IEAFYANLGI---TKKVPVDFSFYDRSSPIYTQPRYL  
8 LDLLRD--KFPGANDFGSE--VIPGATE---LGM---RVQAYLY---DGYW---EDI---GT---IEAFYANLGI---TKKVPVDFSFYDRSSPIYTQPRYL  
9 LDLLRE--KFPGANDFGSE--VIPYVVR---HVCVYS---RVQAYLY---DGYW---EDI---GT---IEAFYANLGI---TKKVPVDFSFYDRSSPIYTQPRYL  
10 LDLLRE--KFPGANDFGSE--VIPGATS---IGMR---NVQAYLY---DGYW---EDI---GT---IEAFYANLGI---TKKVPVDFSFYDRSSPIYTQPRYL  
11 LDLLRE--KFPGANDFGSE--VIPGATS---IGM---RVQAYLY---DGYW---EDI---GT---IEAFYANLGI---TKKVPVDFSFYDRSSPIYTQPRYL  
12 LDLLRD--KFPGANDFGSE--VIPGATS---IGL---RVQAYLY---DGYW---EDI---GT---IEAFYANLGI---TKKPIPDFSFYDRSSPIYTQPRYL  
13 LDLLRD--QFPGANDFGSE--VIPGATS---LGL---RVQAYLY---DGYW---EDI---GT---IEAFYANLGI---TKKVPVDFSFYDRSSPIYTQPRYL  
14 LDLLRD--QFPGANDFGSE--VIPGATD---LGL---RVQAYLY---DGYW---EDI---GT---IEAFYANLGI---TKKVPVDFSFYGRSAPIYTQPRYL  
15 LNLLRE--QFPGANDFGSE--VIPGATS---IGL---RVQAYLY---DGYW---EDI---GT---IEAFYANLGI---TKKVPVDFSFYDRSSPIYTQPRYL  
16 LDLLRD--KFPGANDFGSE--VIPGATE---LGL---RVQAYLY---DGYW---EDI---GT---IEAFYANLGI---TKKVPVDFSFYDRSSPIYTQPRYL  
17 LDLLRD--KFPGANDFGSE--VIPGATS---VGM---RVQAYLY---DGYW---EDI---GT---IEAFYANLGI---TKKVPVDFSFYDRSSPIYTQPRYL  
18 LDLLRE--KFPGANDFGSE--VIPGATN---IGM---RVQAYLY---DGYW---EDI---GT---IEAFYANLGI---TKKVPVDFSFYDRSSPIYTQPRYL  
19 LDLLSD--KFPGANDFGSE--VIPGATS---IGM---RVQAYLY---DGYW---EDI---GT---IEAFYANLGI---TKKVPVDFSFYDRSSPIYTQPRYL  
20 LSLLRD--KFPGANDFGSE--VIPGATS---IGM---RVQAYLY---DGYW---EDI---GT---IEAFYANLGI---TKKVPVDFSFYDRSSPIYTQPRYL  
21 LNLLRD--KFPGANDFGSE--VIPGATS---IGM---RVQAYLY---DGYW---EDI---GT---IEAFYANLGI---TKKVPVDFSFYDRSSPIYTQPRYL  
22 LSLLRD--KFPGANDFGSE--VIPGATS---IGM---RVQAYLY---DGYW---EDI---GT---IEAFYANLGI---TKKPIPDFSFYDRSDPIYTQPRYL  
23 LNLLRD--KFPGANDFGSE--VIPGATS---IGM---RVQAYLY---DGYW---EDI---GT---IEAFYANLGI---TKKPIPDFSFYDRSAPIYTQPRYL  
24 LDLLRE--KFPGANDFGSE--VIPGATS---IGL---RVQAYLY---DGYW---EDI---GT---IEAFYANLGI---TKKPIPDFSFYDSSSPIYTQPRYL  
25 VNLLRQ--KFPGANDFGSE--VIPGATS---IGL---RVQAYLF---DGYW---EDI---GT---IEAFYANLGI---TKKVPVDFSFYDRSSPIYTQPRYL  
26 LNLLRE--KFPGANDFGSE--VIPGATS---IGM---RVQAYLF---DGYW---EDI---GT---IEAFYANLGI---TKKVPVDFSLYDRSAPIYTQPRYL  
27 LNLLRD--KFPGANDFGSE--VIPGATS---VGL---RVQAYLY---DGYW---EDI---GT---IEAFYANLGI---TKKVPVDFSFYDRSAPIYTQPRYL  
28 LNLLRD--EFPAANDFGSE--VIPGATA---MGL---RVQAYLF---DGYW---EDI---GT---IEAFYANLGI---TKKVPVDFSFYDRSAPIYTQPRYL  
29 LNLLRE--KFPANDFGSE--VIPGATS---IGL---RVQAYLY---DGYW---EDI---GT---IEAFYANLGI---TKKVPVDFSFYDRSSPIYTQPRYL  
30 LDLLRD--KFPGANDFGSE--VIPGATE---LGM---RVQAYLY---DGYW---EDI---GT---IEAFYANLGI---TKKVPVDFSFYDRSSPIYTQPRYL  
31 LDLLRD--KFPGANDFGSE--VIPGATS---IGM---RVQAYLY---DGYW---EDI---GT---IEAFYANLGI---TKKVPVDFSFYDRSSPIYTQPRYL  
32 LRLRE--NFPAANDFGSE--VIPGATE---IGL---RVQAYLY---DGYW---EDI---GT---IEAFYANLGI---TKKVPVDFSFYDRSAPIYTQPRYL  
33 LQLLRE--QFPEANDFGSE--VIPGATS---IGK---RVQAYLY---DGYW---EDI---GT---IAAFYANLGI---TKKPIPDFSFYDRFAPIYTQPRHL  
34 LQLLRE--QFPEANDFGSE--VIPGATS---IGK---RVQAYLY---DGYW---EDI---GT---IAAFYANLGI---TKKPMDFSFYDRFAPIYTQPRHL  
35 LQLLRE--QFPEANDFGSE--VIPGATS---IGK---RVQAYLY---DGYW---EDI---GT---IAAFYANLGI---TKKPMDFSFYDRFAPIYTQPRHL  
36 LQLLRE--QFPGANDFGSE--VIPGATS---IGK---RVQAYLY---DGYW---EDI---GT---IEAFYANLGI---TKKPIPDFSFYDRSAPIYTQPRHL  
37 LQLLRE--QFPGANDFGSE--VIPGATN---IGM---RVQAYLY---DGYW---EDI---GT---IEAFYANLGI---TKKVPVDFSFYDRSAPIYTQPRHL  
38 LKLLRQ--NFPAANDFGSE--VIPGATE---IGM---RVQAYLY---DGYW---EDI---GT---IEAFYANLGI---TKKVPVDFSFYDRSAAIYTQPRYL  
39 LQLLRE--QFPGANDFGSE--VIPGATN---IGM---RVQAYLY---DGYW---EDI---GT---IEAFYANLGI---TKKVPVDFSFYDRSAPIYTQPRHL  
40 LQLLRE--QFPGANDFGSE--VIPGATS---TGM---RVQAYLY---DGYW---EDI---GT---IEAFYANLGI---TKKPIPDFSFYDRSAPIYTQPRHL  
41 LQLLRE--QFPGANDFGSE--VIPGATS---TGM---RVQAYLY---DGYW---EDI---GT---IEAFYANLGI---TKKPIPDFSFYDRSAPIYTQPRHL  
42 LQLLRE--QFPGANDFGSE--VIPGATS---TGM---RVQAYLY---DGYW---EDI---GT---IEAFYANLGI---TKKPIPDFSFYDRSAPIYTQPRHL  
43 LRLRE--NFPAANDFGSE--VIPGATE---IGL---RVQAYLY---DGYW---EDI---GT---IEAFYANLGI---TKKVPVDFSFYDRSAPIYTQPRYL  
44 LRLLRD--NFPSANDFGSE--VIPGATE---IGM---RVQAYLY---DGYW---EDI---GT---IEAFYANLGI---TKKVPVDFSFYDRSAPIYTQSRYL  
45 LQLLRE--QFPGANDFGSE--VIPGATS---TGM---RVQAYLY---DGYW---EDI---GT---IEAFYANLGI---TKKPIPDFSFYDRSAPIYTQPRHL  
46 LQLLRE--QFPGANDFGSE--VIPGATS---TGM---RVQAYLY---DGYW---EDI---GT---IEAFYANLGI---TKKPIPDFSFYDRSAPIYTQPRHL  
47 LRLLRD--NFPSANDFGSE--VIPGATE---IGM---RVQAYLY---DGYW---EDI---GT---IEAFYANLGI---TKKVPVDFSFYDRSAPIYTQSRYL  
48 LQLLRE--QFPGANDFGSE--VIPGATS---TGM---RVQAYLY---DGYW---EDI---GT---IEAFYANLGI---TKKPIPDFSFYDRSAPIYTQPRHL  
49 LKLLKW--SYPTSNDFGSE--IIPAAID---D-Y---NVQAYIF---KDYW---EDI---GT---IKSFYNASLAL---TQEF-PEQFYDPKTPFYTSPRFL  
50 LNLLKS--AYPSCNDFGSE--IIPSAVK---D-H---NVQAYLF---NDYW---EDI---GT---VKSFFDANLAL---TKQP-PKFDNDPKTPFYTSARFL  
51 LNLLRW--RFPTANDFGSE--IIPASTK---E-F---CVKAYLF---NDYW---EDI---GT---IRSFEEANLAL---TEHP-PRFSFYDATKPIYTSRRNL  
52 LNLLRW--RFPTANDFGSE--IIPSAK---E-F---YVNAYLF---NDYW---EDI---GT---IRSFEEANLAL---TEHP-GAFSFYDAAKPIYTSRRNL  
53 LKLLRS--SYPTSNDFGSE--IIPAVG---E-H---NVQAYLF---NDYW---EDI---GT---IGSFFDANLAL---TEQP-PKFQFYDQKTPFYTSPRFL  
54 LKLLTW--RYPSSNDFGSE--IIPAAIK---D-H---NVQYIY---RDYW---EDI---GT---IKSFYEANLAL---VEEH-PKFEFYDQNTPFYTSPRFL  
55 LNLLTR--QYPSSNDFGSE--VIPAAIR---D-H---DVQGYIF---RDYW---EDI---GT---IKTFYEANLAL---VEER-PKFEFYDQNTPFYTSPRFL  
56 LKLLKW--SYPTSNDFGSE--IIPAAID---D-Y---NVQAYIF---KDYW---EDI---GT---IKSFYNASLAL---TQEF-PEQFYDPKTPFYTSPRFL  
57 LKLLKS--AYPSCNDFGSE--IIPSAVK---D-H---NVQAYLF---NDYW---EDI---GT---VKSFFDANLAL---TKQP-PKFDNDPKTPFYTSARFL  
58 LNLLRW--RFPTANDFGSE--IIPASTK---E-F---CVKAYYL---FNDYW---EDI---GT---IRSFEEANLAL---TEHP-PRFSFYDATKPIYTSRRNL  
59 LKLLKW--SYPTSNDFGSE--IIPAAID---D-Y---NVQAYIF---KDYW---EDI---GT---IKSFYNASLAL---TQEF-PEQFYDQKTPFYTSPRFL  
60 LNLLKS--AYPSCNDFGSE--IIPSAVK---D-H---NVQAYLF---NDYW---EDI---GT---VKSFFDANLAL---TKQP-PKFDNDPKTPFYTSARFL  
61 LNLLRW--RFPTANDFGSE--IIPSAK---E-F---YVNAYLF---NDYW---EDI---GT---IRSFEEANLAL---TEHP-GAFSFYDAAKPIYTSRRNL  
62 LKLLRS--SYPTSNDFGSE--IIPAVR---E-H---NVQAYLF---NDYW---EDI---GT---IGSFFDANLAL---TEQP-PKFQFYDQKTPFYTSPRFL  
63 LKLLTW--RYPSSNDFGSE--IIPAAIR---D-H---NVQYIY---RDYW---EDI---GT---IKSFYEANLAL---VEEH-PKFEFYDQNTPFYTSPRFL  
64 LNLLTR--QYPSSNDFGSE--VIPAAIR---D-H---DVQGYIF---RDYW---EDI---GT---IKTFYEANLAL---VEER-PKFEFYDQNTPFYTSPRFL  
65 LKLLRW--CYPNANDFGSE--VIPMAAK---D-F---NVQACLF---NGYW---EDI---GT---IKSFEEANLAL---MDQR-PKFQLYDQSKPIFTCPRFL  
66 LNLLRW--RFPTANDFGSE--IIPASAR---E-F---YMKAYLF---NDYW---EDI---GT---IRSFEEANLAL---TEHP-PRFSFYDAKPMYTSRRNL  
67 LKLLRW--SCPSCNDFGSE--IIPASLR---D-H---KVQAYMF---RDYW---KDI---GT---IKSFEEANLAL---TKQS-PNFEFYDQESPFYTSPRFL  
68 LKLLRW--SCPSCNDFGSE--IIPASLR---D-H---KVQAYMF---RDYW---KDI---GT---IKSFEEANLAL---TKQS-PNFEFYDQESPFYTSPRFL  
69 LKLLRW--SCPSCNDFGSE--IIPASLR---D-H---KVQAYMF---RDYW---KDI---GT---IKSFEEANLAL---TKQS-PNFEFYDQESPFYTSPRFL  
70 LKLLKW--RYPTSNDFGSE--IIPAAVR---E-N---NVQAYFF---NDYW---EDI---GT---IKSFYDANLAL---TEEN-PMFKFYDQKTPFYTSPRFL  
71 LRLLRD--RYPTSNDFGSE--IIPAAVR---E-N---NVQAYFF---IDYW---EDI---GT---IKSFYDANLAL---TEEN-PMFKFYDQKTPFYTSPRFL  
72 LNLLRW--RFPTANDFGSE--IIPASAR---E-F---YMKAYLF---NDYW---EDI---GT---IRSFEEANLAL---TEHP-PRFSFYDAKPMYTSRRNL  
73 LQLLRW--KCSSCNDFGSE--IIPASVN---E-H---NVQAYLF---NDYW---EDI---GT---IKSFFDANLAL---TEQP-PKFEFYDQKTPFYTSPRFL  
74 LNLLKW--RYPTSNDFGSE--IIPAAVR---D-H---NVQSYFF---GDYW---EDI---GT---IKSFYANLAL---TEES-HKFEFYDQKPIYTSRPGFL  
75 LQLLRW--NGSSCNDFGSE--IIPASVN---E-H---NVQAYLF---NDYW---EDI---GT---IKSFFDANLAL---TEQP-PKFEFYDQKTPFYTSPRFL  
76 LNLLKW--RYPTSNDFGSE--IIPAAVR---D-H---DVQSYFF---EDYW---EDI---GT---IKSFYDANLAL---TEES-HKFEFYDQKPIYTSRPGFL  
77 RKVLRG--CYPNANDFGSE--VIPMAAK---D-F---NVQACLF---NGYW---EDI---GT---IKSFFDANLAL---MDQR-PKFQLYDQSKPIFTCPRFL  
78 LKLLKW--RYPTSNDFGSE--IIPASVK---E-Y---NVQAYFF---GDYW---EDI---GT---IKSFYDANLAL---TEES-PMFKFYDQKTPFYTSRPGFL  
79 LKLLRW--NYPTANDFGSE--IIPMSTK---E-Y---NVQAYLF---NGYW---EDI---GT---IKSFFDANLAL---TDQP-PNHFHFDPLKPIFTSPRFL  
80 LKLLRW--RYPTSNDFGSE--IIPASVK---E-Y---NVQAYFF---GDYW---EDI---GT---IKSFYDANLAL---TEES-PMFKFYDQKTPFYTSRPGFL  
81 LKLLRW--NYPTANDFGSE--IIPMSTK---E-Y---NVQAYLF---NGYW---EDI---GT---IKSFFDANLAL---TDQP-PNHFHFDPLKPIFTSPRFL  
82 LKLLRW--RYPTANDFGSE--IIPAAVM---E-H---NVQAYIF---KDYW---EDI---GT---IKSFYEANLAL---AEEP-PKFEFYDQKTPFYTSRPFSL  
83 LKLLRW--RYPTANDFGSE--IIPAAVM---E-H---NVQAYIF---KDYW---EDI---GT---IKSFYEANLAL---AEEP-PKFEFYDQKTPFYTSRPFSL  
84 LNLLRW--RFPTANDFGSE--IIPASAK---E-F---YMKAYLF---NDYW---EDI---GT---IRSFEEANLAL---TEHP-PRFSFYDAKPMYTSRRNL  
85 LNLLRW--RFPTANDFGSE--IIPASAK---E-F---YMKAYLF---NDYW---EDI---GT---IRSFEEANLAL---TEHP-PRFSFYDAKPMYTSRRNL

88 LKLLRW--HYPTANDFGSE--IIPLSAK--D-Y---NVRAYLF---NDYW--EDI--GT--IKSFFDSNLAL--TDQP-PEFQFFDPLKPIFTSPRFL  
89 LKLLRW--RFPTSNDFGSE--IIPAAVM--E-H---NIQSYNF---RDYW--EDI--GT--IKSFYEANLAL--TEEP-PTFEFYDPTKPFYTSRFL  
90 CKLLRW--SYPSCIDFGSE--VIPYAVK--D-H---NVQAYLF---NDYW--EDI--GT--IKSFFDANLAL--TEQP-PKFEFYDPTKPFYTSRFL  
91 LKLLTR--KYLSCNDFGSE--IIPLAVK--D-H---NVQAYLF---NDYW--EDI--GT--IKSFFDANLAL--TEQP-PKFEFYDPTKPFYTSRFL  
92 LKLLRW--SYPTANDFGSE--VIPMAAE--E-C---NVQAYLF---NGYW--EDI--GT--IKSFFDANLAL--TDQP-PKHFHYDPLKPIFTSPRFL  
94 LNLLRW--RFPTSNDFGSE--IIPASAK--E-F---FIKAYLF---NDYW--EDI--GT--IRSFYEANLAL--TAHP-IRSFYDANKPMYTSRRNL  
95 LNLLRW--RYPTSNDFGSE--IIPLAVM--E-H---NVEAFLE---RDYW--EDI--GT--IKTFYEANMGL--TEEF-PKFEFYDPTKPIFTSPRFL  
96 LKLLRW--SYPSCNDFGSE--IIPSAVR--D-H---NVQAYLF---NDYW--EDI--GT--VKSFFDANLGL--TKQP-PKFEFYDPTKPFYTSRFL  
97 LKLLRW--RFPTSNDFGSE--IIPAAVM--E-H---NVQAYIF---KDYW--EDI--GT--IKSFYEANLAL--AEEP-PKFEFYDPTKPFYTSRFL  
98 LKLLRC--SYPSCNDFGSE--IIPSAVK--E-H---NVQAYLF---NDYW--EDI--GT--IKSLFDANLAL--TEQP-PKFEFYDPTKPFYTSRFL  
99 LNLLRW--RFPTANDFGSE--IIPASAK--E-I---DVKAYLF---NDYW--EDI--GT--IKSFFEANLAL--AEQP-PRFSFYDADKPMYTSRRNL  
100 LDLLKS--KYTQLHDFGSE--ILPRAVL--D-H---SVQACIF---TGYW--EDV--GT--IKSFFDANLAL--TEQP-SKDFDYDPTKPFYTSRFL  
101 LDLLKS--RYAELHDFGSE--ILPKALH--E-H---NVQAYVF---TDYW--EDI--GT--IRSFDDANMAL--CEQP-PKFEFYDPTKPFYTSRFL  
102 RKLLRG--HYPTANDFGL--VIPMAAK--D-Y---DVQAYLF---DGYW--EDI--GT--IKSFFEANLAL--TDQS-PNFHYDVPKPIFTSPRFL  
103 LNLLKS--RYAELHDFGSE--ILPRALH--E-H---NVQAYVF---TDYW--EDI--GT--IRSFDDANMAL--CEQP-PKFEFYDPTKPFYTSRFL  
104 LRLLRG--HYPTANDFGSE--VIPMAAK--D-Y---NVQAYLF---DGYW--EDI--GT--IKSFFEANLAL--TDQS-PNFHYFEPVKPIFTSPRFL  
105 LNLLRW--RFPTANDFGSE--IIPAAK--E-I---NVKAYLF---NDYW--EDI--GT--IKSFFEANLAL--AEQP-PRFSFYDANKPMYTSRRNL  
106 LNLLRW--RFPTANDFGSE--IIPASAK--E-I---NVKAYLF---NDYW--EDI--GT--IKSFFEANLAL--AEQP-PRFSFYDANKPMYTSRRNL  
107 LNLLKS--RYAELHDFGSE--ILPRALH--E-H---NVQAYVF---ADYW--EDI--GT--IRSFDDANMAL--CEQP-PKFEFYDPTKPFYTSRFL  
108 LRLLRG--HYPTANDFGSE--VIPMAAK--D-Y---NVQAYLF---DGYW--EDI--GT--IKSFFEANLAL--TDQS-PNFYFYDVPKPIFTSPRFL  
109 LDILKS--KYAHLQDFGSE--ILPRAVL--E-H---NVKACVF---TEYW--EDI--GT--IKSFFDANLAL--TEQP-PKFEFYDPTKPFYTSRFL  
110 LDLLKS--RYAELHDFGSE--ILPKALH--E-H---NVQAYVF---TDYW--EDI--GT--IRSFDDANMAL--CEQP-PKFEFYDPTKPFYTSRFL  
111 LDLLKS--KYTQLHDFGSE--ILPRAVL--E-H---NVQTCIF---MGYW--EDV--GT--IKSFFDANLAL--TEQP-SKDFDYDPTKPFYTSRFL  
112 LNLLRW--RFPTANDFGSE--IIPAAK--E-I---NVKAYLF---NDYW--EDI--GT--IKSFFEANLAL--AEQP-PRFSFYDADKPMYTSRRNL  
113 LNLLKS--RYAELHDFGSE--ILPRALH--D-H---NVQAYVF---TDYW--EDI--GT--IRSFDDANMAL--CEQP-PKFEFYDPTKPFYTSRFL  
114 LNLLRW--RFPTANDFGSE--IIPAAAR--E-I---NVKAYLF---NDYW--EDI--GT--IKSFFEANLAL--AEQP-PKFEFYDANKPMYTSRRNL  
115 LNLLKS--RYAELHDFGSE--ILPRALH--D-H---NVQAYVF---TDYW--EDI--GT--IRSFDDANMAL--CEQP-PKFEFYDPTKPFYTSRFL  
116 LNLLRW--RFPTANDFGSE--IIPASAK--E-L---FVKAYLF---NDYW--EDI--GT--IKSFCEANLSL--TRHP-PNFSFYDANKPMYTSRRNL  
117 LNLLKS--RYAELHDFGSE--ILPRALH--D-H---NVQAYVF---TDYW--EDI--GT--SDPSFDANMAL--CEQP-PKFEFYDPTKPFYTSRFL  
118 LNLLRW--RFPTANDFGSE--IIPAAAR--E-I---NVKAYLF---NDYW--EDI--GT--IKSFFEANLAL--AEQP-PKFEFYDANKPMYTSRRNL  
119 LNLLKS--RYAELHDFGSE--ILPRALH--D-H---NVQAYVF---TDYW--EDI--GT--IRSFDDANMAL--CEQP-PKFEFYDPTKPFYTSRFL  
120 LNLLKS--RYAELHDFGSE--ILPRALH--D-H---NVQAYVF---TDYW--EDI--GT--IRSFDDANRAL--CEQP-PKFEFYDPTKPFYTSRFL  
121 IDLLND--HPQKDFGKE--VIPAAAL--GGM---TLKSYVF---DDYW--EDI--GT--IGAFYEANLAL--TQQPSPFFSFYDEDFPIYTRPRYL  
122 FKLLKD---APDQDFGKE--VIPGAAL--D-H---NVQAYLF---NDYW--EDI--GT--IEAFFEANLAL--TQQPQPPFFSFYDENAPIYTRPRYL  
123 IKLLKE---SLQSTDFGKE--IIPDASK--D-Y---NVQAYLF---DDYW--EDI--GT--IEAFYHANLAL--TKQPLPPFFSFYDEKAPIYTRPRYL  
124 NDLLKN---NPEQDFGKE--IIPGAAL--D-Y---NLQAYLF---KGYW--EDI--GT--IEAFYEANLAL--NRQPRPFFSFYNEKAPIYTRARNL  
125 IDLLKQ---QPDCTDFGKE--IIPNAIK--D-L---NIQAYLF---NDYW--EDI--GT--IEAFFANLAL--AKQPNPFFSFYDKAAPIYTRARYL  
126 FDLLAK---NPTATDFGKE--IIPEAALS--RGD---NLQSFLE---DDYW--EDI--GT--IGAFYEANLAL--TQQPNPFFSFYDEKAPIYTRPRYL  
127 FDLLAK---NPSATDFGKE--LIPASLE--RGD---HIQSYLF---DDYW--EDI--GT--IGAFYEANLAL--TDQPNPFFSFYDEKAPIYTRPRYL  
128 FDLLAQ---NPGSTDFGKE--IIPALG--QGD---NLQAYLF---DDYW--EDI--GT--IGAFYEANLAL--TDQPRPFFSFYDEKAPIYTRPRYL  
129 IKLLTE---TEQDFGKE--IIPNAAP--D-Y---NLQAYLF---NDYW--EDI--GT--IEAFYANLAL--TQQPQPPFFSFYDEKAPIYTRPRYL  
130 FDLLND---HPTYKDFGKE--VIPAALS--KGM---SLKSYVF---DDYW--EDI--GT--IGAFYEANLAL--TQQPKPFFSFYDEKAPIYTRPRYL  
131 FDLLDK---HPGHKDFGKE--IIPALK--RGD---KLQSYVF---DDYW--EDI--GT--IGAFYEANLAL--TQQPTPPFFSFYDEKAPIYTRPRYL  
132 FDLLHQ---NPTHKDFGKE--IIPBALA--RGD---RLKSYVF---DDYW--EDI--GT--IGAFYEANLAL--TQQPTPPFFSFYDEKAPIYTRPRYL  
133 LKLLRD---DPSRTDFGKE--IIPACL--D-Y---NVQAYLF---DDYW--EDI--GT--IEAFYKANLAL--TSQNAPPFFSFYHP-APIYTRPRYL  
134 FDLLNK---FPSYDFGKD--IIPEAALS--RGD---TLKSYVF---DDYW--EDI--GT--IGAFFESNLAL--TQQPKPFFSFYDEKAPIYTRPRYL  
135 FDLLNK---FPSYDFGKE--VIPAALS--RGD---ALKSYVF---DAYW--EDI--GT--IGAFYENLAL--TQQPTPPFFSFYDEKAPIYTRPRYL  
136 IDLLQO---MADATDFGKE--IIPAAAR--S-H---LVQTYLF---NGYW--EDI--GT--IGSFYEANLAL--TQQPQPPFFSFYDENAPIYTRPRYL  
137 AQLLEE---NPDQDFGKE--IIPFSAK--D-Y---NLQAYLF---KGYW--EDI--GT--IKAFYEANLAL--NRQPSRFFSFYNEEYPIYTRSRYL  
138 FKLLRE---SVERTDFGKE--IIPDASK--D-Y---NVQAYLF---DDYW--EDI--GT--IEAFYHANLAL--TQQPQPPFFSFYDEHAPIYTRARYL  
139 FDLLHK---NPSHKDFGKE--VIPBALA--RGD---NLQSYVF---DEYW--EDI--GT--IGAFYEANLAL--TQQPNPFFSFYDEKAPIYTRPRYL  
140 IEMLKV---KEHTDFGKE--VLPAAIG--K-Y---HLQAYLF---KGYW--EDI--GT--IEAFYRANLAL--VQQPNPFFSFYDESEMPIYTRPRFL  
141 IEMLKV---KEHTDFGKE--VLPAAIG--K-Y---HLQAYLF---KGYW--EDI--GT--IEAFYRANLAL--VQQPNPFFSFYDESEMPIYTRPRFL  
142 FDLLHK---NPSHKDFGKE--VIPBALA--RGD---RLQSYVF---DEYW--EDI--GT--IGAFYEANLAL--TQQPNPFFSFYDEKAPIYTRPRYL  
143 FDLLDS---NPGYDFGKE--IIPALK--RGD---KLQSYVF---DDYW--EDI--GT--IGAFYEANLAL--TQQPTPPFFSFYDEKAPIYTRPRYL  
144 IKLLKE---ALERTDFGKE--IIPDAK--D-H---NVQAYLF---DDYW--EDI--GT--IEAFYANLAL--TQQPMPPFFSFYDEEAPIYTRARYL  
145 FDLLNK---HPNYKDFGKE--VIPALN--RGD---VLKSYVF---DDYW--EDI--GT--IGAFFESNLAL--TQQPKPFFSFYDEKAPIYTRPRYL  
146 FDLLNK---FPNYTDFGKD--IIPALN--RGD---TLKSYVF---DDYW--EDI--GT--IGAFFESNLAL--TEQPKPFFSFYDEKAPIYTRPRFL  
147 FDLLNK---FPSYDFGKE--IIPALG--RGD---KLQSYVF---NDYW--EDI--GT--IGAFFESNLAL--TQQPTPPFFSFYDEKAPIYTRPRYL  
148 FDLLNK---FPNYTDFGKD--IIPALN--RGD---TLKSYVF---DDYW--EDI--GT--IGAFFESNLAL--TEQPKPFFSFYDEKAPIYTRPRFL  
149 FDLLNK---FPNYTDFGKD--IIPALG--RGD---NLKSYVF---DDYW--EDI--GT--IGAFFESNLAL--TRQPKPFFSFYDEKAPIYTRPRYL  
150 FDLLDA---NPGHKDFGKE--VIPAALS--RGD---NLKSYVF---DDYW--EDI--GT--IGAFYEANLAL--TQQPTPPFFSFYDEAFPIYTRPRYL  
151 GKLLRQ---NPEQDFGKE--IIPGAKT--D-Y---NLQAYLY---KGYW--EDI--GT--IEAFYENLAL--TQQPQPPFFSFYDEKAPIYTRPRYL  
152 FDLLNK---FPNYTDFGKD--IIPALK--RGD---TLKSYVF---DDYW--EDI--GT--IGAFFESNLAL--TEQPKPFFSFYDEKAPIYTRPRFL  
153 HNLLKE---YEGATDFGKE--IIPDSAS--D-H---NLQAYLF---DDYW--EDI--GT--IEAFYEANLAL--TKQPSDFSFYNEKAPIYTRGRYL  
154 AQLLEE---NPDQDFGKE--IIPFSAK--D-Y---NLQAYLF---KGYW--EDI--GT--IKAFYEANLAL--NRQPSRFFSFYNEEYPIYTRSRYL  
155 IDLLSH---HPEQDFGKE--VIPAAAT--R-Y---NTQAFLE---NDYW--EDI--GT--IASFYENLAL--TQQPQPPFFSFYDEKAPIYTRARYL  
156 IDLLKQ---SPQSTDFGKE--IIPMAAT--D-H---NVQTYLF---NDYW--EDI--GT--ISSFYENLAL--TRQPQPPFFSFYDEKAPIYTRPRYL  
157 IDLLSH---HPEQDFGKE--VIPAAAT--R-Y---NTQAFLE---NDYW--EDI--GT--IASFYENLAL--TQQPSPFFSFYDEKAPIYTRARYL  
158 FDLLDK---HPGHKDFGKE--IIPBALA--RGD---KLQSYVF---DDYW--EDI--GT--IGAFYEANLAL--TQQPTPPFFSFYDEKAPIYTRPRYL  
159 FDLLDK---HPGHKDFGKE--IIPALK--RGD---KLQSYVF---DDYW--EDI--GT--IGAFYEANLAL--TQQPTPPFFSFYDEKAPIYTRPRYL  
160 IDLLES---NIAHTDFGKE--VIPTAAA--N-H---NIQAFLE---DDYW--EDI--GT--IEAFYEANLAL--AQQPKPFFSFYDEKAPIYTRARYL  
161 IDLLKN---SPDSTDFGKE--IIPSSAQ--D-Y---NVQAYLF---NDYW--EDI--GT--IEAFYEANLAL--TRQPQPPFFSFYDEKSPYIYTRSRYL  
162 IKLIED---SEDTDFGKE--ILPKSAQ--S-Y---NLQAYPF---QGYW--EDI--GT--IKSFYEANLAL--TQQPQPPFFSFYDEKAPIYTRSRYL  
163 IKLLKE---SLERTDFGKE--IIPDASK--D-H---NVQAYLF---DDYW--EDI--GT--IEAFYANLAL--TQQPMPPFFSFYDEEAPIYTRARYL  
164 IDLLKQ---QPDCTDFGKE--IIPNAIK--D-L---NIQAYLF---NDYW--EDI--GT--IEAFFANLAL--AKQPNPFFSFYDKAAPIYTRARYL  
165 NDLLKN---NPEQDFGKE--IIPGAAL--D-Y---NLQAYLF---KGYW--EDI--GT--IEAFYEANLAL--NRQPRPFFSFYNEKAPIYTRARNL

166 LDLLKE---GKDKTDFGKE--IIPDAAK---D-Y---NVQAYLF---DDYW---ADI---GT---IEAFYEANLGL--TKQPPIPPFSFYDEKAPIYTRARYL  
167 FDLLNK---FPSYTDGKGD--IIPALN---RGD---KLKSYVF---DDYW---EDI---GT---IGAFFESNLAL--TEQPKPPFSFYDEKFPPIYTRPRYL  
168 FDLLNK---FPSYTDGKGE--IIPALG---RGD---KLKSYVF---NDYW---EDI---GT---IGAFFESNLAL--TQOPTPPFSFYDEKFPPIYTRPRYL  
169 FRLLAE---NPGATDFGKE--IIPKALD---DGF---KLRSYLF---DDYW---EDI---GT---IRAFYEANLAL--TTQPRPPFSFYDKRFPIYTRHRYL  
170 FDLLHQ---NPKHKDFGKE--VIPEALQ---RGD---RLKSYVF---DDYW---EDI---GT---IGAFYEANLAL--TQOPTPPFSFYDEFFPIYTRPRYL  
171 IDLLDQ---NKEQTDGKGE--IIPSAAK---D-Y---NLQAYLF---KGYW---EDI---GT---IEAFYENLAL--TQQPMPPFSFYDEKAPIYTRARYL  
172 FDLLNK---FPSYTDGKGD--IIPALN---RGD---SLKSYVF---DDYW---EDI---GT---IGAFFESNLAL--TEQPKPPFSFYDEKFPPIYTRPRYL  
173 FDLLNS---NPTATDFGKE--IIPASLA---RGD---QLRSYLF---DDYW---EDI---GT---IGAFYEANLAL--TQQPNPPFSFYDEKFPPIYTRPRYL  
174 GKLLRA---NLEQTDGKGE--IIPASAA---D-H---NVQAYLF---KGYW---EDI---GT---IEAFYENLAL--TQQPYPAFSFYDEKAPIYTRARYL  
175 IKLLKE---SLERTDFGKE--IIPDAAQ---D-H---NVQAYLF---DDYW---EDI---GT---IEAFYANLAL--TQQPMPPFSFYDEKAPIYTRARYL  
176 KEVLEA---NSEHTDFGNE--VIPASMP---K-Y---NIQAYLF---NDYW---QDI---GT---IEAFYANLAL--TRQPSPSFSFYQEDAPIYTRARYL  
177 IKLLKE---ASERTDFGKE--IIPDAAK---D-Y---NVQAYLF---NDYW---EDI---GT---IEAFYANLAL--TQQPRPPFSFYDEKAPIYTRARYL  
178 NDLLKN---NPEQTDGKGE--IIPGAAK---D-Y---NLQAYLF---KGYW---EDI---GT---IEAFYEANLAL--NRQPRPSFSFYNEKAPIYTRARNL  
179 IDLLKQ---QPDCTDFGKE--IIPNAIK---D-L---NIQAYLF---NDYW---EDI---GT---IEAFYANLAL--TQQPMPPFSFYDEKAPIYTRARYL  
180 FDLLEA---NPGHKDFGKE--VIPEALS---RGD---VLKSYVF---DDYW---EDI---GT---IGAFYEANLAL--TQOPTPPFSFYDEAFPIYTRPRYL  
181 TQLLEN---NPEQTDGKGE--VIPNAAV---Q-Y---NLQAYLF---DGYW---EDI---GT---VQAFYEANLAL--NHQPNPAFSFYNEQSPIYTHARYL  
182 IKLLKE---SPNQTDGKGE--IIPASAK---D-H---NVQAYLF---DDYW---EDI---GT---IEAFYANLAL--TQQPQPPFSFYDENAPIYTRPRYL  
183 MKLLKE---SPEQTDGKGE--IIPASAK---D-Y---NVQAYLF---DGYW---EDI---GT---IEAFYANLAL--TQQPMPPFSFYDEKAPIYTRARYL  
184 IKLLRE---SLEKTDGKGE--IIPDAAK---D-H---NVQAYLF---DGYW---EDI---GT---IEAFYANLAL--TQQPVPPFSFYDEEAPIYTRARYL  
185 IKLLRE---SLEKTDGKGE--IIPDAAK---D-H---NVQAYLF---DGYW---EDI---GT---IEAFYANLAL--TQQPVPPFSFYDEEAPIYTRARYL  
186 FKLLKD---APDQTDGKGE--VIPGAAK---D-H---NVQAYLF---NDYW---EDI---GT---IEAFFEANLAL--TQQPQPAFSFYDENAPIYTRARYL  
187 TDLLRN---NPEQTDGKGE--IIPGSAK---D-Y---NLQAYLF---KGYW---EDI---GT---IEAFYEANLAL--NRQPMPPFSFYDEKAPIYTRARNL  
188 FDLLEK---HPGHKDFGKE--IIPALAL---RGD---KLQSYVF---DDYW---EDI---GT---IGAFYEANLAL--TQOPTPPFSFYDEKFPPIYTRPRYL  
189 ISFLNS---EYPKDNDFGGE--IIPKAAA---DGY---HVQAYLF---KDYW---EDI---GT---IKSFFEANLAL--AKHP-PQEFYDARAPIYTSRFL  
190 DELLTE---KFPDCHDFGGE--IIPKANE---LGR---HVQAFYF---KGYW---EDI---GT---IEAFYANLAL--NDPDAPKFSFYSSESPPIYTSRFL  
191 LNFLNA---EYPKDNDFGGE--IIPKAAA---DGY---HVQAYLF---NDYW---EDI---GT---IKSFFEANLAL--AKNP-PQEFYDARAPIYTSRFL  
192 EKLLME---DFPTCHDFGGE--IIPNAKD---LGM---HVQAFYF---DGYW---EDI---GT---IKAFFDANLAL--NDPEKAKFSFYQTGAPIYTSRFL  
193 LQLLND---SYAKANDFGGE--IIPSAAK---D-H---NVVAYPF---YGYW---EDI---GT---IKSFFEANLAL--CRHP-ATPEFYDQSPIYTSRFL  
194 RELLEL---RMPGANDFGNE--VIPGAKD---AGF---KVQAFYF---DGYW---EDI---GT---VEAFYANLAL--TDPEKAQFSFYDKDAPYITMSRFL  
195 VKFLEK---DYPEDNDFGGE--IIPRAAA---DGA---RVQAYLF---NDYW---EDI---GT---MKSFFEANLAL--AKDP-PNFEFYNAEAPIYTSRFL  
196 RECLLE---NFKEADDFGGE--IIPMAAQ---MGL---KVQAFYF---EGYW---EDI---GT---VDAFFHANLAL--NDPN-PAFNFHEMNAPIYTSRFL  
197 RELLEL---RMPGANDFGNE--VIPGAKD---AGY---KVQAYYF---KGYW---EDI---GT---VEAFYANLAL--ADPSKAQFSFYDKDAPYITMSRFL  
198 CKLLNE---TYAKANDFGGE--IIPAAK---N-H---NVVAYPF---YGYW---EDI---GT---IKSFFEANLAL--CRHP-ATPEFYDQSPIYTSRFL  
199 VKFLDD---DYPEDNDFGGE--IIPKASA---DGA---RVQAYLF---NDYW---EDI---GT---MKSFFEANLAL--AKDP-PNFEFYNAEAPIYTSRFL  
200 EQVLQD---DFPEANDFGGE--IIPMAAQ---KGM---KVVAFYF---DGYW---EDI---GT---VDAFFHANLAL--NDPN-PKFSFYDRNAPIYTSRFL  
201 LKLLRW---RYPTANDFGSE--IIPASAK---E-Y---NVQAYLF---NDYW---EDI---GT---IKSFEANLAL--TCQP-PKFRFYDAKPIYTSRFL  
202 SRRLLD---EFPNCDNFGE--VIPGATQ---LGM---KVQAYYF---DGYW---EDI---GT---IEAFYANLAL--TKFPVNFPSFYDRSAPIYTSRFL  
203 SRRLLD---EFPNCDNFGE--VIPGATQ---LGM---KVQAYYF---DGYW---EDI---GT---IEAFYANLAL--TKFPVNFPSFYDRSAPIYTSRFL  
204 SRRLLD---EFPNCDNFGE--VIPGATQ---LGM---KVQAYYF---DGYW---EDI---GT---IEAFYANLAL--TKFPVNFPSFYDRSAPIYTSRFL  
206 LKLLRW---RYPTSNDFGSE--IIPAAAS---E-Y---NVQAYLF---NDYW---EDI---GT---IKSFFDANLAL--TAQP-PKFSFYDASNPIFTSPRFL  
207 LKLLRW---RYPTSNDFGSE--IIPAAAN---E-Y---NVQAYLF---NDYW---EDI---GT---IKSFFDANLAL--TAQP-PKFSFYDASNPIFTSPRFL  
208 LKLLRW---RYPTANDFGSE--IIPASAK---E-Y---NVQAYLF---NDYW---EDI---GT---IKSFEANLAL--TCQP-PKFRFYDAKPIYTSRFL  
209 LKLLRW---RYPTANDFGSE--IIPASAK---E-Y---NVQAYLF---NDYW---EDI---GT---IKSFEANLAL--TCQP-PKFRFYDAKPIYTSRFL

410 420 430 440 450 460 470 480 490 500

1 PP--SKMLDADVTDVIG--EG--CVIK--N---CKIHHSVVG--LR--SCI--SEG--AIIEDSLLM--GADYYET--DADRLLAAK--GSVPI--GI  
2 PP--SKMLDADVTDVIG--EG--CVIK--N---CKIHHSVVG--LR--SCI--SEG--AIIEDSLLM--GADYYET--DADRLLAAK--GSVPI--GI  
3 PP--SKMLDADVTDVIG--EG--CVIK--N---CKIHHSVVG--LR--SCI--SEG--AIIEDSLLM--GADYYET--DADRLLAAK--GSVPI--GI  
4 PP--SKMLDADVTDVIG--EG--CVIK--N---CKIHHSVVG--LR--SCI--SEG--AIIEDSLLM--GADYYET--DADRLLAAK--GSVPI--GI  
5 PP--SKMLDADVTDVIG--EG--CVIK--N---CKIHHSVVG--LR--SCI--SEG--AIIEDSLLM--GADYYET--ATEKSLLSAK--GSVPI--GI  
6 PP--SKMLDADVTDVIG--EG--CVIK--N---CKIHHSVVG--LR--SCI--SEG--AIIEDSLLM--GADYYET--ASEKSLLSAK--GSVPI--GI  
7 PP--SKMLDADITDVIG--EG--CVIK--N---CKIFHSVVG--LR--SCI--SEG--AIIEDTLLM--GADYYET--EADKSFLLAK--GSVPI--GI  
8 PP--SKMLDADITDVIG--EG--CVIK--N---CKIHHSVVG--LR--SCI--SEG--AIIEDTLLM--GADYYET--DADRFLAAK--GSVPI--GI  
9 PP--SKMLDADVTDVIG--EG--CVIK--N---CKIHHSVVG--LR--SCI--SEG--AIIEDTLLM--GADYYET--EADKFLAAK--GSVPI--GI  
10 PP--SKMLDADVTDVIG--EG--CVIK--N---CKIHHSVVG--LR--SCI--SEG--AIIEDTLLM--GADYYET--EADKFLAAK--GSVPI--GI  
11 PP--SKMLDADVTDVIG--EG--CVIK--N---CKIHHSVIG--LR--SCI--SEG--AIIEDTLLM--GADYYET--DADRFLAAK--GSVPI--GI  
12 PP--SKMLDADVTDVIG--EG--CVIK--N---CKIHHSVVG--LR--SCI--SEG--AIIEDTLLM--GADYYET--DADRFLAAK--GSVPI--GI  
13 PP--SKMLDADVTDVIG--EG--CVIK--N---CKIHHSVVG--LR--SCI--SEG--AIIEDTLLM--GADYYET--DADRFLMAK--GSVPI--GI  
14 PP--SKMLDADVTDVIG--EG--CVIK--N---CKIHHSVIG--LR--SCI--SEG--AIIEDTLLM--GADYYET--DADRLLAAK--GRVPI--GI  
15 PP--SKMLDADITDVIG--EG--CVIK--N---CKIHHSVIG--LR--SCI--SEG--AIIEDTLLM--GADYYET--DADRFLAAK--GSVPI--GI  
16 PP--SKMLDADITDVIG--EG--CVIK--N---CKIHHSVVG--LR--SCI--SEG--AIIEDTLLM--GADYYET--DADRFLAAK--GGVPI--GI  
17 PP--SKMLDADITDVIG--EG--CVIK--N---CKIFHSVVG--LR--SCI--SEG--AIIEDTLLM--GADYYET--EADKFLAAK--GSVPI--GI  
18 PP--SKMLDADITDVIG--EG--CVIK--N---CKIHHSVVG--LR--SCI--SEG--AIIEDTLLM--GADYYET--DADRFLAAK--GSVPI--GI  
19 PP--SKMLDADITDVIG--EG--CVIK--N---CKIFHSVIG--LR--SCI--SEG--AIIEDTLLM--GADYYET--DADRFLAAK--GSVPI--GI  
20 PP--SKMLDADITDVIG--EG--CVIK--N---CKIHHSVVG--IR--TCI--SEG--AIIEDTLLM--GADYYET--DADRLLAAK--GSVPI--GI  
21 PP--SKMLDADITDVIG--EG--CVIK--N---CKIHHSVVG--IR--TCI--SEG--AIIEDTLLM--GADYYET--DADRLLAAK--GSVPI--GI  
22 PP--SKMLDADVTDVIG--EG--CVIK--N---CKIHHSVVG--LR--SCI--SEG--AIIEDTLLM--GADYYET--DADRFLAAK--GSVPI--GI  
23 PP--SKMLDADVTDVIG--EG--CVIK--N---CKIHHSVVG--LR--SCI--SEG--AIIEDTLLM--GADYYET--DADRFLAAK--GSVPI--GI  
24 PP--SKMLDADITDVIG--EG--CVIK--N---CKIHHSVIG--LR--SCI--SEG--AVIEDTLLM--GADYYET--DADRLLMAK--GSVPI--GI  
25 PP--SKMLDADVTDVIG--EG--CVIK--N---CKIHHSVVG--LR--SCI--SEG--AIIEDTLLM--GADYYET--DADRLLAAK--GSVPI--GI  
26 PP--SKMLDADVTDVIG--EG--CVIK--N---CKIHHSVVG--VR--SCI--SEG--AIIEDSLLM--GADYYET--DADRLLAAK--GSIPI--GI  
27 PP--SKMLNADVTDVIG--EG--CVIK--N---CKIHHSVIG--LR--SCI--SEG--AIIEDTLLM--GADYYET--DSDRRLLAAK--GGIPI--GI  
28 PP--SKMLDADVTDVIG--EG--CVIK--N---CKIHHSVVG--LR--SCI--SEG--AIIEDTLLM--GADYYET--DADRFLAAK--GGVPI--GI  
29 PP--SKMLDADVTDVIG--EG--CVIK--N---CKIHHSVVG--LR--SCI--SEG--AIIEDTLLM--GADYYET--DADRFLAAK--GSVPI--GI  
30 PP--SKMLDADITDVIG--EG--CVIK--N---CKIHHSVVG--LR--SCI--SEG--AIIEDTLLM--GADYYET--DADRFLAAK--GGVPI--GI  
31 PP--SKMLDADITDVIG--EG--CVIK--N---CKIFHSVVG--LR--SCI--SEG--AIIEDTLLM--GADYYET--EADKFLAAK--GSVPI--GI  
32 PP--SKVLDADVTDVIG--EG--CVIK--H---CTINHHSVVG--LR--SCI--SEG--AVIEDSLLM--GADYYET--ENDKNVLSSET--GGIPI--GI

33 PP--SKVLDADVTD SVIG--EG--CVIK--N---CKINHSVVG--LR--SCI--SEG--AIIEDSLLM--GADYYET--EADKLLAEK--GGIPI--GI  
34 PP--SKVLDADVTD SVIG--EG--CVIK--N---CKINHSVVG--LR--SCI--SEG--AIIEDSLLM--GADYYET--EADKLLAEK--GGIPI--GI  
35 PP--SKVLDADVTD SVIG--EG--CVIK--N---CKINHSVVG--LR--SCI--SEG--AIIEDSLLM--GADYYET--EADKLLAEK--GGIPI--GI  
36 PP--SKVLDADVTD SVIG--EG--CVIK--N---CKIHHSVVG--LR--SCI--SEG--AIIEDTLLM--GADYYET--EADKLLAEN--GGIPI--GI  
37 PP--SKVLDADVTD SVIG--EG--CVIK--N---CKIHHSVVG--LR--SCI--SEG--AIIEDSLLM--GADYYET--EADKLLGK--GGIPI--GI  
38 PP--SKVLDADVTD SVIG--EG--CVIK--H---CTINHSVVG--LR--SCI--SEG--AVIEDSLLM--GADYYET--ETDKKVLSE--GGIPI--GI  
39 PP--SKVLDADVTD SVIG--EG--CVIK--N---CKIHHSVVG--LR--SCI--SEG--AIIEDSLLM--GADYYET--EADKLLGK--GGIPI--GI  
41 PP--SKVLDADVTD SVIG--EG--CVIK--N---CKIHHSVVG--LR--SCI--SEG--AIIEDTLLM--GADYYET--EADKQLLAEK--GGIPI--GI  
42 PP--SKVLDADVTD SVIG--EG--CVIK--N---CKIHHSVVG--LR--SCI--SEG--AIIEDTLLM--GADYYET--EADKQLLAEK--GGIPI--GI  
43 PP--SKVLDADVTD SVIG--EG--CVIK--H---CTINHSVVG--LR--SCI--SEG--AVIEDSLLM--GADYYET--ETDKKVLSE--GGIPI--GI  
44 PP--SRVLDADVTD SVIG--EG--CVIN--H---CKINHSVVG--LR--SCI--SEG--AVIEDSLLM--GADYYET--ENDKKVLSE--GGIPI--GI  
45 PP--SKVLDADVTD SVIG--EG--CVIK--N---CKIHHSVVG--LR--SCI--SEG--AIIEDTLLM--GADYYET--EADKLLAEK--GGIPI--GI  
46 PP--SKVLDADVTD SVIG--EG--CVIK--N---CKIHHSVVG--LR--SCI--SEG--AIIEDTLLM--GADYYET--EADKLLAEK--GGIPI--GI  
47 PP--SKVLNADVTD SVIG--EG--CVIN--H---CTINHSVVG--LR--SCI--SEG--AVIEDSLLM--GADYYET--ENDKKVLSE--GGIPI--GI  
48 PP--SKVLDADVTD SVIG--EG--CVIK--N---CKIHHSVVG--LR--SCI--SEG--AIIEDTLLM--GADYYET--EADKLLAEK--GGIPI--GI  
49 PP--TKIDNCKIKDAIIS--HG--CFLR--D---CSVHSVVG--ER--SRL--DCG--VELKDTFMM--GADYYQT--ESEIASLLAE--GKVP--GI  
50 PP--TKVDKSRIVDAIIS--HG--CFLR--E---CNIQHSVVG--VR--SRL--DYG--VEFKDTMM--GADYYQT--ECEIASLLAE--GKVP--GV  
51 PP--SAIDNSKIVDSIIS--HG--IFLT--N---CFVHSVVG--IR--SRI--GTN--VHLKDTVML--GADYYET--DAEIASQLAE--GKVP--GI  
52 PP--SKIDNSKILDSIIS--HG--SFLT--N---CLIEHSVVG--IR--SRV--GSN--VOLKDTVML--GADYYET--EAEVAALLAE--GNVPI--GI  
53 PP--TKVDKRILDSIIS--HG--CFLR--E---CSVQHSVVG--IR--SRL--ESG--VELQDTMM--GADFYQT--EAEIASLLAE--GKVP--GV  
54 PP--TKTEKCRIVNSVIS--HG--CFLG--E---CSIQHSVVG--ER--SRL--DYG--VELQDTML--GADSYQT--ESEIASLLAE--GNVPI--GI  
55 PP--TKAEKCRMVDSIIS--HG--CFLR--E---CSVQHSVVG--ER--SRL--DYG--VELQDTML--GADYYQT--ESEIASLLAE--GKVP--GI  
56 PP--TKIDNCKIKDAIIS--HG--CFLR--D---CTVHSVVG--ER--SRL--DCG--VELKDTFMM--GADYYQT--ESEIASLLAE--GKVP--GI  
57 PP--TKVDKSRIVDAIIS--HG--GFLR--E---CNIQHSVVG--VR--SRL--DYG--VEFKDTMM--GADYYQT--ESEIASLLAE--GKVP--GV  
58 PP--SAIDNSKIVDSIIS--HG--SFLT--N---CFVHSVVG--IR--SRI--GTN--VHLKDTVML--GADYYET--DAEIASQLAE--GKVP--GI  
59 PP--TKIDNCKIKDAIIS--HG--CFLR--D---CTVHSVVG--ER--SRL--DCG--VELKDTFMM--GADYYQT--ESEIASLLAE--GKVP--GI  
60 PP--TKVDKSRIVDAIIS--HG--CFLR--E---CNIQHSVVG--VR--SRL--DYG--VEFKDTMM--GADYYQT--ESEIASLLAE--GKVP--GV  
61 PP--SKIDNSKILDSIIS--HG--SFLT--N---CLIEHSVVG--IR--SRV--GSN--VOLKDTVML--GADYYET--EAEVASLLAE--GKVP--GI  
62 PP--TKVDKRILDSIIS--HG--CFLR--E---CSVQHSVVG--IR--SRI--ESG--VELQDTMM--GADFYQT--EAEIASLLAE--GKVP--GV  
63 PP--TKTEKCRIVNSVIS--HG--CFLG--E---CSIQHSVVG--ER--SRL--DYG--VELQDTML--GADSYQT--ESEIASLLAE--GNVPI--GI  
64 PP--TKAEKCRMVDSIIS--HG--CFLR--E---CSIQHSVVG--ER--SRL--DYG--VELQDTML--GADYYQT--ESEIASLLAE--GKVP--GI  
66 PP--TKMEKCEVNSIIS--DG--CFLK--E---CTVHSVVG--IR--SRL--DSG--VOLKDTMIM--GADYYQT--EAEIASLLAE--GNVPI--GI  
67 PP--SKIDNSKIVDSIIS--HG--SFLT--N---SFIHSVVG--IR--SRI--NSN--VHLKDTVML--GADYYET--DAEVVALLAE--GRVPI--GI  
68 PP--TKAIKCKIMDAIIS--HG--CFLS--E---SRVHSVVG--VR--SRL--ESG--SELQDTMM--GADYYQT--DSEIATLLEK--GKVP--GV  
69 PP--TKAIKCKIVDAIIS--HG--CFLS--E---CRVHSVVG--VR--SRL--ESG--SELQDTMM--GADYYQT--DSEIATLLEK--GKVP--GV  
70 PP--TKIDKCRIVDAIIS--HG--CFLR--E---CTVQHSVVG--ER--SRL--DYG--VELQDTVMM--GADYYQT--ESEIASLLAE--GKVP--GI  
71 PP--TKIDKCRIVDAIIS--HG--CFLR--E---CTVQHSVVG--ER--SRL--DYG--VELQDTVMM--GADYYQT--ESEIASLLAE--GKVP--GI  
72 PP--SKIDNSKIVDSIIS--HG--SFLT--N---SFIHSVVG--IR--SRI--NSN--VHLKDTVML--GADYYET--EAEIASLLAE--GRVPI--GI  
73 PP--TKVEKCKIVDAIIS--HG--CFLR--E---CSVQHSVVG--VR--SRL--ESG--VELQDTMM--GADYYQT--EYEIASLVAE--GKVP--GV  
74 PP--TKIDKCRIVDAIIS--HG--CFLR--E---CTVQHSVVG--ER--SRL--DYG--VELQDTVMM--GADYYQT--ESEIASLLAE--GKVP--GI  
75 PP--TKVEKCKIVDAIIS--HG--CFLR--E---CSIQHSVVG--VR--SRL--ESG--VELQDTMM--GADYYQT--EYEIASLVAE--GKVP--GV  
76 PP--TKIDKCRIVDAIIS--HG--CFLR--E---CTVQHSVVG--ER--SRL--DYG--VELQDTVMM--GADYYQT--ESEIASLLAE--GKVP--GI  
77 PP--TKMEKCEVNSIIS--DG--CFLK--E---CTVHSVVG--IR--SRL--DSG--VOLKDTMIM--GADYYQT--EAEIASLLAE--GNVPI--GI  
80 PP--TKIDKCRIVDAIIS--HG--CFLR--E---CSVQHSVVG--ER--SRL--DYG--VELQDTVMM--GADYYQT--ESEIASLLAE--GKVP--GI  
81 PP--TKIEKCRVDSIIS--HG--CFLR--E---CSVQHSVVG--VR--SRL--EYG--VELKDTMM--GADYYQT--EAEIASLLAE--GKVP--GV  
82 PP--TKFDKCRIVDAIIS--HG--CFLR--E---CTVQHSVVG--ER--SRL--DYG--VELKDTVML--GADCYQT--EVEIASLLAE--GRVPI--GV  
84 PP--SKIDNSKIVDSIIS--HG--SFLT--N---SFIHSVVG--IR--SRI--NSN--VHLKDTVML--GADFYET--EAEIASLVAE--GKVP--GI  
87 PP--SKIEKCRIVDSIIS--HG--SFLT--N---SFIHSVVG--IR--SRI--NSN--VHLKDTVML--GADFYET--DDEVAALLAE--GRVPI--GI  
88 PP--TKIEKCRVDSIIS--HG--CFLR--E---CSVQHSVVG--VR--SRL--EYG--VELKDTMM--GADYYQT--EAEIASLLAE--GKVP--GV  
89 PP--TKIDKCRIVDAIIS--HG--CFLR--E---CTVQHSVVG--ER--SRL--DYG--VELKDTVML--GADYYQT--EAEIASLLAE--GKVP--GV  
90 PP--TKVDQCRIVDAIIS--HG--CFLQ--E---CSIQHSVVG--VR--SRL--ESA--VELMDTMM--GADYYQT--EAEIASLLAE--GKVP--GV  
91 PP--TKVEEKRILDAIIS--HG--CFLR--E---CSVQHSVVG--VR--SRL--EYG--VELKDTMM--GADYYQT--ESEIASLLAE--GKVP--GV  
92 PP--TKIEKCRMVDSIIS--HG--CFLR--E---CSVQHSVVG--IR--SRL--DYG--VEMKDTMM--GADYYQT--EEEIAAFLAE--GKVP--GV  
94 PP--SKIDNSKIVDSIIS--HG--SFLT--N---SFIHSVVG--IR--SRV--NSN--VHLKDTVML--GADYYET--DSEIASLLAE--GRVPI--GI  
95 PP--TKIEQCVVDAIIS--HG--CFLR--E---CSVQHSVVG--ER--SRL--DYG--VELKDTML--GADFYQT--ESEIASLLAE--GNVPI--GI  
96 PP--TKVDRCRIVDAIIS--HG--CFLR--E---CSVQHSVVG--VR--SRL--ESG--VELQDTMM--GADYYQT--ESEIASLLAE--GKVP--GV  
97 PP--TKIDKCRIVDAIIS--HG--CFLR--E---CTVQHSVVG--ER--SRL--DYG--VELKDTVML--GADHYQT--EAEIASLLAE--GKVP--GV  
98 PP--TKVDKCRIVDAIIS--HG--CFLR--E---CSVQHSVVG--VR--SRL--ESG--VELQDTMM--GADYYQT--ESEIASLVAE--GKVP--GV  
99 PP--SMVNSKITDSIIS--HG--CFLD--N---CRIEHSVVG--VR--SRI--GSN--VHLKDTVML--GADYYET--AVERGELLAE--GKVP--GI  
100 PP--TQLDKCKMKYAFIS--DG--CLLR--E---CNIHSVVG--VC--SRV--SSG--CELKDSVMM--GADTYET--EEEASKLLLA--GKVP--GV  
101 PP--TKSDKCRIKDAIIS--HG--CFLR--E---CAIEHSVVG--VP--SRL--NSG--CELKNTMM--GADLYET--EDEISRLLE--GKVP--GV  
102 PP--TKVENCKVLNSIIS--HG--CFLT--E---CSVHSVVG--IR--SRL--EPG--VOLKDTMM--GADYYQT--EAERLSELSV--GKVP--GV  
103 PP--TKSDKCRIKDAIIS--HG--CFLR--E---CTIEHSVVG--VR--SRL--NSG--CELKNAMMM--GADLYET--EDEISRLLE--GKVP--GV  
104 PP--TKVEDCKVLNSIIS--HG--CFLT--E---CSVHSVVG--IR--SRL--QPG--VOLKDTMM--GADYYQT--EAERFSELSV--GKVP--GV  
105 PP--SMISSKITDSIIS--HG--CFLD--N---CRVHSVVG--VR--SRV--GSN--VHLKDTVML--GADFYET--DVERSDQLAE--GKVP--GI  
106 PP--SMINNSKITDSIIS--HG--CFLD--S---CRIEHSVVG--IR--SRI--GSN--VHLKDTVML--GADFYET--DLERGELLAE--GKVP--GI  
107 PP--TKSDKCRIKDAIIS--HG--CFLR--E---CTIEHSVVG--VR--SRL--NSA--CELKNTMM--GADLYET--EDEISRLLE--GKVP--GV  
108 PP--TKVENCKVLNSIIS--HG--CFLT--E---CSVDRSVVG--VR--SRL--EPG--VOLKDTMM--GADYYQT--EAERFSELSV--GKVP--GV  
109 PP--ARLEKCKIKDAIIS--DG--CSFS--E---CTIEHSVVG--IS--SRV--SIG--CELKDTMM--GADQYET--EETSLLLE--GKVP--GI  
110 PP--TKSDKCRIKDAIIS--HG--CFLR--E---CAIEHSVVG--VR--SRL--NSG--CELKNTMM--GADLYET--EDEISRLLE--GKVP--GV  
111 PP--TQLDKCKIKDAIIS--DG--CLLR--E---CAIEHSVVG--VC--SRV--SYG--CELKCVMM--GADLYET--EEEASKLLLA--GKVP--GI  
112 PP--SMVNSKITDSIIS--HG--CFLD--N---CRIEHSVVG--VR--SRI--GSN--VHLKDTVML--GADYYET--DAERRELLAE--GNVPI--GI  
113 PP--TKSDKCRIKDAIIS--HG--CFLR--E---CKIEHSVVG--VR--SRL--NSG--SELKNAMMM--GADSYET--EDEISRLMSE--GKVP--GV  
114 PP--SMISSKITDSIIS--HG--CFLD--K---CRVHSVVG--IR--SRI--GSN--VHLKDTVML--GADFYET--DAERGDQLAE--GKVP--GI  
115 PP--TKSDKCRIKDAIIS--HG--CFLR--E---CKIEHSVVG--VR--SRL--NSG--SELKNAMMM--GADSYET--EDEISRLMSE--GKVP--GV  
116 PP--TAINNSKIVDSIIS--HG--SLLS--N---CLIEHSVVG--IR--SRI--NDN--VHLKDTVML--GADLYET--DAEIAALLAE--GRVPI--GI  
117 PP--TKSDKCRIKDAIIS--HG--CFLR--E---CKIEHSVVG--VR--SRL--NSG--SELKNAMMM--GADSYET--EDEISRLMSE--GKVP--GV

118 PP--SMISGSKITDSIIS--HG--CFLD--K--CRVEHSVVG--IR--SRI--GSN--VHLKDTVML--GADFYET--DMERGDLAE--GKVPFI--GI  
119 PP--TKSDKCRIKEAIIIS--HG--CFLR--E--CKIEHSIIG--VR--SRL--NSG--SELKNAMMM--GADSYET--EDEISRLMSE--GKVPFI--GV  
120 PP--TKSDKCRIKEAIIIL--HG--CFLR--E--CKIEHTAF-----SRL--NSG--SELKNAMMM--GADSYET--EDEMSRLMSE--GKVPFI--GV  
121 PP--SKLVDQAQITESIIG--EG--TILK--S--CSIHHCVLG--VR--SRV--END--VVLQDSLML--GADFFES--STERSVLRER--GGIPV--GV  
122 PP--SKMLDCQITESIIA--EG--CILK--E--CRIDHSVLG--LR--SRV--ESG--SLVEDTMLM--GSDFYQP--FAERQYGLEK--GSVPI--GI  
123 PP--SKLLSCHVTEESIIG--EG--CILK--D--CRIQHSVLG--VR--SRI--EAG--CVIEESLLM--GADFYQP--SVERQCNLEK--GGIPV--GI  
124 PP--TKVLNSNITESMIS--EG--CMIK--D--CRIHNSVLG--IR--SRI--ETD--CVVEDSLLM--GADYYES--LDDRQSLLDQ--GKIPI--GI  
125 PP--TKQKQCQVITESMIS--EG--CILK--E--CYIENSVIG--IR--SRI--DSG--CTIKNVLLM--GADYYQS--DFENEGDCSL--ENIPI--GI  
126 PP--SKMLDAQVTSIIG--EG--SMLK--A--CSIHHCVLG--VR--TRV--EDE--AVLQDTLVM--GSDFFES--SEERAVLRER--GGIPL--GV  
127 PP--SKLLDSQVTSIIG--EG--SILK--A--CSIHHCVLG--VR--SRV--EED--AVLQDTLVM--GNDFFES--SAERNALRHR--GGIPV--GV  
128 PP--SKLLDAQVTSIIG--EG--SLLQ--D--CSIHHCVLG--VR--SRI--ESE--VVLQDTLVM--GADFFES--SEERAVLRER--GGIPV--GV  
129 PP--SKILDCAQITESIIS--EG--SILK--Q--CRIHNSVLG--LR--SRI--EAG--CVIEDTLVM--GSDYYEP--FAERQSNIQQ--GKIPI--GI  
130 PP--SKVGSQIIDSIIIG--EG--SIK--S--CSVNSVVLG--IR--SRI--ENS--VVVQDSLVM--GSDFYES--TQEREELRRN--GGIPL--GV  
131 PP--SKLVDQIVNSIIG--EG--SILK--S--CSIHHCVLG--VR--SRV--ETD--VVLQDTLVM--GADFFES--NDERALRQK--GGIPV--GV  
132 PP--SKLVDQITDSIIG--EG--SILK--S--CSIHHSVLG--VR--SRV--EDD--VVLQDSLML--GSDFFES--SSERAVLKER--GGIPL--GV  
133 PP--SKLIDCAQIESIIT--EG--CIK--Q--ARIFHSVLG--LR--SRI--ESG--VRIEDSLLM--GADFYET--PIQREESLRR--GLPPV--GI  
134 PP--SKLVDQAQITDSIVC--EG--TILK--S--CSILHCVLG--VR--SRI--ESD--SVIEDTLVM--GSDFFES--LEERIELRKG--GGTPL--GV  
135 PP--SKLVDQAQITDSIVG--EG--SILK--S--CSIHHCVLG--VR--SRI--ESD--VVLQDSLVM--GSDFYES--SEERLALRKG--GGIPL--GV  
136 PP--SKILSSTITESIIS--EG--CILK--E--CQVHRSVLG--VR--SRV--ESG--CVIDHSLLM--GADYYQD--SAQRSQRLRQ--HKIPI--GI  
137 PP--TKALNCTITESMVS--EG--CILK--D--CRIHNSILG--IR--TRI--EAN--CTIEDTMLM--GADYYES--PSLRESKAQE--GKIPI--GI  
138 PP--TKLLDCQITESIIG--EG--CILK--N--CRIQHSVLG--VR--SRI--ESG--CVIEESLLM--GADFYQA--SVERQCSLIE--NDIPV--GI  
139 PP--TKLVDQAQITESIIG--EG--SILK--S--CSIHHCVLG--VR--SRV--ESD--VVLQDSLVM--GSDFYES--SEERLTLRQ--GGIPL--GV  
140 PP--NKILDSQIVNSMIA--DG--CIK--N--AQIRNSIIG--IR--SRL--EAN--TIIENTLVM--GADYYES--AEERQARLEE--GIPV--GI  
141 PP--NKILDSQIVNSMIA--DG--CIK--N--AQIRNSIIG--IR--SRL--EAN--TIVENTLVM--GADYYES--AEERQAKLEA--GIPV--GI  
142 PP--TKLVDQAQITESIIG--EG--SILK--S--CSIHHCVLG--VR--SRV--ESD--VVLQDSLVM--GSDFYES--SEERTLLRQ--GGIPL--GV  
143 PP--SKLVDQAQITNSIVG--EG--SILK--S--CSIHHCVLG--VR--SRI--ETD--VVLQDTLVM--GADFFES--SDERAVLRER--GGIPV--GV  
144 PP--TKLLDCHVTEESIIG--EG--CILK--N--CRIQHSVLG--VR--SRI--ETG--CMIEESLLM--GADFYQA--SVERQCSIDK--GDIPV--GI  
145 PP--SKLVDQAQITDSIVG--EG--SILK--A--CSIHHCVLG--VR--SRI--ESD--VVLQDTLVM--GSDFYES--GEERALRSG--GGIPL--GV  
146 PP--SKLVDQAQITDSIVC--EG--TILK--S--CSILHCVLG--VR--SRI--ESD--SVLEDTLVM--GADFFES--PEERFELRKG--GGTPL--GV  
147 PP--SKIVDTQITDSIVS--EG--SILK--S--CSIHHCVLG--VR--SRI--ESD--VVLNETLVM--GSDFYES--VEERIALRNG--GGIPL--GV  
148 PP--SKLVDQAQITDSIVC--EG--TILK--S--CSILHCVLG--VR--SRI--ESD--SVLEDTLVM--GADFFES--PEERIELRKG--GGTPL--GV  
149 PP--SKLVDQAQITDSIVC--EG--TILK--S--CSILHCVLG--VR--SRI--ESD--SVIEDALVM--GADFFES--QEEVERLKR--GGTPL--GV  
150 PP--SKFVDSQITDSIIS--EG--SIK--A--CSIHHSVLG--VR--SRV--ENN--VVLQDSLML--GADFFES--QGERETLRR--GGIPV--GV  
151 PP--TKVLNCTITESMIS--EG--CILK--D--CRIHNSVLG--IR--SRV--ESD--CTIEDSMLM--GADYYES--STKRKAVLEA--GKVPQ--GI  
152 PP--SKLVDQAQITDSIVC--EG--TILK--S--CSILHCVLG--VR--SRI--ESD--SILEDTLVM--GADFFES--PEERIELRKG--GGTPL--GV  
153 PP--TKMLNSTVITESMIG--EG--CMIK--Q--CRIHNSVLG--IR--SRI--ESD--CTIEDTLVM--GNDFFES--SSERTLKR--GETAA--GI  
154 PP--TKALNCTITESMVS--EG--CILK--D--CRIHNSILG--IR--TRI--EAN--CTIEDTMLM--GADYYES--PSLRESKAQE--GKIPI--GI  
155 PP--TKLLDCQVTSIIG--EG--CILK--Q--CTVQNSVLG--IR--SRI--EAD--CVIQDALLM--GADFYET--SELRHQNRAN--GKVP--GI  
156 PP--SKLLDCQVTSIIG--EG--CILK--N--CQIQHSVLG--VR--SRI--ESG--CVIDNALLM--GADFYQP--FAERHKKIKN--NSVPL--GI  
157 PP--TKLLDCQVTSIIG--EG--CILK--Q--CTVQNSVLG--IR--SRI--EAD--CVIQDALLM--GADFYET--SELRHQNRAN--GKVP--GI  
158 PP--SKLVDQAQITNSIVG--EG--SILK--S--CSIHHCVLG--VR--SRI--ESD--CVLQDTLVM--GADFFES--PDERAVLKER--GGIPL--GV  
159 PP--SKLVDQAQIVNSIIG--EG--SILK--S--CSIHHCVLG--VR--SRV--ETD--VVLQDTLVM--GADFFES--NEERETIRQ--GGIPV--GV  
160 PP--SKILDRCVITESIVG--EG--CIVK--K--SQIHHSVLG--VR--SYV--DDH--CTLDNVLWL--GSDYYQS--LSEERADLDQ--GRVPL--GI  
161 PP--TKQLDCHVTESMIA--EG--CIK--N--CQINRSVLG--VR--SRV--ESG--CTLDNALVM--GADYYQP--FAERASGMGD--TSIPI--GI  
162 PP--SKLLDCEITESIVG--EG--CILK--K--CRIDHSVLG--VR--SRI--EAN--CIIQDSLML--GSDFYES--PTEERYGLK--GSVPI--GI  
163 PP--TKLLDCHVTEESIIG--EG--CILK--N--CRIQHSVLG--VR--SRI--ETG--CVIEESLLM--GADFYQA--SVERQCSIDK--GDIPV--GI  
164 PP--TKQLKCEVIQSMIS--EG--CVLK--D--CYIENSVIG--IR--SRI--DSG--CTIKNVLLM--GADYYQS--DFENEGDCSL--ENIPI--GI  
165 PP--TKVLNCTITESMIS--EG--CMIK--D--CRIHNSVLG--IR--SRI--ETD--CVVEDSLLM--GADYYES--LETROSLLDQ--GKIPI--GI  
166 PP--TKVLNADVITESMIS--EG--CIK--N--CRIHNSVLG--IR--TRV--EAD--CTIEDTMIM--GADYYQP--YEKRQDCLRR--GKPI--GI  
167 PP--SKLVDQAQITDSIVC--EG--TILK--S--CSILHCVLG--VR--TRI--ESD--SVLEDTLVM--GADFFES--PEERIELRKG--GGTPL--GV  
168 PP--SKIVDTQITDSIVS--EG--SILK--S--CSIHHCVLG--VR--SRI--ESD--VVLNETLVM--GSDFYES--VEERIALRNG--GGIPL--GV  
169 PP--SKLQDAQVTSIVG--EG--SILK--A--CSIHHCVLG--VR--SRI--EDE--VALQDTLVM--GNDFFES--GEERAILRER--GGIPM--GV  
170 PP--SKLVDQVTSIIG--EG--SILK--S--CSIHHSVLG--VR--SRV--EDE--VVLQDSLML--GSDFFES--SSERAVLRER--GGIPL--GV  
171 PP--TKMLNCTVITESMIS--EG--CILK--E--CRIHNSILG--IR--SRV--GKD--CTIEDTMLM--GADFYES--FPERESLIGN--AKIPV--GI  
172 PP--SKLVDQAQITDSIVC--EG--TILK--S--CSILHCVLG--VR--TRI--ESD--SVLEDTLVM--GADFFES--PEERIELRKG--GGTPL--GV  
173 PP--SKLQDAQVTEESIIG--EG--SLLK--A--CSIHHCVLG--VR--SRV--EDR--VVLQDTLVM--GSDYFES--SEERATLRQR--GGIPL--GV  
174 PP--TKMVDCTITESMIS--EG--CILK--E--CRIHNSVLG--IR--ARV--EAG--CTIEDSLLM--GLDFYES--SAQRKAASQA--GKVPQ--GI  
175 PP--SKLLNCDITESMIG--EG--CILK--N--CRIQHSVLG--VR--SRI--ESG--CVIEESLLM--GADYYQP--SVERQCSLEQ--GDIPV--GI  
176 PP--SKLLDCRVITESIIG--EG--CILK--D--CRIHNSVLG--LR--SRV--EAG--TVIEDTLIM--GADYYQS--LTERLSAQEQ--GGIPL--GI  
177 PP--SKLLDCHVTSIIG--EG--CILK--N--CRIENSVLG--VR--SRI--ESG--CIIQDSMIM--GADMYQP--FAERQSDCDH--RSVPL--GI  
178 PP--TKVLNCTITESMIS--EG--CMIK--D--CRIHNSVLG--IR--SRI--ETD--CVVEDSLLM--GADYYES--LETROSLLDQ--GKIPI--GI  
179 PP--TKQLKCEVIQSMIS--EG--CVLK--D--CYIENSVIG--IR--SRI--DSG--CTIKNVLLM--GADYYQS--DFENEGDCSL--ENIPI--GI  
180 PP--SKFVDSQITDSIIS--EG--SIK--A--CSIHHSVLG--VR--SRV--ENN--VVLQDSLML--GADFFES--QSERETLRR--GGIPV--GV  
181 PP--TKVFDSHITKSMIS--EG--CIK--K--CRIHNSILG--IR--SRI--EMN--CHIEDTMIM--GADFYES--STVNSSYSSP--KEIPI--GI  
182 PP--TKLLDTHVTEESIIG--EG--CILK--Q--CRIDHSVLG--VR--SRI--EAG--CTIQDTLVM--GADFYEP--DAERHSSLGT--GGVAL--GI  
183 PP--SKLLDCQVTEESIIG--EG--CILK--E--CRIDHSVLG--VR--SRI--EAG--CNIEDSLIM--GSDFYEP--FAERQSGSDK--GGVPL--GI  
184 PP--SKLLDCDIKESMIG--EG--CILK--N--CRIQHSVLG--VR--SRV--ESG--SIVEESLIM--GSDFYQP--SVERVCNLDK--GDIPV--GI  
185 PP--SKLLDCDIKESMIG--EG--CILK--N--CRIQHSVLG--VR--SRV--ESG--SIVEESLIM--GSDFYQP--SVERVCNLDK--GDIPV--GI  
186 PP--SKMLDCQITESIIA--EG--CILK--E--CRIDHSVLG--LR--SRV--ESG--SLVEDTMLM--GSDFYQP--FAERQYGLEK--GSVPI--GI  
187 PP--TKVLNCTITESMIS--EG--CMIK--D--CRINNSVLG--IR--SRI--ESD--CVVEDSLLM--GADFYES--LDRQSLLDQ--GKIPI--GI  
188 PP--SKLVDQAQITNSIVG--EG--SILK--S--CSIHHCVLG--VR--SRI--ESD--CVLQDTLVM--GADFFES--PDERAVLKER--GGIPL--GV  
189 PP--AKIEKCHVKDAIIS--HG--CSLA--D--CCVENAIVG--LR--SQV--GKG--CKIERAMII--GADFYES--EDQKAKVIAS--GGVPL--GI  
190 PP--SKLLDVQVRSSTIG--DG--CFIK--K--STISNSMIG--LR--TSI--SEG--CVIEDSMIM--GADYEE--THECEDLP--DCIPI--GI  
191 PP--AKVEKCHVKDAIIS--HG--CSLA--D--SKVEDAIVG--LR--SQI--GKG--CTIKHAMII--GADYYET--DEQKALVEA--GGVPL--GI  
192 PP--SKLLDAEIVSKCTIG--DG--CFIK--K--SKLTHNAMIG--LR--TNI--QED--CVIEDVMIM--GADYEE--THECEDLP--DCIPI--GI  
193 PP--ATVRNCKVTDIIA--QG--SFVS--D--CTINNAVIG--IR--SII--QON--CTIQDALVM--GADYYES--DDQATLLK--GGVPL--GI  
194 PP--SKVMDCDVNSIIG--DG--CVIK--AG--SKIHNSIIG--IR--SLI--GSD--CIIDSAMMM--GSDYYET--LEECEVVP--GCLPM--GV

195 PP--AKVERCHVKESIIS--HG--ASLA--D---CQVEESIIG--LR--SVV--NKG--CRIKRAMII--GADFYES--DEKKASILLAS--GEVPV--GI  
 196 PP--SKVQCEIERTSTIG--DG--CFIT--K---AKLKNVMVG--LR--STV--NAN--CDLEDTLVM--GADYYET--YDEAKTSALP--GGVPI--GI  
 197 PP--SKVLDADVMSIIG--DG--CVIK--AG--SKIHNISIIG--IR--SLV--GSD--CIIDSAMMM--GADYYET--LEECEYVP--GCLPM--GV  
 198 PP--ATVRNCKVSDAIIA--QG--SFVA--D---SSISNAVIG--IR--SII--GSG--CTVQDALIM--GADYYQS--DEQRAALLAA--GDVPV--GI  
 199 PP--AKIERCHVKDSIIS--HG--AALA--D---CSVESIIVG--LR--SRV--EAG--TKIKRTMII--GADFYES--EEKRKAILAA--GGVPV--GI  
 200 PP--SKVQCEIERTSTIG--DG--CTIK--Q---AKLKNVMVG--LR--STV--NEG--CDLEDTLVM--GADYYES--LEECPASLP--GCTPI--GI  
 201 PP--TKIEKCRVLDIVS--HG--CFLQ--E---CSVTHSVIG--IR--SRV--EAG--AEIQDTMML--GADFYET--EAEIASMVAE--GKVPV--GV  
 203 PP--SKLIDADVTDVIG--EG--CLIK--S---CKIHHSVIG--LR--SWI--AED--ALVEDALLM--GADFYET--DEERDALLLK--GGVPV--GI  
 204 PP--SKLIDADVTDVIG--EG--CLIK--S---CKIHHSVIG--LR--SWI--AED--ALVEDALLM--GADFYET--DEERDALLLK--GGVPV--GI  
 206 PP--TKMEKCRIIDSIIVS--HG--CFLK--S---CSVESHSLIG--VR--SRL--ESG--VELKDTIIM--GADSYET--EAEIAALRAQ--GKVPV--GV  
 207 PP--TKMEKCRIIDSIIVS--HG--CFLK--S---CSVESHSLIG--VR--SRL--ESG--VELKDTIIM--GADSYET--EAEIAALRAQ--GKVPV--GV  
 208 PP--TKIEKCRVLDIVS--HG--CFLQ--E---CSVTHSVIG--IR--SRV--EAG--AEIQDTMML--GADFYET--EAEIASMVAE--GKVPV--GV  
 209 PP--TKIEKCRVLDIVS--HG--CFLQ--E---CSVTHSVIG--IR--SRV--EAG--AEIQDTMML--GADFYET--EAEIASMVAE--GKVPV--GV

510 520 530 540 550 560 570 580 590  
 .....  
 1 G--KN--CHIKRAIID--KN--ARIG--DN--VKI--INKDNV--QEARE--TD--GYFIKS--G--IVTVI--KD--ALI--PSGIII--  
 2 G--KN--CHIKRAIID--KN--ARIG--DN--VEI--INKDNV--QEARE--TD--GYFIKS--G--IVTVI--KD--ALI--PSGIII--  
 3 G--KN--CHIKRAIID--KN--ARIG--DN--VKI--INKDDV--QEARE--TD--GYFIKS--G--IVTVI--KD--ALI--PSGIII--  
 4 G--KN--CHIKRAIID--KN--ARIG--DN--VKI--INKDNV--QEARE--TD--GYFIKS--G--IVTVI--KD--ALI--PSGIVI--  
 5 G--KN--SHIKRAIID--KN--ARIG--DN--VKI--INSDNV--QEARE--TD--GYFIKS--G--IVTVI--KD--ALI--PTGTVI--  
 6 G--KN--SHIKRAIID--KN--ARIG--DN--VKI--INSDNV--QEARE--TD--GYFIKS--G--IVTVI--KD--ALI--PTGTLI--  
 7 G--RN--SHIKRAIVD--KN--ARIG--EN--VKI--INSDNV--QEARE--TE--GYFIKS--G--IVTVI--KD--ALI--PSGTVI--  
 8 G--KN--SHIKRAIID--KN--ARIG--DD--VKI--INSDNV--QEARE--TE--GYFIKS--G--IVTVI--KD--ALI--PSGTVI--  
 9 G--RN--SHIKRAIID--KN--ARIG--EN--VKI--INSDNV--QEARE--TD--GYFIKS--G--IVTVI--KD--ALI--PSGTVI--  
 10 G--RN--SHIKRAIID--KN--ARIG--EN--VKI--INSDNV--QEARE--TD--GYFIKS--G--IVTVI--KD--ALI--PSGTVI--  
 11 G--KN--SHIKRAIID--KN--ARIG--DN--VKI--INGDNV--QEARE--TD--GYFIKS--G--IVTVI--KD--ALI--PSGTVI--  
 12 G--RN--SHIKRAIID--KN--ARIG--DN--VKI--INSDNV--QEARE--TD--GYFIKS--G--IVTVI--KD--ALI--PSGTVI--  
 13 G--KN--SHIKRAIID--KN--ARIG--DN--VKI--INSDNV--QEARE--TD--GYFIKS--G--IVTVI--KD--ALL--PSGTII--  
 14 G--EN--SHIKRAIID--KN--ARIG--DN--VKI--INTDNV--QEARE--TD--GYFIKS--G--IVTVI--KD--ALI--PSGTVI--  
 15 G--KN--SHIKRAIID--KN--ARIG--DD--VKI--INSDNV--QEARE--TD--GYFIKS--G--IVTVI--KD--AMI--PSGTVI--  
 16 G--KN--SHIKRAIID--KN--ARIG--DD--VKI--INSDNV--QEARE--TE--GYFIKS--G--IVTVI--KD--ALI--PSGTVI--  
 17 G--KN--SHIKRAIVD--KN--ARIG--EN--VKI--INSDNV--QEARE--TE--GYFIKS--G--IVTVI--KD--ALI--PSGTVI--  
 18 G--KN--SHIRRAIID--KN--ARIG--DN--VKI--INSDNV--QEARE--TE--GYFIKS--G--IVTVI--KD--ALI--PSGTVI--  
 19 G--RN--SHIKRAIVD--KN--ARIG--EN--VKI--INSDNV--QEARE--TD--GYFIKS--G--IVTVI--KD--ALI--PSGTVI--  
 20 G--RN--SHIKRAIID--KN--ARIG--ED--VKI--VNGDNV--QEARE--TD--GYFIKS--G--IVTVI--KD--ALI--PSGTVI--  
 21 G--RN--SHIKRAIID--KN--ARIG--EN--VKI--VNGDNV--QEARE--TD--GYFIKS--G--IVTVI--KD--ALI--PSGTII--  
 22 G--KN--SHIKRAIID--KN--ARIG--NN--VKI--VNDVSV--QEARE--TD--GYFIKS--G--IDTII--KD--ALI--PSGTII--  
 23 G--KN--SHIKRAIID--KN--ARIG--DN--VKI--VNSDSV--QEARE--TD--GYFIKS--G--IVTVI--KD--ALI--PSGTII--  
 24 G--KN--SHIKRAIID--KN--ARIG--DN--VKI--IKSDNV--QETARE--TD--GYFIKS--G--IVTVI--KD--AWI--PSGTVI--  
 25 G--RN--SHIKRAIID--KN--ARIG--ND--VKI--INNDNV--QEARE--TE--GYFIKS--G--IVTVI--KD--ALI--PSGTII--  
 26 G--RN--SHIKRAIID--KN--ARIG--DN--VKI--INSDNV--QEARE--TD--GYFIKS--G--IVTVI--KD--ALI--PSGTVI--  
 27 G--KN--SHIKRAIID--KN--ARIG--EN--VKI--INSDNV--QEARE--TD--GYFIKS--G--IVTVI--KD--ALI--PSGTII--  
 28 G--KN--THIKRAIID--KN--ARIG--EN--VKI--VNGDNV--QEARE--TD--GYFIKS--G--IVTVI--KD--ALI--PSGTMI--  
 29 G--RN--SHVRAIID--KN--ARIG--EN--VKI--LNSDNV--QEARE--TD--GYFIKS--G--IVTVI--KD--ALI--PSGTVI--  
 30 G--KN--SHIRRAIID--KN--ARIG--DD--VKI--INSDNV--QEARE--TE--GYFIKS--G--IVTVI--KD--ALI--PSGTVI--  
 31 G--KN--SHIKRAIVD--KN--ARIG--EN--VKI--INSDNV--QEARE--TE--GYFIKS--G--IVTVI--KD--ALI--PSGTVL--  
 32 G--KN--SHIRKAIID--KN--ARIG--EN--VKI--INFDNV--QEAVRE--TE--GYFIKS--G--IVTVI--KD--ALI--PSGTII--  
 33 G--KN--SCIRRAIID--KN--ARIG--DN--VKI--LNADNV--QEARE--TD--GYFIKS--G--IVTVI--KD--ALL--PSGTVI--  
 34 G--KN--SCIRRAIID--KN--ARIG--DN--VKI--LNADNV--QEARE--TD--GYFIKS--G--IVTVI--KD--ALL--PSGTVI--  
 35 G--KN--SCIRRAIID--KN--ARIG--DN--VKV--FQTDV--TVKNIN--LD--FSL--G--YIIL--DM--PFC--PLFNIIYF  
 36 G--KN--SHIRKAIID--KN--ARIG--DN--VKI--LNADNV--QEARE--TD--GYFIKS--G--IVTVI--KD--ALL--PSGTVI--  
 37 G--KN--CHIRRAIID--KN--ARIG--DN--VKI--INVDNV--QEARE--TD--GYFIKS--G--IVTVI--KD--ALL--PSGTVI--  
 38 G--KN--AHIRKAIID--KN--ARIG--EN--VKI--INVDNI--QEAARE--TD--GYFIKS--G--IVTVI--KD--ALI--PSGTVI--  
 39 G--KN--CHIRRAIID--KN--ARIG--DN--VKI--INVDNV--QEARE--TD--GYFIKS--G--IVTVI--KD--ALL--PSGTVI--  
 41 G--KN--SHIKRAIID--KN--ARIG--DN--VKI--INVDNV--QEARE--TD--GYFIKS--G--IVTVI--KD--ALL--PSGTVI--  
 42 G--KN--SHIKRAIID--KN--ARIG--DN--VKI--INVDNV--QEARE--TD--GYFIKS--G--IVTVI--KD--ALL--PSGTVI--  
 43 G--KN--AHIRKAIID--KN--ARIG--EN--VKI--INFDNV--QEAARE--TE--GYFIKS--G--IVTVI--KD--ALI--PSGTII--  
 44 G--KN--THIKRAIID--KN--ARIG--EN--VKI--INVDDI--QEASRE--SD--GYFIKS--G--IVTVI--KD--ALI--PSGTVI--  
 45 G--KN--SHIKRAIID--KN--ARIG--DN--VMI--INVDNV--QEARE--TD--GYFIKS--G--IVTVI--KD--ALL--PSGTVI--  
 46 G--KN--SHIKRAIID--KN--ARIG--DN--VMI--INVDNV--QEARE--TD--GYFIKS--G--IVTVI--KD--ALL--PSGTVI--  
 47 G--KN--AHIRKAIID--KN--ARIG--EN--VKI--INVDDI--QEASRE--SD--GYFIKS--G--IVTVI--KD--ALI--PSGTVI--  
 48 G--KN--SHIKRAIID--KN--ARIG--DN--VMI--INVDNV--QEARE--TD--GYFIKS--G--IVTVI--KD--ALL--PSGTVI--  
 49 G--EN--TKIRKCIID--KN--AKIG--KN--VSI--INKDGV--QEADRP--EE--GFYIRS--G--IIII--EK--ATI--RDGTVI--  
 50 G--PN--TKIQNCIID--KN--AKIG--KD--VVI--LNKQGV--EEADRS--AE--GFYIRS--G--ITVIM--KN--ATI--KDGTVI--  
 51 G--EN--TRIKDCIID--KN--ARIG--KN--VVI--ANSEGV--QEADRS--SE--GFYIRS--G--ITVIS--KN--STI--PDGTVI--  
 52 G--EN--TKIQECIID--KN--ARVG--KN--VII--ANSEGI--QEADRS--SD--GFYIRS--G--ITVIL--KN--SVI--KDGTVI--  
 53 G--QN--TKIKNCIID--KN--AKIG--KN--VVI--ANADGV--EEGDRP--EE--GFHIRS--G--ITVVL--KN--ATI--RDGLHI--  
 54 G--RD--TKIRKCIID--KN--AKIG--KN--VVI--MKNDDV--KEADRP--EE--GFYIRS--G--ITVVV--EK--ATI--KDGTVI--  
 55 G--KD--TKIRKCIID--KN--AKIG--KN--VII--MKNQGV--QEADRP--EE--GFYIRS--G--ITVIV--EK--ATI--QDGTVI--  
 56 G--EN--TKIRKCIID--KN--AKIG--KN--VSI--INKDGV--QEADRP--EE--GFYIRS--G--IIIIA--EK--ATI--RDGTVI--  
 57 G--PN--TKIQKCIID--KN--AKIG--KD--VVI--LNKQGV--EEADRS--AE--GFYIRS--G--ITVIM--KN--ATI--KDGTVI--  
 58 G--EN--TRIKECIID--KN--ARIG--KN--VVI--ANSEGV--QEADRS--SE--GFYIRS--G--ITVIL--KN--STI--PDGTVI--  
 59 G--EN--TKIRKCIID--KN--AKIG--KN--VSI--INKDGV--QEADRP--EE--GFYIRS--G--IIII--EK--ATI--RDGTVI--  
 60 G--PN--TKIQKCIID--KN--AKIG--KD--VVI--LNKQGV--EEADRS--AE--GFYIRS--G--ITVIM--KN--ATI--KDGTVI--  
 61 G--EN--TKIKECIID--KN--ARVG--KN--VII--ANSEGI--QEADRS--SD--GFYIRS--G--ITVIL--KN--SII--KDGTVI--  
 62 G--QN--TKIRNCIID--KN--AKIG--KN--VVI--ANAEGV--EEGDRP--EE--GFHIRS--G--ITVVL--KN--ATI--RDGLHI--

63 G--RD--TKIRKCIID--KN--AKIG--KN--VMI--LNKDDV--KEADRP--EE--GFYIRS--G--ITVVV--EK--ATI--KDSTVI--  
64 G--RD--TKVRKCIID--KN--AKIG--KN--VII--MNKGDV--QEDRP--EE--GFYIRL--G--ITVIV--EK--ATI--QDGTVI--  
66 G--KN--TKIVNCIID--KN--ARIG--NN--VII--ANKDNV--QEDRP--SE--GFYIRS--G--ITVVL--KE--SVI--SNGTII--  
67 G--EN--TKIKDCIID--KN--ARIG--KN--VVI--ANSEGI--QEDRS--SE--GFYIRS--G--VTIVL--KN--SVI--EDGFII--  
68 G--EN--TRIRNCIID--KN--ARIG--RN--VII--ANTDGV--QEDRP--AE--GFYIRS--G--IVVVV--KN--ATI--EDGTVI--  
69 G--EN--TKIRNCIID--KN--ARIG--RN--VII--ANTDGV--QEDRP--ME--GFYIRS--G--ITVVA--NN--ATI--EDGTVI--  
70 G--RN--TKIRNCIID--KN--AKIG--KD--VII--MNKGDV--QEDRP--ED--GFYIRS--G--ITVIL--EK--ATI--EDGTVI--  
71 G--RN--TKIRNCIID--KN--AKIG--KD--VII--MNKGDV--QEDRP--ED--GFYIRS--G--ITVIL--EK--ATI--EDGTVI--  
72 G--EN--TKIKDCIID--KN--ARIG--KN--VVI--ANSEGI--QEDRS--SE--GFYIRS--G--VTIVL--KN--SVI--EDGFII--  
73 G--AN--TKIRNCIID--KN--AKIG--RN--VII--ANTDGV--QEDRA--KE--GFYIRS--G--ITVIL--KN--ATI--KDGTVI--  
74 G--RN--TKIRNCIID--KN--AKIG--KD--VII--ANKDGV--QEDRP--ED--GFYIRS--G--ITIIIM--EK--ATI--EDGTVI--  
75 G--EN--TKIRNCIID--KN--AKIG--RN--VVI--ENIDGV--QEDRA--KE--GFYIRS--G--ITITL--KN--ATI--KDGTVI--  
76 G--RN--TKIRNCIID--KN--AKIG--KD--VII--ANKDGV--QEDRP--ED--GFYIRS--G--ITIIIM--EK--ATI--EDGTIV--  
77 G--KN--TKIVNCIID--KN--ARIG--NS--VII--ANKDNV--QEDKP--TD--GFYIRS--G--ITVVL--KD--SVI--SNDTII--  
80 G--SN--SKVRKCIID--KN--ARIG--KD--VII--MNKGDV--QEDRP--ED--GFYIRS--G--ITIVM--EK--ATI--EDGTVI--  
81 G--KD--TKIMNCIID--KN--ARIG--KN--VII--ANKEGV--QEAERP--SE--GFYIRS--G--ITVVL--KN--SVI--KDGTHI--  
82 G--RN--TKIRNCIID--KN--AKIG--KD--VII--MNKGDV--QEDRE--EE--GFYIRS--G--ITIIIS--EK--ATI--EDGTVI--  
84 G--EN--TKIKECIID--KN--ARIG--KN--VVI--ANSEGI--QEDRS--ME--GFYIRS--G--VTIVL--KN--SVI--QDGTVI--  
87 G--EN--TKIRECIID--KN--ARIG--KN--VVI--ANSEGI--QEDRS--SE--GFYIRS--G--VTIIL--KN--SVI--QDGFVI--  
88 G--QE--TKIMNCIID--KN--ARIG--KN--VVI--ANKDGV--EADRP--SE--GFYIRS--G--ITVVL--KN--SEI--KDGTHI--  
89 G--RN--TKIKNCIID--KN--AKIG--KD--VVI--VNKDGV--QEDRP--EE--GFYIRS--G--ITIIIM--EK--ATI--EDGTVI--  
90 G--QN--TKIRNCIID--KN--ARIG--RG--VVI--TNADGV--QEDRP--EE--GFYIRS--G--ITVIM--EN--ATI--NDGTII--  
91 G--QN--TRIRNCIID--KN--AKIG--RD--VVI--ANADGV--QEDRP--SE--GFYIRS--G--ITVIL--KN--ATI--NDGTII--  
92 G--KG--TKIMNCIID--KN--ARIG--KN--VVI--TNKDKV--EADRP--SE--GFYIRS--G--ITVVL--KN--SVI--MDGTII--  
94 G--EN--TRIKDCIID--KN--ARIG--KN--VVI--SNSEGI--QEDRS--LE--GFYIRS--G--ITIIL--KN--FTI--KDGFTI--  
95 G--RN--TKIRNCIID--KN--AKIG--KD--AVI--MNKGDV--QEDRP--DD--GFYIRS--G--ITIIL--EK--ATI--KDGTVI--  
96 G--QN--TKIRNCIID--KN--AKIG--KD--VII--TNADGV--QEDRP--SE--GFYIRS--G--ITAVL--KN--AAI--KDGTLI--  
97 G--RN--TKIRNCIID--KN--AKIG--KD--VII--TNKDGV--QEDRE--EK--GFYIRS--G--ITIIL--EK--ATI--EDGTVI--  
98 G--QN--TKIRNCIID--KN--AKIG--KD--VII--TNADGV--QEDRP--SE--GFYIRS--G--ITAVL--KN--ATI--KDGTHI--  
99 G--EN--TTIQKCIID--KN--ARIG--KK--VVI--SNSEGV--EADRT--SE--GFYIRS--G--ITVVL--KN--AII--ADGLVI--  
100 G--RN--TKIRNCIID--MN--ARIG--KN--VVI--TNSKGI--QEAHP--EE--GYIRS--G--IVVIL--KN--ATI--NDGSVI--  
101 G--EN--TKISNCIID--MN--CQGW--KE--RLH--NKQRGRS--KSPDRP--GR--RILIRS--G--IVVVL--KN--ATI--KDGTVI--  
102 G--EN--TKIRNCIID--KN--ARIG--KN--VVI--MISENV--QEDRP--AE--GYIRS--G--ITVVL--KN--AVI--LNGTKI--  
103 G--EN--AKISNCIID--MN--ARIG--RD--VII--ANSEGV--EADRA--EE--GYIRS--G--IVVIL--KN--ATI--KDGTVV--  
104 G--EN--TKIRNCIID--KN--ARIG--KN--VVI--MISENV--QEDRP--SE--GYIRS--G--ITVVL--KN--AVI--PDDTII--  
105 G--EN--TTIQNCIID--KN--ARIG--KN--VTI--ANSEGV--QADRT--SE--GFHIRS--G--ITVVL--KN--SVI--ADGLVI--  
106 G--EN--TKIQNCIID--KN--ARIG--KN--VTI--SNSEGV--QADRT--SE--GFYIRS--G--ITIVL--KN--SII--ADGLVI--  
107 G--EN--TKINNCIID--MN--ARVG--RN--VVI--TNSSEGV--QESDRP--EE--GYIRS--G--IVVIL--KN--ATI--KDGKVI--  
108 G--EN--TIIRNCIID--KN--ARIG--KN--VMI--MNSQNV--QEAERP--LE--GFYIRS--G--ITVVL--KN--AVI--PDGTVI--  
109 G--EN--TKIRNCIID--MN--ARIG--RN--VII--ANTQGV--QESDHP--EE--GYIRS--G--IVVIL--KN--ATI--KDGTVI--  
110 G--EN--TKISNCIID--MN--ARVG--RN--VSI--TNTEGV--QEDRP--EL--GYIRS--G--IVVIL--KN--ATI--KDGTVI--  
111 G--GN--TKIRNCIID--IN--ARIG--KN--VVI--TNSKGI--QEAHP--EE--GYIKS--G--IVVIL--KN--ATI--KDGSVI--  
112 G--EN--TTIQKCIID--KN--ARIG--KN--VII--SNSEGV--EADRT--SE--GFYIRT--G--VTVVL--KN--SII--ADGLVI--  
113 G--EN--TKISNCIID--MN--ARIG--RD--VVI--SNKEGV--QEDRP--EE--GYIRS--G--IVVIQ--KN--ATI--KDGTVV--  
114 G--EN--TSIQNCIID--KN--ARIG--KN--VTI--ANTEGV--QESDRT--SE--GFHIRS--G--ITVVL--KN--SVI--ADGLVI--  
115 G--EN--TKISNCIID--MN--ARIG--RD--VVI--SNKEGV--QEDRP--EE--GYIRS--G--IVVIQ--KN--ATI--KDGTVV--  
116 G--EN--TKIKDCIID--KN--ARIG--KN--ATI--SNVDGV--QEDRS--AE--GFYTRS--G--ITVIL--KN--STI--PDGFAI--  
117 G--EN--TKISNCIID--MN--ARIG--RD--VVI--SNKEGV--QEDRP--EE--GYIRS--G--IVVIQ--KN--ATI--KDGTVV--  
118 G--EN--TSIQNCIID--KN--ARIG--KN--VTI--ANAEGV--QESDRA--SE--GFHIRS--G--ITVVL--KN--SVI--ADGLVI--  
119 G--EN--TKISNCIID--MN--ARIG--RD--VVI--SNKEGV--QEDRP--EE--GYIRS--G--IVVIQ--KN--ATI--KDGTVV--  
120 G--EN--TKISNCIID--MN--ARIG--RD--VVI--SNKEGV--QEDRP--EE--GYIRS--G--IVVIQ--KN--ATI--KDGTVV--  
121 G--QG--TTVKRAILD--KN--TRIG--SN--VTI--VNKDGV--EADRP--EL--GFYIRN--G--IVVVV--KN--ASI--PDGTVI--  
122 G--NN--TTIRRAIVD--KN--ARIG--RH--VQI--INKDHV--QEAERE--ED--GFYIRG--G--ITVIL--KN--AVI--QDGTII--  
123 G--TD--TIIRRAIVD--KN--ACIG--HD--VKI--INKDNV--QEAERE--NQ--GFYIRS--G--IVVVL--KG--AVI--ADGTII--  
124 G--KG--STIRRAIVD--KN--ARIG--RN--VTI--VNKENI--EESNRE--DE--GFYIRN--G--IVVAI--KN--AII--PDGTVI--  
125 G--SN--TTIDHAIVD--KN--ARIG--CN--VKI--INKDNV--SEAEKE--DQ--GFYIRS--N--ITIIL--KD--AVI--PHDVTI--  
126 G--RG--TTVKRAILD--KN--VRIG--RD--VTI--VNKDRV--EADRP--EL--GFYIRN--G--IVVVV--KN--ATI--ADGTVI--  
127 G--RG--TTVKRAILD--KN--ARIG--DN--VTI--VNKDNV--EADRP--EL--GFYIRN--G--IVVVV--KN--ASI--PDHSVI--  
128 G--RG--TTVRRAILD--KN--VRIG--RN--VTI--VNKDGII--EADRP--EL--GFYIRN--G--IVVVE--KN--ATI--ADGTVI--  
129 G--AD--TTIRRAIVD--KN--ARIG--SN--VTI--TNKEDV--QEAERE--EL--GFYIRS--G--IVTIL--KN--AVI--PDGTVI--  
130 G--EG--STVKRAILD--KN--TRIG--RN--VTI--INKDNV--EADRP--EL--GFYIRN--G--IVVVC--KN--ATI--PDGMVI--  
131 G--PG--TTVKRAILD--KN--TRIG--SN--VSI--INKDGV--EADRS--DL--GFYIRN--G--IVVQ--KN--ATI--QDGTVI--  
132 G--KG--TTVKRAILD--KN--ARIG--SN--VTI--VNKDGV--EADRP--EH--GFYIRN--G--IVVVV--KN--ASI--PDGTVI--  
133 G--ER--CVLQKAIID--KN--ARIG--ND--VRI--LNKERP--DSADHP--ER--GFYIRH--G--IVIVP--KD--TVI--PDGTVI--  
134 G--EG--STIKRAILD--KN--ARIG--DN--VVI--VNKDRV--EADKP--DV--GFYIRN--G--IVVVV--KN--ATI--ANGTII--  
135 G--QG--TTVKRAILD--KN--TRIG--EN--VTI--INKDRI--EADRA--DQ--GFYIRN--G--IVVVV--KN--ASI--LDGTII--  
136 G--AN--SVIRRAIVD--KN--ACIG--RD--VKI--INKDNV--EESNRE--DQ--GFYIRS--G--VVVVI--KN--AVI--PDGTII--  
137 G--EG--STIRRAIVD--KN--ARIG--RN--VTI--VNKENI--DESNQE--ES--GFYIRN--G--IVVIL--KN--ATI--ADGTVI--  
138 G--TD--TIIRGAIVD--KN--ARIG--HD--VKI--VNKDNV--QEAERE--NQ--GFYIRS--G--IVVVL--KN--AVI--PDGTII--  
139 G--EG--TTVKGAILD--KN--TRIG--NN--VTI--VNKDGV--EADRA--DE--GFYIRN--G--IVVVV--KN--ATI--SDGTVI--  
140 G--AN--SHIVNAIVD--KN--ARIG--RN--VRI--LNKDHV--TEAQRE--EE--GIWISN--G--IVTII--KD--SVI--PDNTII--  
141 G--AN--SHIVNAIVD--KN--ARIG--RN--VRI--LNKDHV--SEAQRE--EE--GIWISN--G--IVTII--KD--SVI--PDNTVI--  
142 G--QG--TTVKGAILD--KN--TRIG--NN--VTI--VNKDGV--EADRA--DE--GFYIRN--G--IVVVV--KN--ATI--SDGTVI--  
143 G--QG--TTVKGAILD--KN--ARIG--SN--VTI--VNKDGV--EADRS--DQ--GFYIRN--G--IVVVV--KN--ATI--QDGTVI--  
144 G--PD--TIIRRAIVD--KN--ARIG--HD--VKI--INKDNV--QEAERE--SQ--GFYIRS--G--IVVVL--KN--AVI--TDGTII--  
145 G--QG--TTVKRAILD--KN--ARIG--EN--VAI--VNKDNV--EADRP--EE--GFYIRN--G--IVVVV--KN--ATI--SDGTII--  
146 G--EG--TTVKRAILD--KN--TRIG--DN--VVI--INKDRV--EADKP--EL--GFYIRN--G--IVVVV--KN--ATI--ANGTVI--

147 G--QG--TTVKRAILD--KN--ARIG--DN--VTI--VNKDNV--EEADRA--DQ--GFYIRN--G--IVVIV--KN--ATI--PDGTII--  
148 G--EG--TTVKRAILD--KN--TRIG--DN--VVI--INKDRV--EEADKP--EL--GFYIRN--G--IVVVV--KN--ATI--ANGTVI--  
149 G--VG--STIKRAILD--KN--ARIG--DN--VVI--VNKDRV--EEADKP--EL--GFYIRN--G--IVVVV--KN--ATI--ANGTII--  
150 G--EG--TTVKGAILD--KN--ARIG--KN--VTI--VNKDRV--EEADRP--DQ--GFYIRN--G--IIVVV--KN--ASI--ADDTVI--  
151 G--AG--TTIRRAIID--KN--ARIG--RN--VLI--INKDRI--EEAERE--DE--GFLIRS--G--IVVVI--KN--ATI--PDGTVI--  
152 G--EG--TTVKRAILD--KN--TRIG--DN--VVI--INKDRV--EEADKP--EL--GFYIRN--G--IVVVV--KN--ATI--ANGTVI--  
153 G--SG--TTIRRAIID--KN--ARIG--KN--VMI--VNKENV--QEANRE--EL--GFYIRN--G--IVVVI--KN--VTI--ADGTVI--  
154 G--EG--STIRRAIVD--KN--ARIG--RN--VTI--VNKENI--DESNQE--ES--GFYIRN--G--IVVIL--KN--ATI--ADGTVI--  
155 G--SG--STIRRAIVD--KN--AHIG--QN--VQI--VNKDHV--EEADRE--DL--GFMIRS--G--IVVVV--KG--AVI--PDNTVI--  
156 G--AD--TIVRRAIVD--KN--ACIG--RN--VKI--VNKDHV--EEANRE--SE--GFYIRN--G--IVVVL--KN--AVI--PDNTVI--  
157 G--SG--STIRRAIVD--KN--AHIG--QN--VQI--VNKDHV--EEADRE--DL--GFMIRS--G--IVVVV--KG--AVI--PDNTVI--  
158 G--KG--TTVKRAILD--KN--TRIG--SG--VSI--INKDNV--EEADRS--DQ--GFYIRN--G--IVVVQ--KN--ATI--ADGTVI--  
159 G--PG--TTVKRAILD--KN--TRIG--SN--VSI--INKDHV--EEADRS--DL--GFYIRN--G--IVVVQ--KN--ATI--QDGTVI--  
160 G--EN--TVIRRAIVD--KN--ARIG--KN--VKI--VNKAQV--EEANHE--DE--GFYIRS--G--IVVIL--KN--AII--PDNTEI--  
161 G--EN--TKISRAIID--KN--ARIG--RN--VKI--VNKDNV--EESNQE--EH--GFYIRS--G--IVVVL--KN--AEI--PDNTII--  
162 G--AE--TKIRGAIID--KN--ARIG--CN--VQI--INKDNV--EEAQRE--EE--GFYIRS--G--IVVVL--KN--ATI--PDGTVI--  
163 G--PD--TIIRRAIID--KN--ARIG--HD--VKI--INKDNV--QEADRE--SQ--GFYIRS--G--IVVVL--KN--AVI--TDGTII--  
164 G--SN--TTIDHAIID--KN--ARIG--CN--VKI--INKDNV--EEAKE--DQ--GFYIRS--N--IITVV--KD--AVI--PDGTVI--  
165 G--KG--STIRRAIVD--KN--ARIG--QN--VTI--VNKENI--EESNRE--DD--GFYIRN--G--IVVVI--KN--AVI--PDGTVI--  
166 G--EG--TTIRRAIID--KN--ARIG--KN--VMI--VNKENV--EESNRE--EL--GYIRS--G--ITVVL--KN--AVI--PDGTVI--  
167 G--EG--TTVKRAILD--KN--TRIG--DN--VVI--INKDRV--EEADKP--EL--GFYIRN--G--IVVVV--KN--ATI--ANGTVI--  
168 G--QG--TTVKRAILD--KN--ARIG--DN--VTI--VNKDNV--EEADRA--DQ--GFYIRN--G--IVVIV--KN--ATI--PDGTII--  
169 G--RG--TTVKKAILD--KN--VRIG--SN--VSI--INKDNV--EEADRA--EQ--GFYIRG--G--IVVIT--KN--ASI--PDGMVI--  
170 G--KG--TTVKRAILD--KN--ARIG--SN--VTI--VNKDHV--EEADRP--EH--GFYIRN--G--IVVVV--KN--ASI--PDGTVI--  
171 G--SG--STIRRAIVD--KN--ARIG--SN--VLI--VNKDRV--EEANRE--DL--GFYIRS--G--IVVIF--KN--ATI--PDGTVI--  
172 G--EG--TTVRRRAILD--KN--TRIG--DN--VVI--INKDRV--EEADKP--EL--GFYIRN--G--IVVVV--KN--ATI--ANGTVI--  
173 G--SG--TTVRGAILD--KN--VRIG--RD--VTI--VNKDRV--EEADRP--EL--NFYIRN--G--IVVVV--KN--GTI--ADGTVI--  
174 G--AG--TTIRRAIID--KN--AHIG--KN--VLI--INKDRI--EEADRE--DQ--GFLIRN--G--IVVVM--KN--ATI--PDGTVI--  
175 G--TN--TIIRRAIID--KN--ARIG--HD--VKI--INKDNV--QEARE--KQ--GFFIRS--G--IVVVL--KN--AVI--PDGTII--  
176 G--KD--TVIRRAIVD--KN--ACIG--NN--VKI--FNKDRV--EEANCE--SE--GFYIRN--G--IVVVL--KN--AVI--PDGAVI--  
177 G--SN--TIIRRAIID--KN--THIG--CD--VQI--VNKDNV--QEARE--SQ--GFYIRS--G--IVVVL--KN--AVI--PDGTII--  
178 G--KG--STIRRAIVD--KN--ARIG--QN--VTI--VNKENI--EESNRE--DD--GFYIRN--G--IVVVI--KN--AVI--PDGTVI--  
179 G--SN--TTIDHAIID--KN--ARIG--CN--VKI--INKDNV--SEAKE--DQ--GFYIRS--N--IITVV--KD--AVI--PHDTVI--  
180 G--EG--TTVKRAILD--KN--ARIG--KN--VTI--VNKDHV--EEADRP--EH--GFYIRN--G--IVVVV--KN--ASI--ADDTVI--  
181 G--KN--SLIKHAIID--KN--ARIG--EN--VII--LNKNDI--QESSRE--DE--GFYICD--G--IVVII--KN--AVI--QSGTVI--  
182 G--AD--TTIRRAIVD--KN--ARIG--RN--VQI--INKDRV--EEANRE--NQ--GFYIRS--G--IIVVL--KN--ATI--PDGTII--  
183 G--AQ--TRIRRAIVD--KN--ARIG--RH--VQI--INKDRV--EEAERE--DQ--GFYIRS--G--IVVVL--KN--AII--SDGTII--  
184 G--TD--TIIRRAIID--KN--ARIG--HN--VRI--INKDNV--QEARE--KQ--GFYIRS--G--IVVVL--KN--AVI--PDGTII--  
185 G--TD--TIIRRAIID--KN--ARIG--HN--VRI--INKDNV--QEARE--KQ--GFYIRS--G--IVVVL--KN--AVI--PDGTII--  
186 G--NN--TTIRRAIVD--KN--ARIG--RH--VQI--INKDHV--QEARE--ED--GFYIRG--G--ITVIL--KN--AVI--PDGTII--  
187 G--KG--STIRRAIVD--KN--ARIG--TN--VNI--VNKENI--EESNRE--DD--GFYIRN--G--IVVVI--KN--AVI--PDGTVI--  
188 G--KG--TTVRRRAILD--KN--TRIG--SG--VSI--INKDNV--EEADRS--DQ--GFYIRN--G--IVVVQ--KN--ATI--ADGTVI--  
189 G--EG--CTITNAIID--KN--ARIG--KN--CII--TNASGI--EDLEDE--EN--GVYIRS--G--IVTIL--RN--ATI--PDGTVI--  
190 G--AG--TVIRRAIVD--KN--ARIG--MD--CQL--INKDNV--QEANEE--EK--GYIIRD--G--IIVIV--KD--SYI--PNGTII--  
191 G--EG--CSISNAIID--KN--ARIG--KN--CII--TNAAGV--EDLEDE--EN--GIYIRS--G--IVTIL--RN--ATI--PDGTVI--  
192 G--AG--TTIKRAIID--KN--ARIG--MD--CQI--INKDNV--QEANHE--DK--GYIIRD--G--IVVIC--KD--AII--PNGTII--  
193 G--AN--SVITNAIID--KN--ARVG--KN--VKI--VNKEGV--TEGTRE--AE--GIYIRS--G--IVVID--KG--ALV--PDNTTI--  
194 G--DG--SIIRRAIVD--KN--ARIG--PK--CQI--INKDGV--KEANRE--DQ--GFVIKD--G--IVVVI--KD--SHI--PAGTII--  
195 G--EG--TIIENAIID--KN--ARVG--KN--CVI--TNAAGV--EDLADE--ER--GVFIRN--G--IITIL--RN--CTI--PDGTII--  
196 G--AG--TKIRKAIID--KN--ARIG--EN--CQI--LNEAGV--MDKDCE--NE--GYIIRD--G--IIVVI--KD--AVI--KPGTVI--  
197 G--DG--SVRRAIVD--KN--ARIG--PK--CQI--INKDGV--KEANRE--EQ--GFVIKD--G--IVVVI--KD--SCI--PAGTII--  
198 G--AN--SIISNAIID--KN--ARVG--KN--VRI--VNKDG--SEGTRE--SE--GIYIRS--G--IVVID--KG--AKV--PDNATI--  
199 G--EN--TIIENAIID--KN--ARVG--KN--CVI--TNKDNI--EDLADE--ER--GVFIRN--G--IVTIL--RN--CTI--PDGTVI--  
200 G--AG--TKIRKAIID--KN--ARIG--EN--CQI--LNEAGV--MDKDCE--SE--GYIIRD--G--IIVVI--KD--AVI--KAGTVI--  
201 G--QN--AKIRNCILD--KN--VRIG--KN--VVI--ANKDNV--QEAEKP--SE--GYIIRS--G--ITVIL--KN--ATI--ADGTVI--  
203 G--KG--SVVRRRAIVD--KN--ARIG--QN--I--INKDGV--QEARE--TD--GFFINC--G--IVTVI--KD--AVI--PNSVVI--  
204 G--KG--SVVRRRAIVD--KN--ARIG--QN--I--INKDGV--QEARE--TD--GFFINC--G--IVTVI--KD--AVI--PNSVVI--  
206 G--EH--TTMRNCLVD--KN--ARIG--SH--VII--TNTDGV--QEAREP--SE--GIYIRS--G--ITVVV--KN--SIV--KDGTVI--  
207 G--EH--TTMRNCLVD--KN--ARIG--SH--VII--TNTDGV--QEAREP--SE--GIYIRS--G--ITVVV--KN--SIL--KDGTVI--  
208 G--QN--AKIRNCILD--KN--VRIG--KN--VVI--ANKDNV--QEAEKP--SE--GYIIRS--G--ITVIL--KN--ATI--ADGTVI--  
209 G--QN--AKIRNCILD--KN--VRIG--KN--VVI--ANKDNV--QEAEKP--SE--GYIIRS--G--ITVIL--KN--ATI--ADGTVI--
