# Supplementary material for: The ancestral activation promiscuity of ADP-glucose pyrophosphorylases from oxygenic photosynthetic organisms
Source: PubMed Central journal article supplement (PMC3585822; doi:10.1186/1471-2148-13-51), 2013-02-21
Supplement: 1471-2148-13-51-S2.pdf [file 1471-2148-13-51-S2.pdf]

**Table S1**

| Number | Accession | Annotation                                                                | Organism                                        | Taxonomy |
|--------|-----------|---------------------------------------------------------------------------|-------------------------------------------------|----------|
| 1      | 62738704  | Chain A, Crystal Structure Of Potato Tuber Adp-Glucose Pyrophosphorylase  | <i>Solanum tuberosum</i>                        | dicot    |
| 2      | 27819107  | ADP-glucose pyrophosphorylase small subunit                               | <i>Solanum tuberosum</i>                        | dicot    |
| 3      | 77416911  | ADP-glucose pyrophosphorylase small subunit-like                          | <i>Solanum tuberosum</i>                        | dicot    |
| 4      | 556351    | ADP-glucose pyrophosphorylase small subunit                               | <i>Solanum tuberosum</i>                        | dicot    |
| 5      | 15238933  | glucose-1-phosphate adenyltransferase small subunit                       | <i>Arabidopsis thaliana</i>                     | dicot    |
| 6      | 297791999 | hypothetical protein ARALYDRAFT_494882 agps                               | <i>Arabidopsis lyrata</i> subsp. <i>lyrata</i>  | dicot    |
| 7      | 357495273 | Glucose-1-phosphate adenyltransferase                                     | <i>Medicago truncatula</i>                      | dicot    |
| 8      | 357462397 | Glucose-1-phosphate adenyltransferase                                     | <i>Medicago truncatula</i>                      | dicot    |
| 9      | 356552274 | PREDICTED: glucose-1-phosphate adenyltransferase small subunit, isoform 1 | <i>Glycine max</i>                              | dicot    |
| 10     | 356501687 | PREDICTED: glucose-1-phosphate adenyltransferase small subunit, isoform 2 | <i>Glycine max</i>                              | dicot    |
| 11     | 224131934 | predicted protein                                                         | <i>Populus trichocarpa</i>                      | dicot    |
| 12     | 255567204 | glucose-1-phosphate adenyltransferase, putative                           | <i>Ricinus communis</i>                         | dicot    |
| 13     | 225447450 | PREDICTED: hypothetical protein                                           | <i>Vitis vinifera</i>                           | dicot    |
| 14     | 13487709  | ADP-glucose pyrophosphorylase small subunit                               | <i>Brassica rapa</i> subsp. <i>pekinensis</i>   | dicot    |
| 15     | 556622    | ADP-glucose pyrophosphorylase                                             | <i>Beta vulgaris</i> subsp. <i>vulgaris</i>     | dicot    |
| 16     | 1237080   | ADP-glucose pyrophosphorylase                                             | <i>Pisum sativum</i>                            | dicot    |
| 17     | 1237082   | ADP-glucose pyrophosphorylase                                             | <i>Pisum sativum</i>                            | dicot    |
| 18     | 13487787  | ADP-glucose pyrophosphorylase small subunit CagpS1                        | <i>Cicer arietinum</i>                          | dicot    |
| 19     | 16950559  | ADP-glucose pyrophosphorylase small subunit CagpS2                        | <i>Cicer arietinum</i>                          | dicot    |
| 20     | 2642636   | ADP-glucose pyrophosphorylase small subunit                               | <i>Citrullus lanatus</i> subsp. <i>vulgaris</i> | dicot    |
| 21     | 2625084   | ADP-glucose pyrophosphorylase small subunit                               | <i>Cucumis melo</i>                             | dicot    |
| 22     | 5917789   | ADP-glucose pyrophosphorylase small subunit                               | <i>Citrus unshiu</i>                            | dicot    |
| 23     | 111660950 | ADP-glucose pyrophosphorylase small subunit                               | <i>Citrus sinensis</i>                          | dicot    |
| 24     | 41350641  | ADP-glucose pyrophosphorylase small subunit                               | <i>Fragaria x ananassa</i>                      | dicot    |

|    |           |                                                                             |                                              |         |
|----|-----------|-----------------------------------------------------------------------------|----------------------------------------------|---------|
| 25 | 45505207  | ADP-glucose pyrophosphorylase small subunit                                 | <i>Ipomoea batatas</i>                       | dicot   |
| 26 | 45505205  | ADP-glucose pyrophosphorylase small subunit                                 | <i>Ipomoea batatas</i>                       | dicot   |
| 27 | 7671232   | ADP-glucose pyrophosphorylase                                               | <i>Perilla frutescens</i>                    | dicot   |
| 28 | 7671230   | ADP-glucose pyrophosphorylase catalytic subunit                             | <i>Perilla frutescens</i>                    | dicot   |
| 29 | 29421116  | ADP-glucose pyrophosphorylase small subunit PvAGPS1                         | <i>Phaseolus vulgaris</i>                    | dicot   |
| 30 | 440595    | ADP-glucose pyrophosphorylase                                               | <i>Vicia faba</i> var. minor                 | dicot   |
| 31 | 440593    | ADP-glucose pyrophosphorylase                                               | <i>Vicia faba</i> var. minor                 | dicot   |
| 32 | 162462257 | ADP-glucose pyrophosphorylase small subunit                                 | <i>Zea mays</i>                              | monocot |
| 33 | 162461970 | LOC541902                                                                   | <i>Zea mays</i>                              | monocot |
| 34 | 73747074  | ADP-glucose pyrophosphorylase small subunit                                 | <i>Zea mays</i>                              | monocot |
| 35 | 23664353  | Brittle 2                                                                   | <i>Zea mays</i> subsp. <i>mays</i>           | monocot |
| 36 | 14582768  | ADP-glucose pyrophosphorylase small subunit                                 | <i>Zea mays</i>                              | monocot |
| 37 | 115476014 | Os08g0345800                                                                | <i>Oryza sativa</i> Japonica Group           | monocot |
| 38 | 115478426 | Os09g0298200                                                                | <i>Oryza sativa</i> Japonica Group           | monocot |
| 39 | 125987830 | GLGS_ORYSJ                                                                  | <i>Oryza sativa</i> Japonica Group           | monocot |
| 40 | 357157910 | PREDICTED: glucose-1-phosphate adenylyltransferase small subunit            | <i>Brachypodium distachyon</i>               | monocot |
| 41 | 357145854 | PREDICTED: glucose-1-phosphate adenylyltransferase small subunit, isoform 2 | <i>Brachypodium distachyon</i>               | monocot |
| 42 | 357145851 | PREDICTED: glucose-1-phosphate adenylyltransferase small subunit, isoform 1 | <i>Brachypodium distachyon</i>               | monocot |
| 43 | 242048788 | hypothetical protein SORBIDRAFT_02g020410                                   | <i>Sorghum bicolor</i>                       | monocot |
| 44 | 27464770  | ADP-glucose pyrophosphorylase small subunit                                 | <i>Hordeum vulgare</i> subsp. <i>vulgare</i> | monocot |
| 45 | 51556842  | ADP-glucose pyrophosphorylase small subunit a                               | <i>Hordeum vulgare</i>                       | monocot |
| 46 | 1707940   | GLGS_HORVU                                                                  | <i>Hordeum vulgare</i>                       | monocot |
| 47 | 52430025  | ADP-glucose pyrophosphorylase small subunit                                 | <i>Triticum aestivum</i>                     | monocot |
| 48 | 21687     | ADP-glucose pyrophosphorylase                                               | <i>Triticum aestivum</i>                     | monocot |
| 49 | 232166    | GLGL1_SOLTU                                                                 | <i>Solanum tuberosum</i>                     | dicot   |
| 50 | 1707929   | GLGL2_SOLTU                                                                 | <i>Solanum tuberosum</i>                     | dicot   |
| 51 | 1707932   | GLGL3_SOLTU                                                                 | <i>Solanum tuberosum</i>                     | dicot   |

|    |           |                                                                         |                                                |       |
|----|-----------|-------------------------------------------------------------------------|------------------------------------------------|-------|
| 52 | 14916987  | GLGL1_ARATH                                                             | <i>Arabidopsis thaliana</i>                    | dicot |
| 53 | 12644324  | GLGL2_ARATH                                                             | <i>Arabidopsis thaliana</i>                    | dicot |
| 54 | 17433716  | GLGL3_ARATH                                                             | <i>Arabidopsis thaliana</i>                    | dicot |
| 55 | 11386853  | GLGL4_ARATH                                                             | <i>Arabidopsis thaliana</i>                    | dicot |
| 56 | 1947084   | ADP-glucose pyrophosphorylase large subunit agpl1                       | <i>Solanum lycopersicum</i>                    | dicot |
| 57 | 1840114   | ADP-glucose pyrophosphorylase large subunit agpl2                       | <i>Solanum lycopersicum</i>                    | dicot |
| 58 | 1840116   | ADP-glucose pyrophosphorylase large subunit agpl3                       | <i>Solanum lycopersicum</i>                    | dicot |
| 59 | 1778434   | ADP-glucose pyrophosphorylase large subunit agp-s1                      | <i>Solanum lycopersicum</i>                    | dicot |
| 60 | 1778436   | ADP-glucose pyrophosphorylase large subunit agp-s2                      | <i>Solanum lycopersicum</i>                    | dicot |
| 61 | 297812109 | hypothetical protein ARALYDRAFT_488807 agpl1                            | <i>Arabidopsis lyrata</i> subsp. <i>lyrata</i> | dicot |
| 62 | 297845724 | hypothetical protein ARALYDRAFT_472972 agpl2                            | <i>Arabidopsis lyrata</i> subsp. <i>lyrata</i> | dicot |
| 63 | 297797902 | hypothetical protein ARALYDRAFT_490693 agpl3                            | <i>Arabidopsis lyrata</i> subsp. <i>lyrata</i> | dicot |
| 64 | 297821353 | predicted protein agpl4                                                 | <i>Arabidopsis lyrata</i> subsp. <i>lyrata</i> | dicot |
| 65 | 357467317 | Glucose-1-phosphate adenylyltransferase large subunit                   | <i>Medicago truncatula</i>                     | dicot |
| 66 | 356571037 | PREDICTED: glucose-1-phosphate adenylyltransferase large subunit 2      | <i>Glycine max</i>                             | dicot |
| 67 | 356563435 | PREDICTED: glucose-1-phosphate adenylyltransferase large subunit 1      | <i>Glycine max</i>                             | dicot |
| 68 | 356562361 | PREDICTED: glucose-1-phosphate adenylyltransferase large subunit        | <i>Glycine max</i>                             | dicot |
| 69 | 356553863 | PREDICTED: glucose-1-phosphate adenylyltransferase large subunit        | <i>Glycine max</i>                             | dicot |
| 70 | 356545193 | PREDICTED: glucose-1-phosphate adenylyltransferase large subunit 1-like | <i>Glycine max</i>                             | dicot |
| 71 | 356538761 | PREDICTED: glucose-1-phosphate adenylyltransferase large subunit 1-like | <i>Glycine max</i>                             | dicot |
| 72 | 356521967 | PREDICTED: glucose-1-phosphate adenylyltransferase large subunit 1      | <i>Glycine max</i>                             | dicot |
| 73 | 356518710 | PREDICTED: glucose-1-phosphate adenylyltransferase large subunit        | <i>Glycine max</i>                             | dicot |
| 74 | 356517038 | PREDICTED: glucose-1-phosphate adenylyltransferase large subunit 1-like | <i>Glycine max</i>                             | dicot |
| 75 | 356509672 | PREDICTED: glucose-1-phosphate adenylyltransferase large subunit        | <i>Glycine max</i>                             | dicot |
| 76 | 356508352 | PREDICTED: glucose-1-phosphate adenylyltransferase large subunit 1-like | <i>Glycine max</i>                             | dicot |
| 77 | 356503982 | PREDICTED: glucose-1-phosphate adenylyltransferase large subunit 2      | <i>Glycine max</i>                             | dicot |
| 78 | 357511621 | Glucose-1-phosphate adenylyltransferase                                 | <i>Medicago truncatula</i>                     | dicot |

|     |           |                                                                            |                                |         |
|-----|-----------|----------------------------------------------------------------------------|--------------------------------|---------|
| 79  | 357480219 | Glucose-1-phosphate adenylyltransferase                                    | <i>Medicago truncatula</i>     | dicot   |
| 80  | 357473317 | Glucose-1-phosphate adenylyltransferase                                    | <i>Medicago truncatula</i>     | dicot   |
| 81  | 224128113 | predicted protein                                                          | <i>Populus trichocarpa</i>     | dicot   |
| 82  | 224103389 | predicted protein                                                          | <i>Populus trichocarpa</i>     | dicot   |
| 83  | 224117842 | predicted protein                                                          | <i>Populus trichocarpa</i>     | dicot   |
| 84  | 224100249 | predicted protein                                                          | <i>Populus trichocarpa</i>     | dicot   |
| 85  | 224095317 | predicted protein                                                          | <i>Populus trichocarpa</i>     | dicot   |
| 86  | 255585297 | glucose-1-phosphate adenylyltransferase, putative                          | <i>Ricinus communis</i>        | dicot   |
| 87  | 255552303 | glucose-1-phosphate adenylyltransferase, putative                          | <i>Ricinus communis</i>        | dicot   |
| 88  | 255548169 | glucose-1-phosphate adenylyltransferase, putative                          | <i>Ricinus communis</i>        | dicot   |
| 89  | 255543725 | glucose-1-phosphate adenylyltransferase, putative                          | <i>Ricinus communis</i>        | dicot   |
| 90  | 255538708 | glucose-1-phosphate adenylyltransferase, putative                          | <i>Ricinus communis</i>        | dicot   |
| 91  | 225458219 | PREDICTED: hypothetical protein                                            | <i>Vitis vinifera</i>          | dicot   |
| 92  | 225437808 | PREDICTED: hypothetical protein                                            | <i>Vitis vinifera</i>          | dicot   |
| 93  | 225434249 | PREDICTED: hypothetical protein                                            | <i>Vitis vinifera</i>          | dicot   |
| 94  | 225432564 | PREDICTED: hypothetical protein                                            | <i>Vitis vinifera</i>          | dicot   |
| 95  | 225428422 | PREDICTED: hypothetical protein                                            | <i>Vitis vinifera</i>          | dicot   |
| 96  | 224085694 | predicted protein                                                          | <i>Populus trichocarpa</i>     | dicot   |
| 97  | 224080375 | predicted protein                                                          | <i>Populus trichocarpa</i>     | dicot   |
| 98  | 224062107 | predicted protein                                                          | <i>Populus trichocarpa</i>     | dicot   |
| 99  | 162460455 | plastid ADP-glucose pyrophosphorylase large subunit                        | <i>Zea mays</i>                | monocot |
| 100 | 189027076 | glucose-1-phosphate adenylyltransferase large subunit 1                    | <i>Zea mays</i>                | monocot |
| 101 | 162458350 | glucose-1-phosphate adenylyltransferase large subunit 2                    | <i>Zea mays</i>                | monocot |
| 102 | 162463875 | putative glucose-1-phosphate adenylyltransferase large subunit 3 precursor | <i>Zea mays</i>                | monocot |
| 103 | 357132398 | PREDICTED: glucose-1-phosphate adenylyltransferase large subunit           | <i>Brachypodium distachyon</i> | monocot |
| 104 | 357119087 | PREDICTED: glucose-1-phosphate adenylyltransferase large subunit 2         | <i>Brachypodium distachyon</i> | monocot |
| 105 | 357116651 | PREDICTED: glucose-1-phosphate adenylyltransferase large subunit 1         | <i>Brachypodium distachyon</i> | monocot |

|     |           |                                                     |                                          |               |
|-----|-----------|-----------------------------------------------------|------------------------------------------|---------------|
| 106 | 115455167 | Os03g0735000                                        | <i>Oryza sativa</i> Japonica Group       | monocot       |
| 107 | 297604962 | Os05g0580000                                        | <i>Oryza sativa</i> Japonica Group       | monocot       |
| 108 | 115471355 | Os07g0243200                                        | <i>Oryza sativa</i> Japonica Group       | monocot       |
| 109 | 115438749 | Os01g0633100                                        | <i>Oryza sativa</i> Japonica Group       | monocot       |
| 110 | 242088961 | hypothetical protein SORBIDRAFT_09g029610           | <i>Sorghum bicolor</i>                   | monocot       |
| 111 | 242053733 | hypothetical protein SORBIDRAFT_03g028850           | <i>Sorghum bicolor</i>                   | monocot       |
| 112 | 242033053 | hypothetical protein SORBIDRAFT_01g008940           | <i>Sorghum bicolor</i>                   | monocot       |
| 113 | 1279513   | glucose-1-phosphate adenyltransferase               | <i>Hordeum vulgare</i> subsp. vulgare    | monocot       |
| 114 | 2105137   | ADP-glucose pyrophosphorylase large subunit         | <i>Hordeum vulgare</i> subsp. vulgare    | monocot       |
| 115 | 445623    | ADP glucose pyrophosphorylase : SUBUNIT=L           | <i>Hordeum vulgare</i>                   | monocot       |
| 116 | 22347636  | ADP-glucose pyrophosphorylase large subunit         | <i>Oncidium Goldiana</i>                 | monocot       |
| 117 | 32812836  | ADP-glucose pyrophosphorylase large subunit         | <i>Triticum aestivum</i>                 | monocot       |
| 118 | 89277026  | plastid ADP-glucose pyrophosphorylase large subunit | <i>Triticum aestivum</i>                 | monocot       |
| 119 | 1707930   | GLGL2_WHEAT                                         | <i>Triticum aestivum</i>                 | monocot       |
| 120 | 121293    | GLGL3_WHEAT                                         | <i>Triticum aestivum</i>                 | monocot       |
| 121 | 87124328  | ADP-glucose pyrophosphorylase                       | <i>Synechococcus</i> sp. RS9917          | cyanobacteria |
| 122 | 284051940 | glucose-1-phosphate adenyltransferase               | <i>Arthrospira platensis</i> str. Paraca | cyanobacteria |
| 123 | 119509469 | glucose-1-phosphate adenyltransferase               | <i>Nodularia spumigena</i> CCY9414       | cyanobacteria |
| 124 | 126660345 | glucose-1-phosphate adenyltransferase               | <i>Cyanothece</i> sp. CCY0110            | cyanobacteria |
| 125 | 126658160 | glucose-1-phosphate adenyltransferase               | <i>Cyanothece</i> sp. CCY0110            | cyanobacteria |
| 126 | 318041355 | glucose-1-phosphate adenyltransferase               | <i>Synechococcus</i> sp. CB0101          | cyanobacteria |
| 127 | 317969822 | glucose-1-phosphate adenyltransferase               | <i>Synechococcus</i> sp. CB0205          | cyanobacteria |
| 128 | 87302823  | glucose-1-phosphate adenyltransferase               | <i>Synechococcus</i> sp. WH 5701         | cyanobacteria |
| 129 | 119490200 | glucose-1-phosphate adenyltransferase               | <i>Lyngbya</i> sp. PCC 8106              | cyanobacteria |
| 130 | 116074714 | glucose-1-phosphate adenyltransferase               | <i>Synechococcus</i> sp. RS9916          | cyanobacteria |
| 131 | 116070673 | glucose-1-phosphate adenyltransferase               | <i>Synechococcus</i> sp. BL107           | cyanobacteria |
| 132 | 88808518  | glucose-1-phosphate adenyltransferase               | <i>Synechococcus</i> sp. WH 7805         | cyanobacteria |

|     |           |                                       |                                              |               |
|-----|-----------|---------------------------------------|----------------------------------------------|---------------|
| 133 | 37523829  | glucose-1-phosphate adenyltransferase | <i>Gloeobacter violaceus</i> PCC 7421        | cyanobacteria |
| 134 | 33861326  | glucose-1-phosphate adenyltransferase | <i>Prochlorococcus marinus</i> str. CCMP1986 | cyanobacteria |
| 135 | 33240292  | glucose-1-phosphate adenyltransferase | <i>Prochlorococcus marinus</i> str. CCMP1375 | cyanobacteria |
| 136 | 22298830  | glucose-1-phosphate adenyltransferase | <i>Thermosynechococcus elongatus</i> BP-1    | cyanobacteria |
| 137 | 218248785 | glucose-1-phosphate adenyltransferase | <i>Cyanothece</i> sp. PCC 8801               | cyanobacteria |
| 138 | 186686123 | glucose-1-phosphate adenyltransferase | <i>Nostoc punctiforme</i> PCC 73102          | cyanobacteria |
| 139 | 124023387 | glucose-1-phosphate adenyltransferase | <i>Prochlorococcus marinus</i> str. MIT 9303 | cyanobacteria |
| 140 | 86608545  | glucose-1-phosphate adenyltransferase | <i>Synechococcus</i> sp. JA-2-3B'a(2-13)     | cyanobacteria |
| 141 | 86606226  | glucose-1-phosphate adenyltransferase | <i>Synechococcus</i> sp. JA-3-3Ab            | cyanobacteria |
| 142 | 33862839  | glucose-1-phosphate adenyltransferase | <i>Prochlorococcus marinus</i> str. MIT 9313 | cyanobacteria |
| 143 | 33865652  | glucose-1-phosphate adenyltransferase | <i>Synechococcus</i> sp. WH 8102             | cyanobacteria |
| 144 | 17232137  | glucose-1-phosphate adenyltransferase | <i>Nostoc</i> sp. PCC 7120                   | cyanobacteria |
| 145 | 159903534 | glucose-1-phosphate adenyltransferase | <i>Prochlorococcus marinus</i> str. MIT 9211 | cyanobacteria |
| 146 | 126696167 | glucose-1-phosphate adenyltransferase | <i>Prochlorococcus marinus</i> str. MIT 9301 | cyanobacteria |
| 147 | 124025514 | glucose-1-phosphate adenyltransferase | <i>Prochlorococcus marinus</i> str. NATL1A   | cyanobacteria |
| 148 | 123968364 | glucose-1-phosphate adenyltransferase | <i>Prochlorococcus marinus</i> str. AS9601   | cyanobacteria |
| 149 | 123966049 | glucose-1-phosphate adenyltransferase | <i>Prochlorococcus marinus</i> str. MIT 9515 | cyanobacteria |
| 150 | 113954397 | glucose-1-phosphate adenyltransferase | <i>Synechococcus</i> sp. CC9311              | cyanobacteria |
| 151 | 218437477 | glucose-1-phosphate adenyltransferase | <i>Cyanothece</i> sp. PCC 7424               | cyanobacteria |
| 152 | 78779161  | glucose-1-phosphate adenyltransferase | <i>Prochlorococcus marinus</i> str. MIT 9312 | cyanobacteria |
| 153 | 16332282  | glucose-1-phosphate adenyltransferase | <i>Synechocystis</i> sp. PCC 6803            | cyanobacteria |
| 154 | 257061844 | glucose-1-phosphate adenyltransferase | <i>Cyanothece</i> sp. PCC 8802               | cyanobacteria |
| 155 | 56750930  | glucose-1-phosphate adenyltransferase | <i>Synechococcus elongatus</i> PCC 6301      | cyanobacteria |
| 156 | 220910118 | glucose-1-phosphate adenyltransferase | <i>Cyanothece</i> sp. PCC 7425               | cyanobacteria |
| 157 | 81299414  | glucose-1-phosphate adenyltransferase | <i>Synechococcus elongatus</i> PCC 7942      | cyanobacteria |
| 158 | 78212786  | glucose-1-phosphate adenyltransferase | <i>Synechococcus</i> sp. CC9605              | cyanobacteria |
| 159 | 78184800  | glucose-1-phosphate adenyltransferase | <i>Synechococcus</i> sp. CC9902              | cyanobacteria |

|     |           |                                       |                                              |               |
|-----|-----------|---------------------------------------|----------------------------------------------|---------------|
| 160 | 158335435 | glucose-1-phosphate adenyltransferase | <i>Acaryochloris marina</i> MBIC11017        | cyanobacteria |
| 161 | 158335089 | glucose-1-phosphate adenyltransferase | <i>Acaryochloris marina</i> MBIC11017        | cyanobacteria |
| 162 | 113477795 | glucose-1-phosphate adenyltransferase | <i>Trichodesmium erythraeum</i> IMS101       | cyanobacteria |
| 163 | 75908241  | glucose-1-phosphate adenyltransferase | <i>Anabaena variabilis</i> ATCC 29413        | cyanobacteria |
| 164 | 172037571 | glucose-1-phosphate adenyltransferase | <i>Cyanothece</i> sp. ATCC 51142             | cyanobacteria |
| 165 | 172035903 | glucose-1-phosphate adenyltransferase | <i>Cyanothece</i> sp. ATCC 51142             | cyanobacteria |
| 166 | 170076729 | glucose-1-phosphate adenyltransferase | <i>Synechococcus</i> sp. PCC 7002            | cyanobacteria |
| 167 | 157413198 | glucose-1-phosphate adenyltransferase | <i>Prochlorococcus marinus</i> str. MIT 9215 | cyanobacteria |
| 168 | 72382015  | glucose-1-phosphate adenyltransferase | <i>Prochlorococcus marinus</i> str. NATL2A   | cyanobacteria |
| 169 | 148242352 | glucose-1-phosphate adenyltransferase | <i>Synechococcus</i> sp. RCC307              | cyanobacteria |
| 170 | 148239634 | glucose-1-phosphate adenyltransferase | <i>Synechococcus</i> sp. WH 7803             | cyanobacteria |
| 171 | 166365546 | glucose-1-phosphate adenyltransferase | <i>Microcystis aeruginosa</i> NIES-843       | cyanobacteria |
| 172 | 254526910 | glucose-1-phosphate adenyltransferase | <i>Prochlorococcus marinus</i> str. MIT 9202 | cyanobacteria |
| 173 | 254432095 | glucose-1-phosphate adenyltransferase | <i>Cyanobium</i> sp. PCC 7001                | cyanobacteria |
| 174 | 307151922 | glucose-1-phosphate adenyltransferase | <i>Cyanothece</i> sp. PCC 7822               | cyanobacteria |
| 175 | 298492804 | glucose-1-phosphate adenyltransferase | <i>Nostoc azollae</i> 0708                   | cyanobacteria |
| 176 | 332709240 | glucose-1-phosphate adenyltransferase | <i>Lyngbya majuscula</i> 3L                  | cyanobacteria |
| 177 | 354565610 | glucose-1-phosphate adenyltransferase | <i>Fischerella</i> sp. JSC-11                | cyanobacteria |
| 178 | 354556049 | glucose-1-phosphate adenyltransferase | <i>Cyanothece</i> sp. ATCC 51472             | cyanobacteria |
| 179 | 354553549 | glucose-1-phosphate adenyltransferase | <i>Cyanothece</i> sp. ATCC 51472             | cyanobacteria |
| 180 | 352094384 | glucose-1-phosphate adenyltransferase | <i>Synechococcus</i> sp. WH 8016             | cyanobacteria |
| 181 | 284929352 | glucose-1-phosphate adenyltransferase | cyanobacterium UCYN-A                        | cyanobacteria |
| 182 | 334120832 | glucose-1-phosphate adenyltransferase | <i>Microcoleus vaginatus</i> FGP-2           | cyanobacteria |
| 183 | 300865383 | glucose-1-phosphate adenyltransferase | <i>Oscillatoria</i> sp. PCC 6506             | cyanobacteria |
| 184 | 282899378 | glucose-1-phosphate adenyltransferase | <i>Cylindrospermopsis raciborskii</i> CS-505 | cyanobacteria |
| 185 | 282895605 | glucose-1-phosphate adenyltransferase | <i>Raphidiopsis brookii</i> D9               | cyanobacteria |
| 186 | 209527099 | glucose-1-phosphate adenyltransferase | <i>Arthrospira maxima</i> CS-328             | cyanobacteria |

|     |           |                                             |                                         |               |
|-----|-----------|---------------------------------------------|-----------------------------------------|---------------|
| 187 | 67924676  | glucose-1-phosphate adenyltransferase       | <i>Crocospaera watsonii</i> WH 8501     | cyanobacteria |
| 188 | 260436638 | glucose-1-phosphate adenyltransferase       | <i>Synechococcus</i> sp. WH 8109        | cyanobacteria |
| 189 | 303273364 | adp-glucose pyrophosphorylase               | <i>Micromonas pusilla</i> CCMP1545      | green alga    |
| 190 | 303271247 | adp-glucose pyrophosphorylase               | <i>Micromonas pusilla</i> CCMP1545      | green alga    |
| 191 | 255070935 | adp-glucose pyrophosphorylase               | <i>Micromonas</i> sp. RCC299            | green alga    |
| 192 | 255080070 | adp-glucose pyrophosphorylase               | <i>Micromonas</i> sp. RCC299            | green alga    |
| 193 | 159470605 | ADP-glucose pyrophosphorylase large subunit | <i>Chlamydomonas reinhardtii</i>        | green alga    |
| 194 | 159467349 | ADP-glucose pyrophosphorylase small subunit | <i>Chlamydomonas reinhardtii</i>        | green alga    |
| 195 | 308814250 | AGPLU2 (ISS)                                | <i>Ostreococcus tauri</i>               | green alga    |
| 196 | 308806175 | AGPSU1 (ISS)                                | <i>Ostreococcus tauri</i>               | green alga    |
| 197 | 302849075 | hypothetical protein VOLCADRAFT_76956       | <i>Volvox carteri</i> f. nagariensis    | green alga    |
| 198 | 302840808 | hypothetical protein VOLCADRAFT_75183       | <i>Volvox carteri</i> f. nagariensis    | green alga    |
| 199 | 145356323 | predicted protein                           | <i>Ostreococcus lucimarinus</i> CCE9901 | green alga    |
| 200 | 145349062 | predicted protein                           | <i>Ostreococcus lucimarinus</i> CCE9901 | green alga    |
| 201 | 302825850 | hypothetical protein SELMODRAFT_138695      | <i>Selaginella moellendorffii</i>       | moss          |
| 202 | 302815217 | hypothetical protein SELMODRAFT_129625      | <i>Selaginella moellendorffii</i>       | moss          |
| 203 | 302802313 | hypothetical protein SELMODRAFT_117069      | <i>Selaginella moellendorffii</i>       | moss          |
| 204 | 302800351 | hypothetical protein SELMODRAFT_115472      | <i>Selaginella moellendorffii</i>       | moss          |
| 205 | 302798196 | hypothetical protein SELMODRAFT_233627      | <i>Selaginella moellendorffii</i>       | moss          |
| 206 | 302788037 | hypothetical protein SELMODRAFT_267891      | <i>Selaginella moellendorffii</i>       | moss          |
| 207 | 302783933 | hypothetical protein SELMODRAFT_149205      | <i>Selaginella moellendorffii</i>       | moss          |
| 208 | 302773934 | hypothetical protein SELMODRAFT_231637      | <i>Selaginella moellendorffii</i>       | moss          |
| 209 | 302769466 | hypothetical protein SELMODRAFT_169778      | <i>Selaginella moellendorffii</i>       | moss          |
